# Supplementary material for: Time trends in ethnic inequalities in child health and nutrition: analysis of 59 low and middle-income countries
Source: Springer Nature journal article supplement (doi:10.1186/s12939-023-01888-5), 2023-04-28

Supplementary figures 2. Composite coverage index by ethnic groups in the first and last surveys. Results for selected countries. The numbers in the black rectangles show the average proportion of the samples for each ethnic groups in the two surveys. The numbers at the bottom of the bars show the ratio between the rate in a particular ethnic group and the national rate for that point in time (\* statistically significant in relation to the respective national average).

Albania

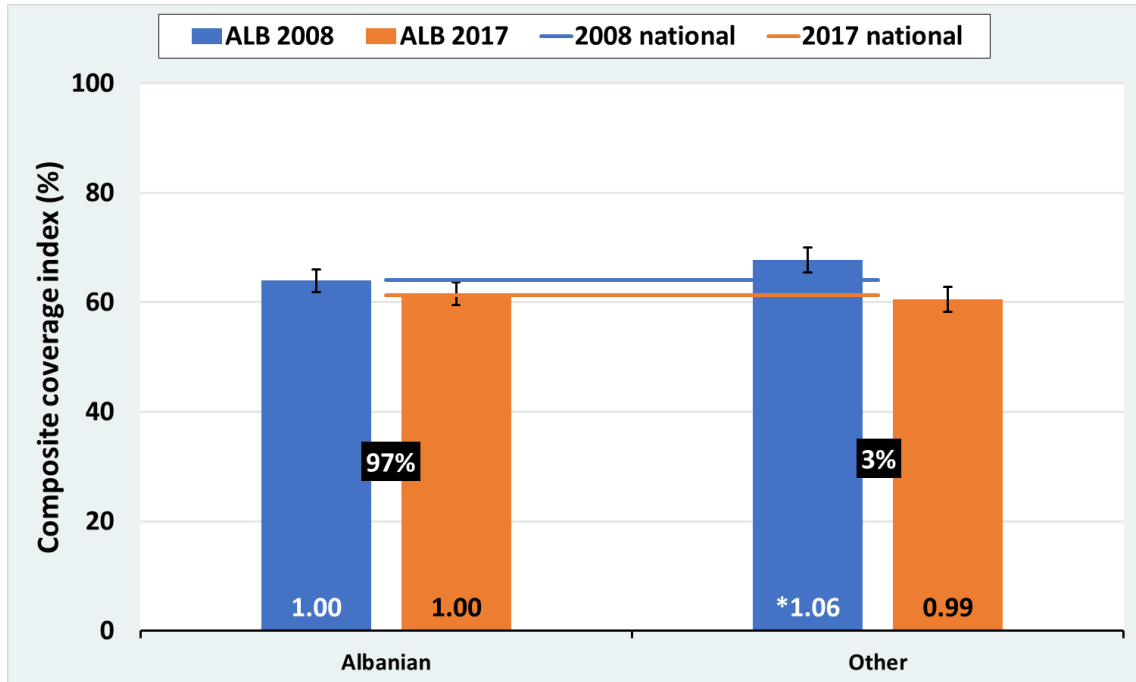

Belize

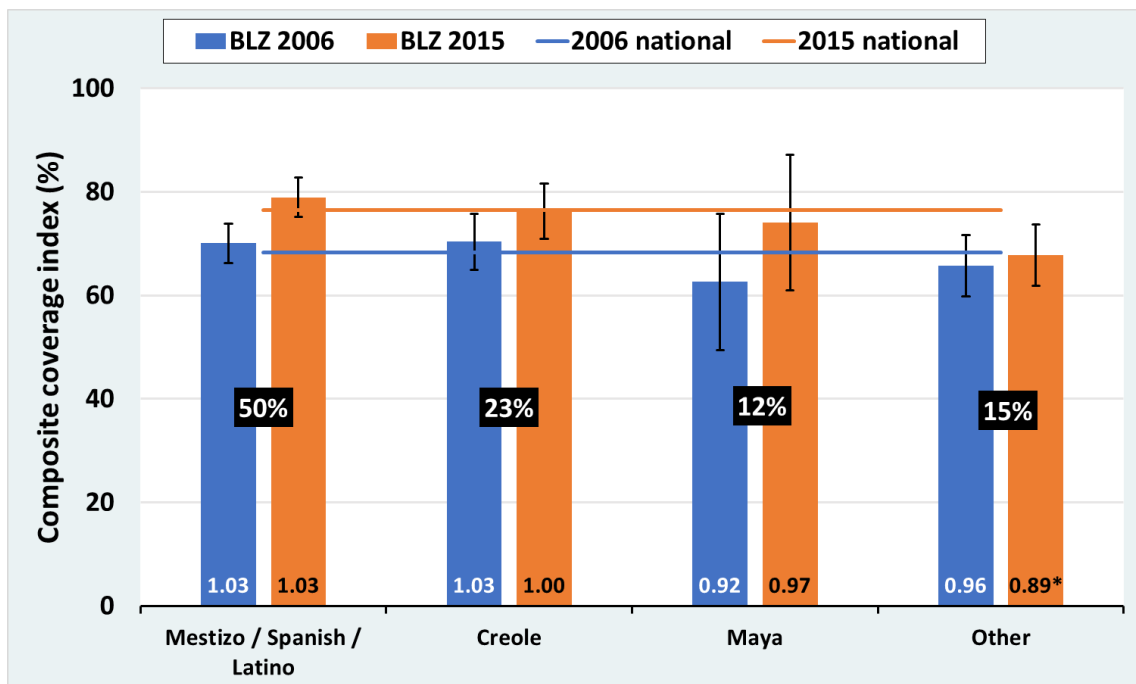

## Benin

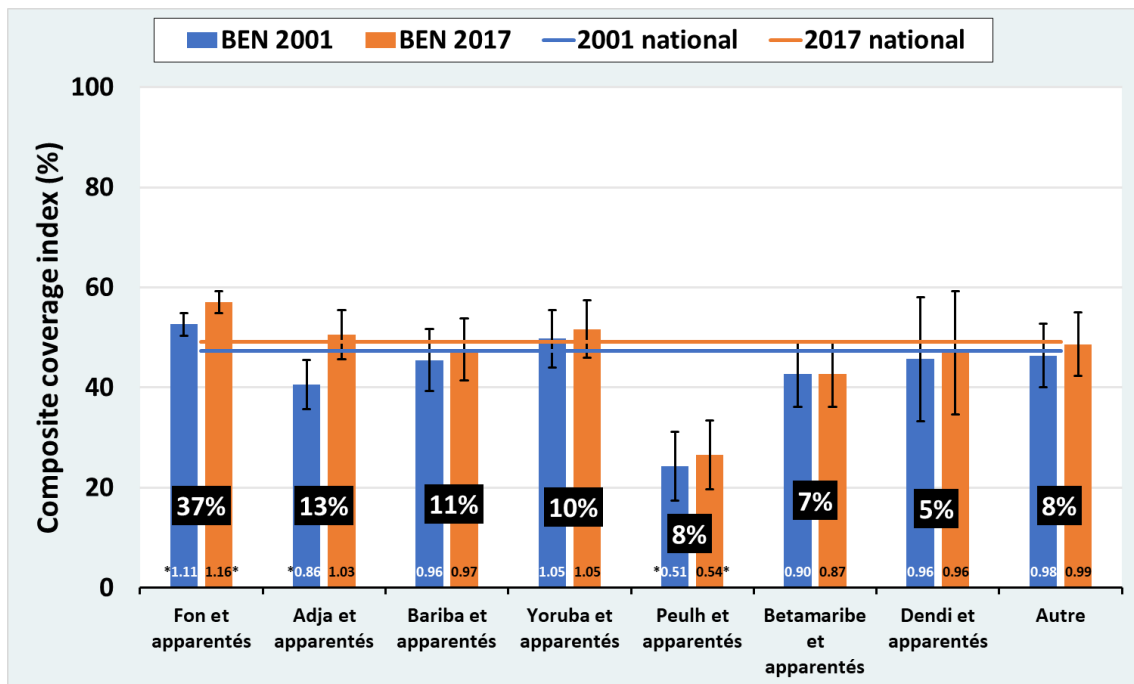

## Burkina Faso

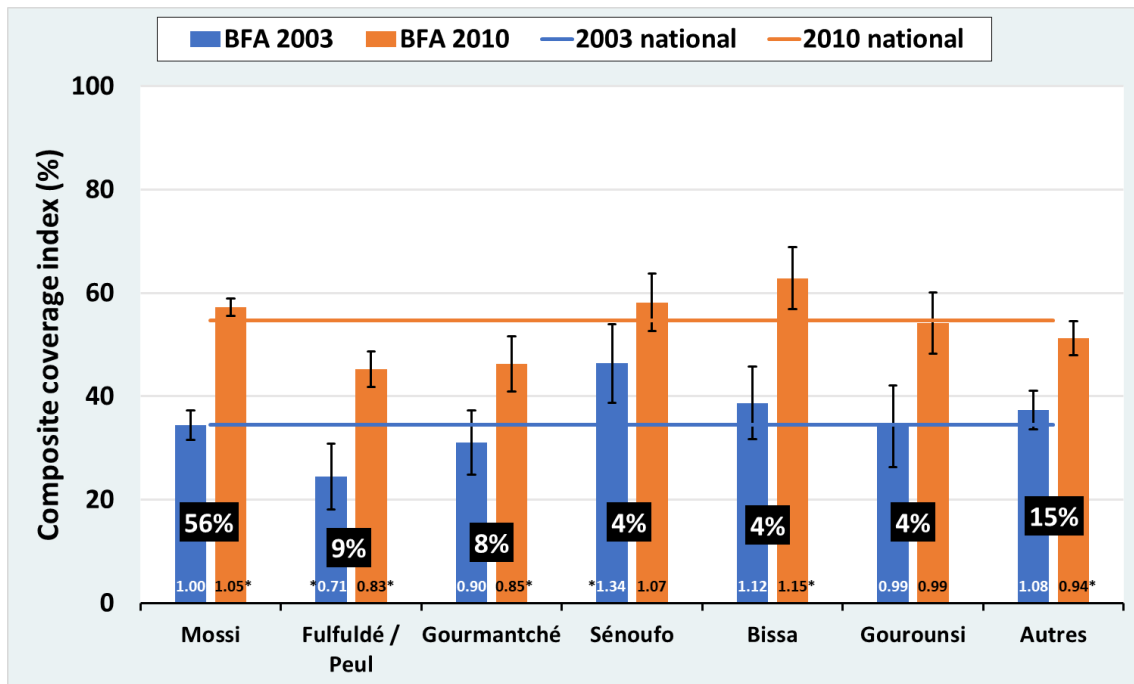

## Cameroon

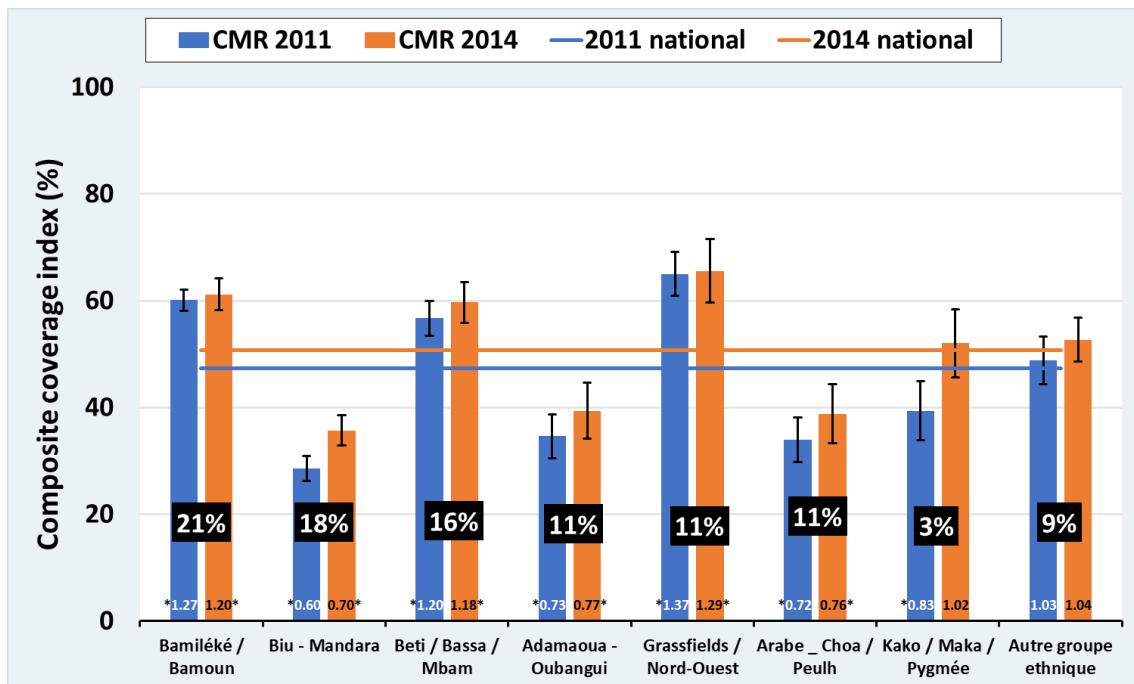

## Central African Republic

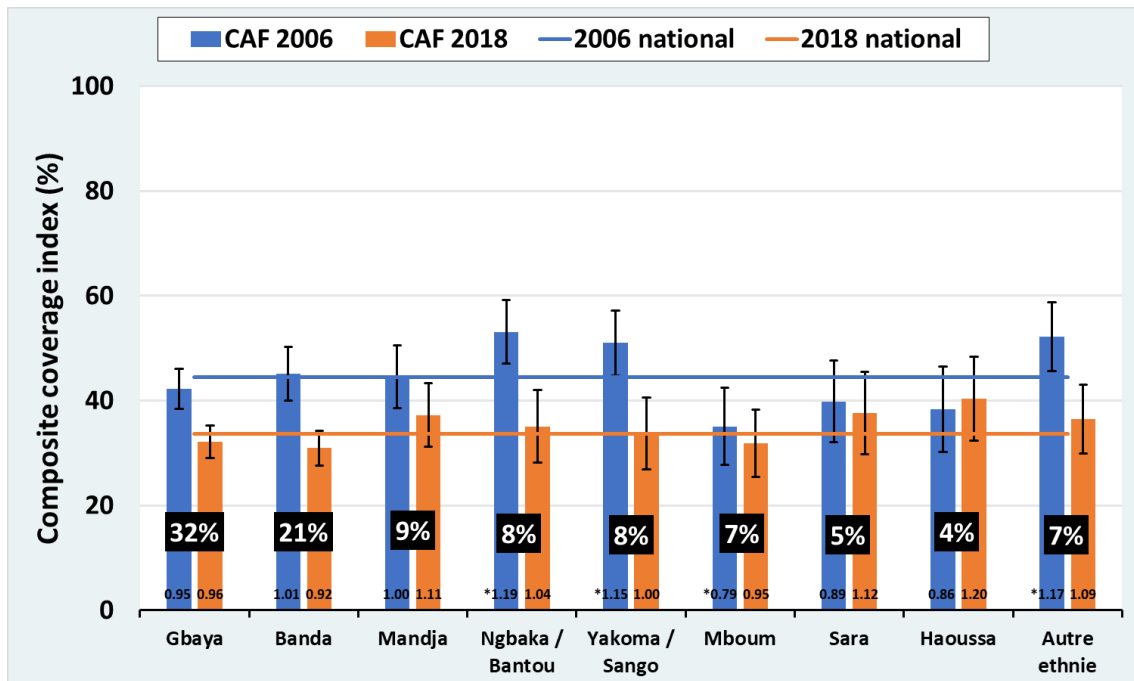

Chad

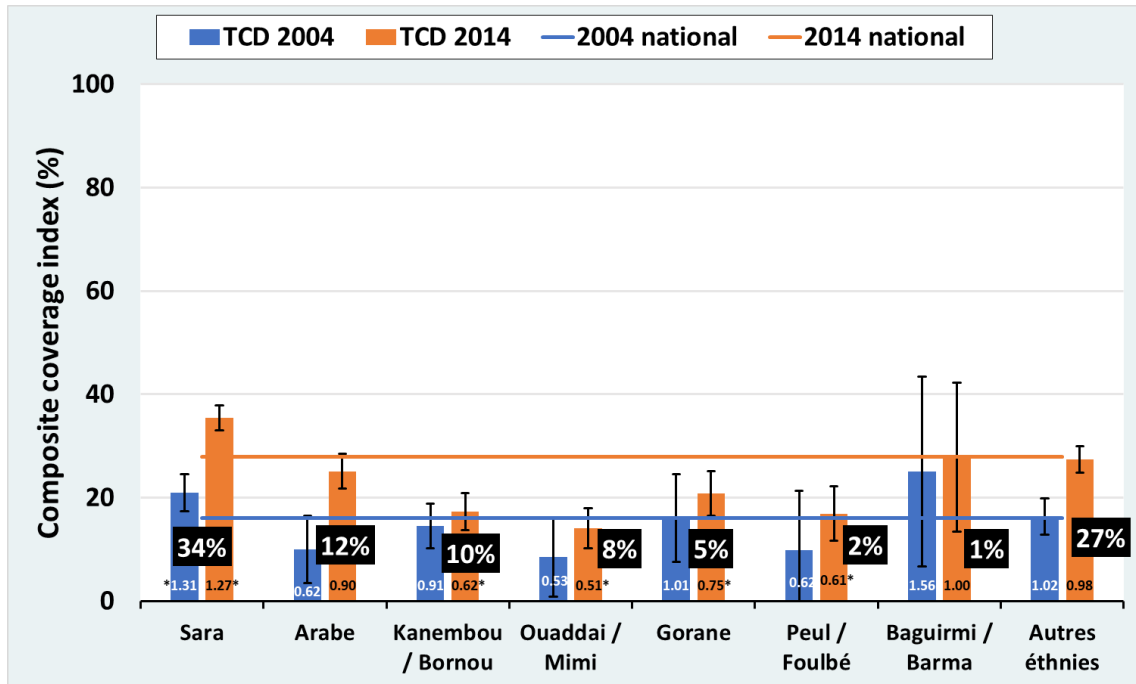

Congo DR

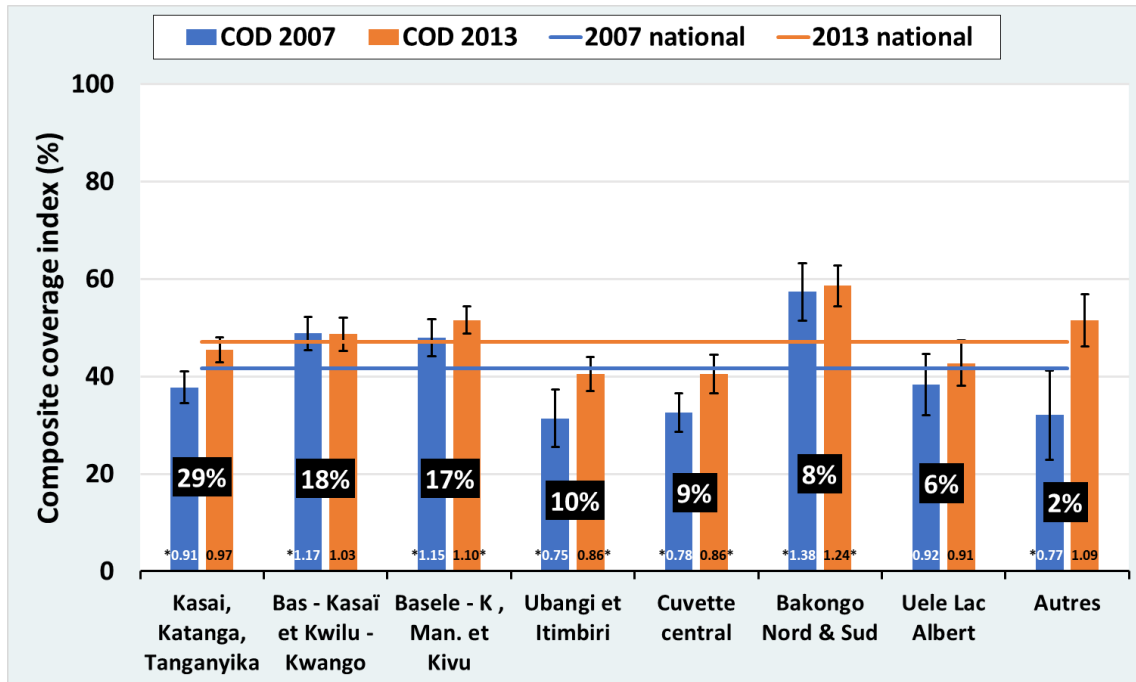

### Congo Republic

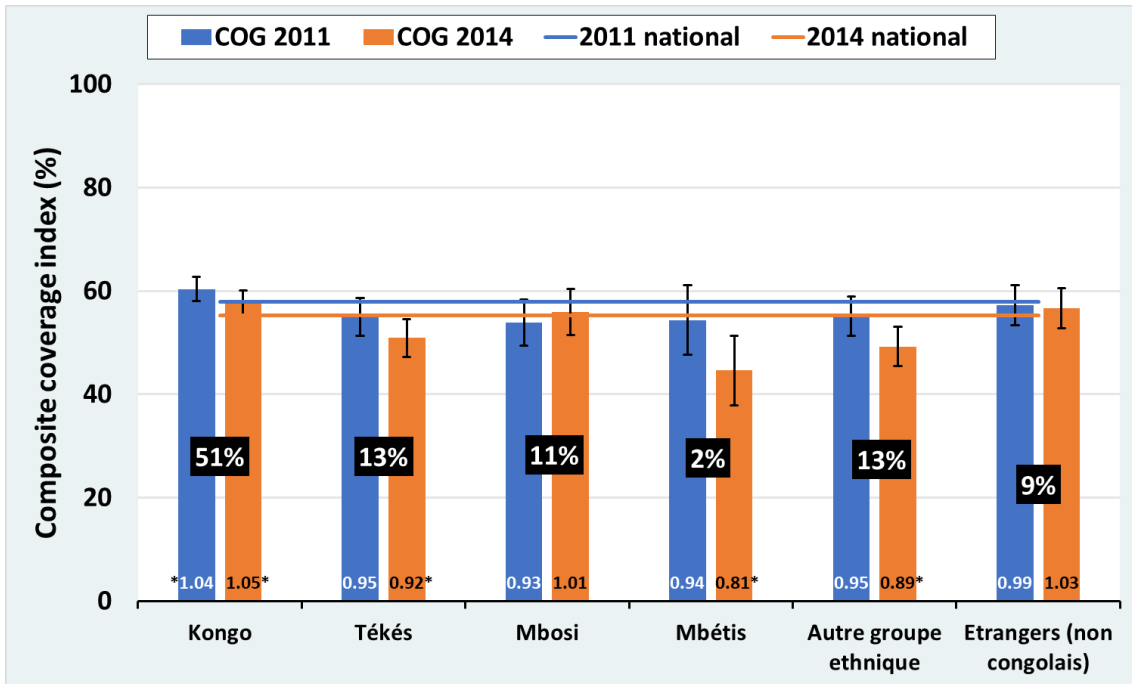

### Costa Rica

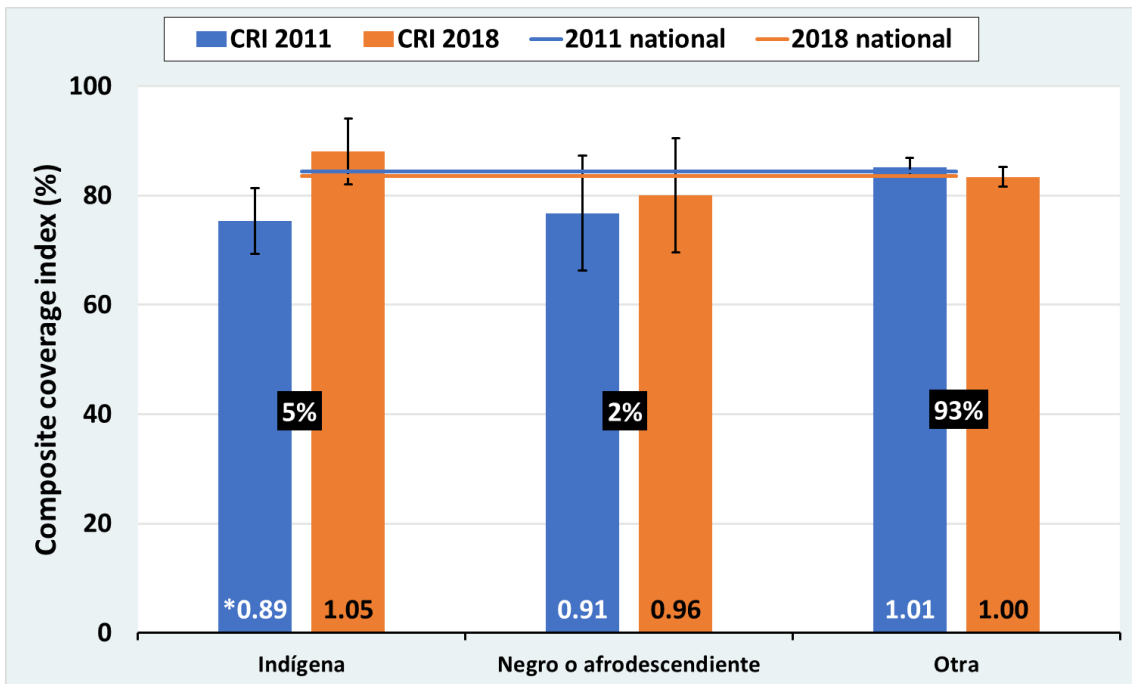

Côte d'Ivoire

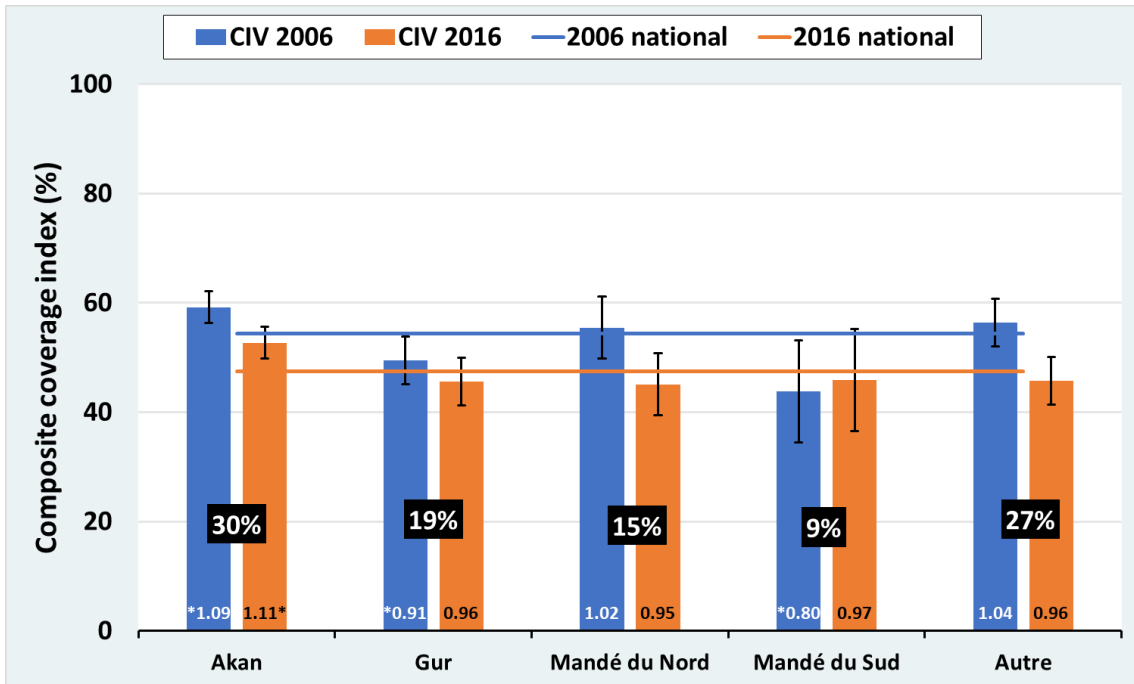

Dominican Republic

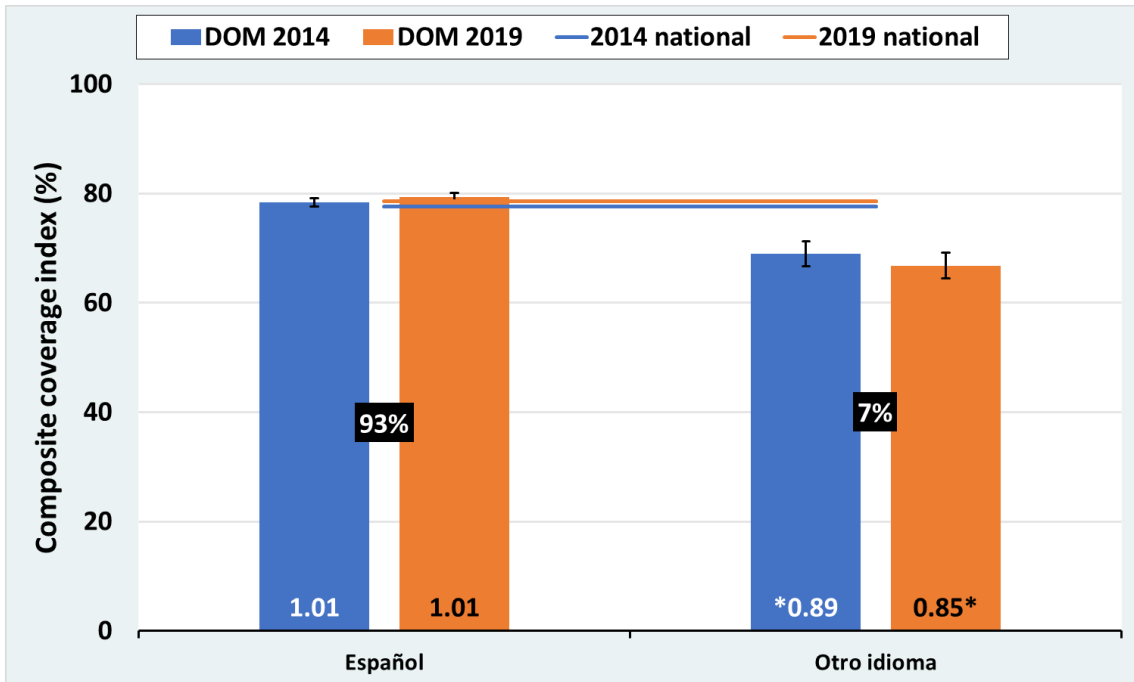

## Ethiopia

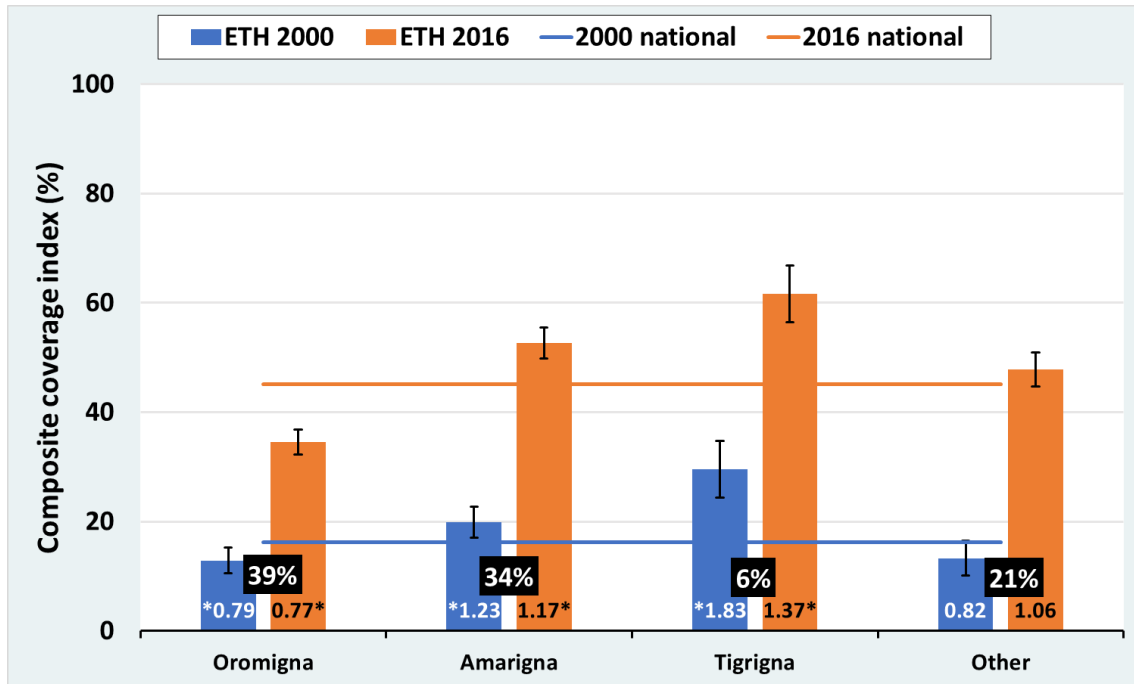

## Gabon

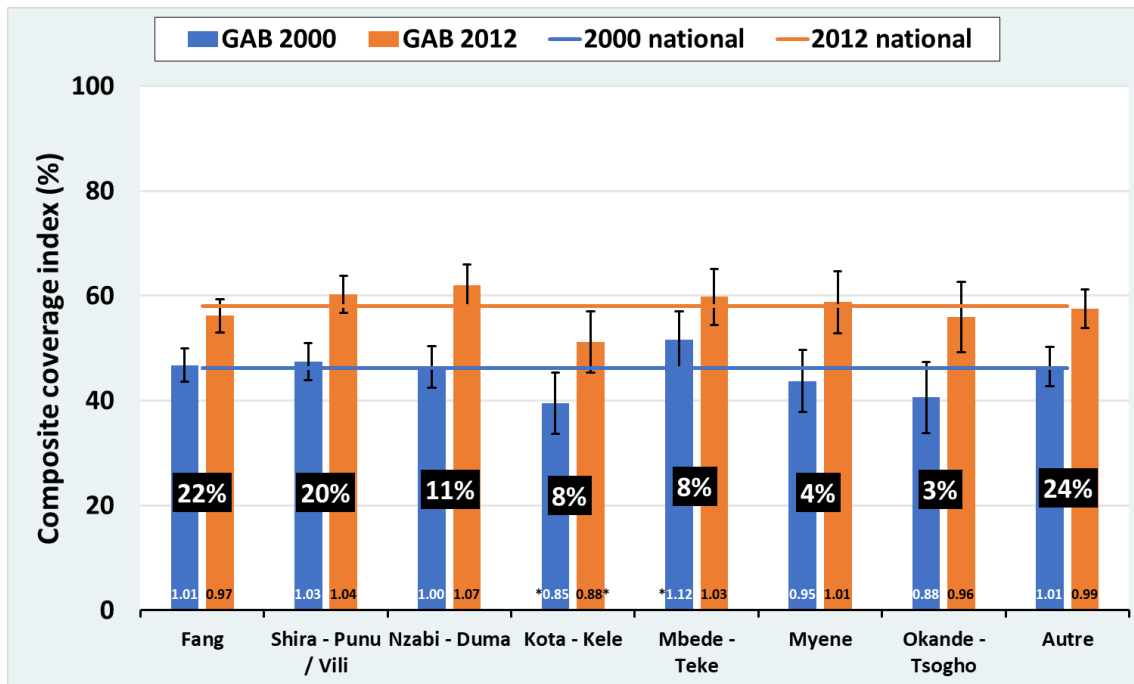

## Gambia

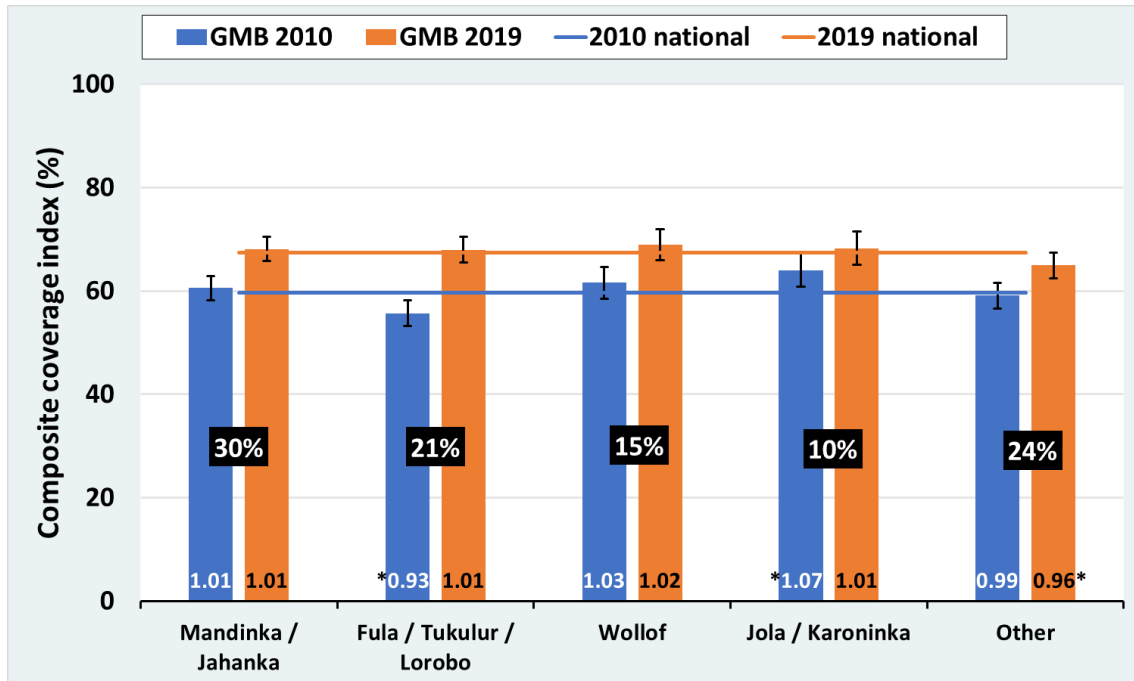

## Ghana

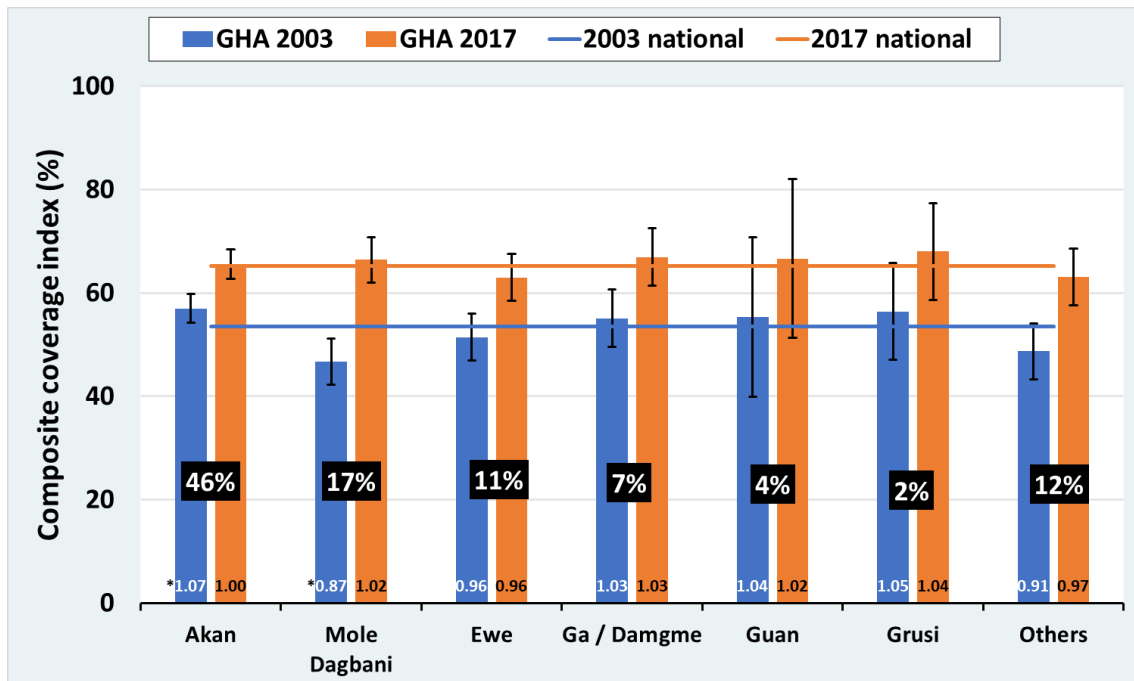



## Guinea

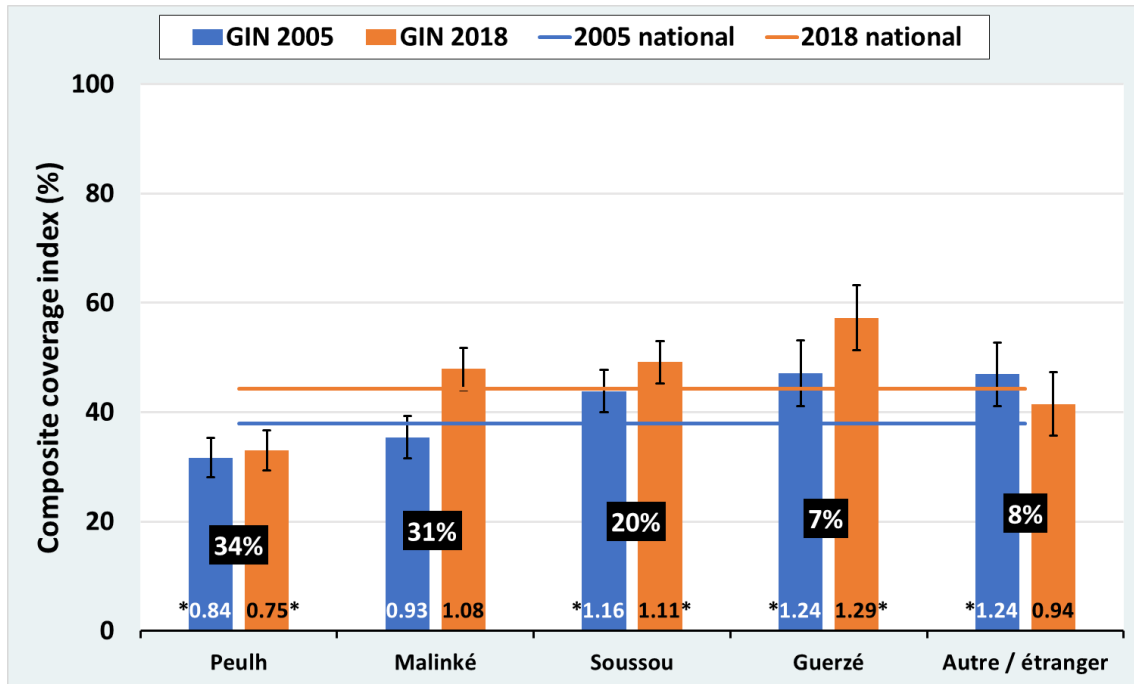

## Guinea-Bissau

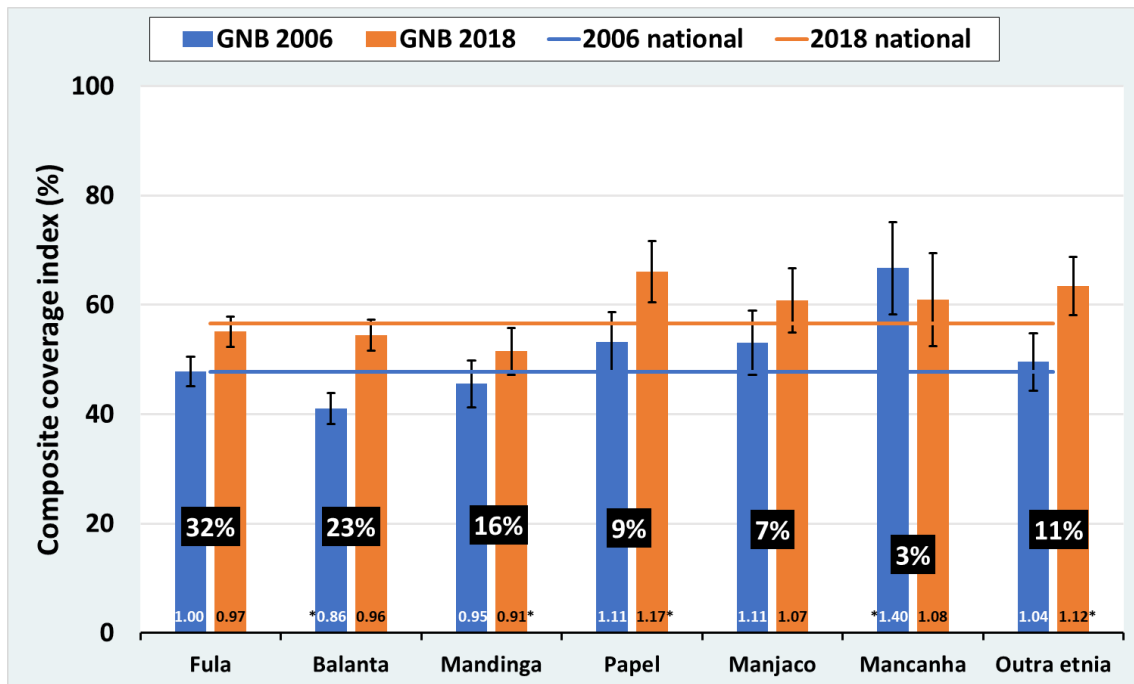

### Guyana

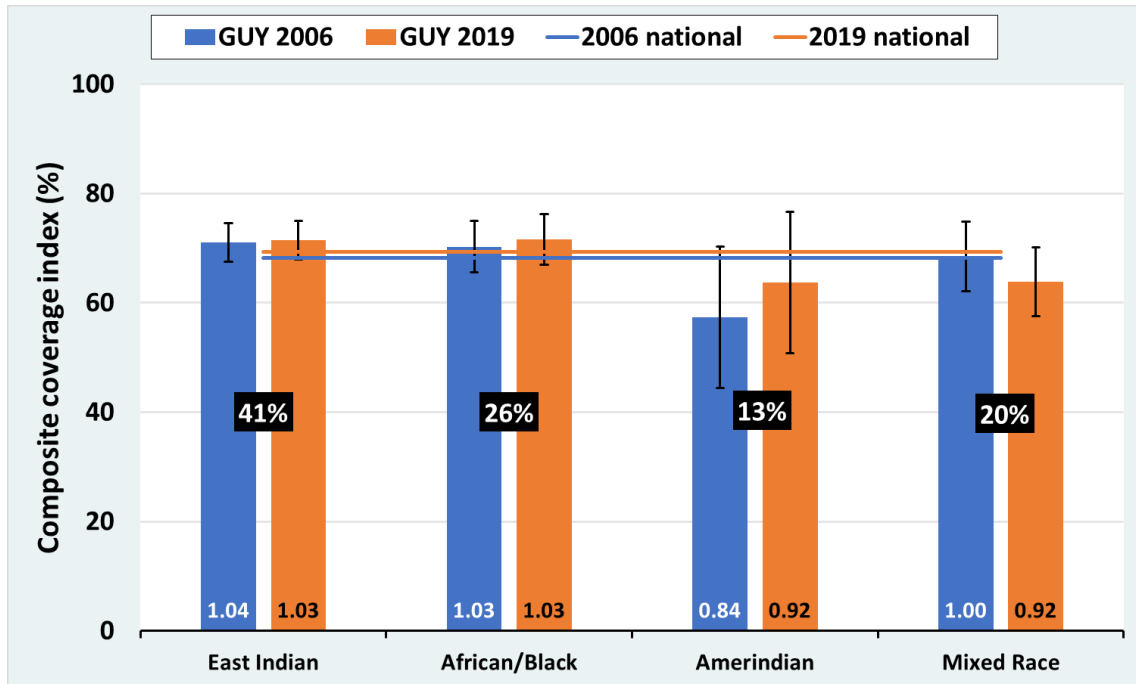

### Honduras

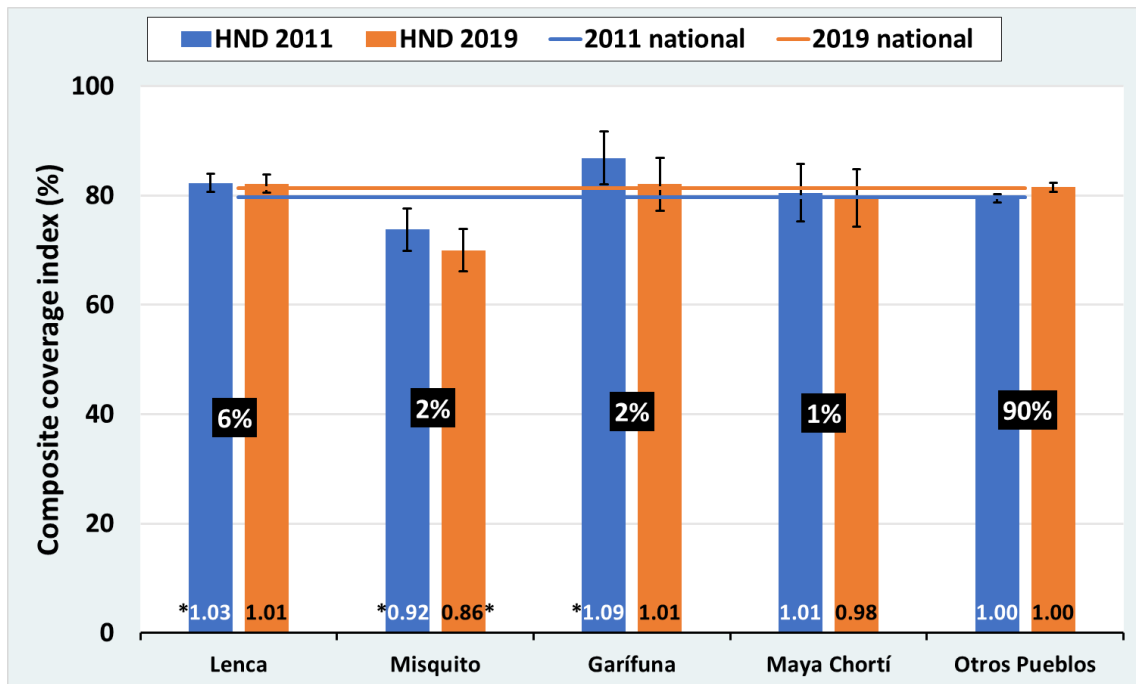

## India

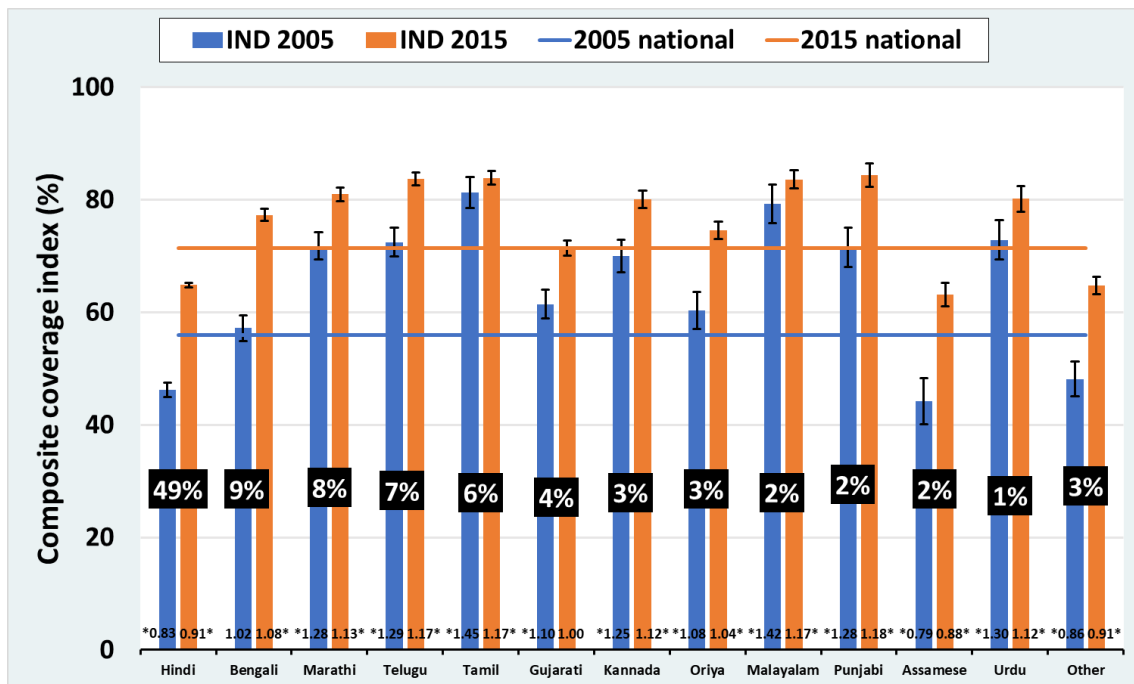

## Kenya

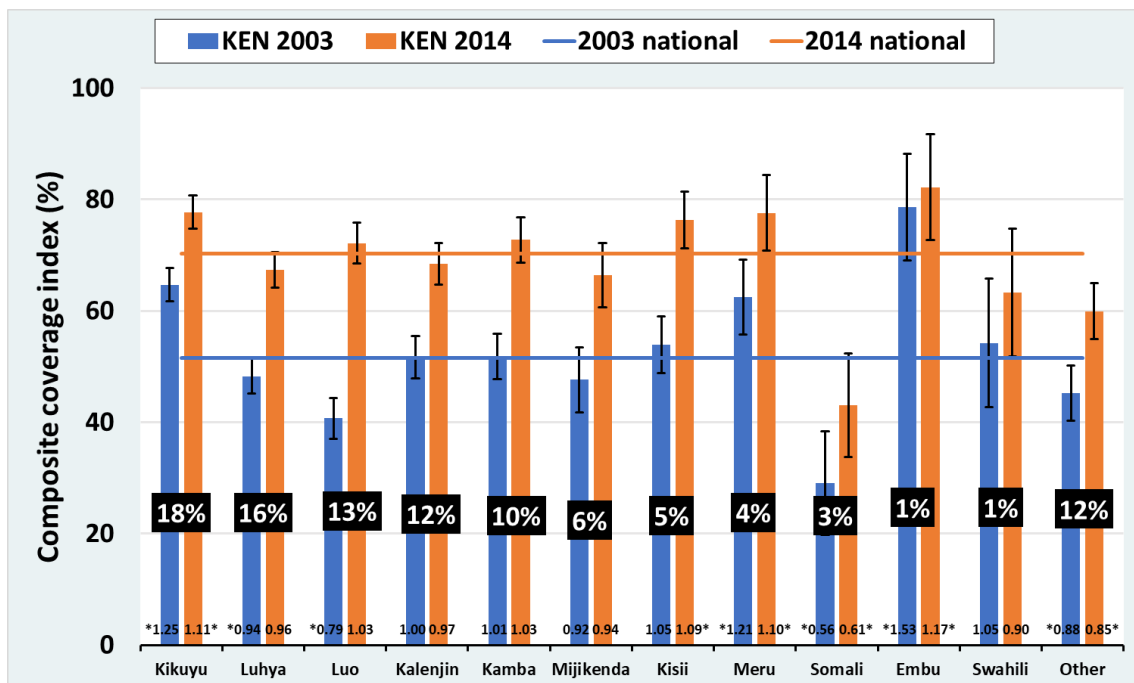

### Kyrgyzstan

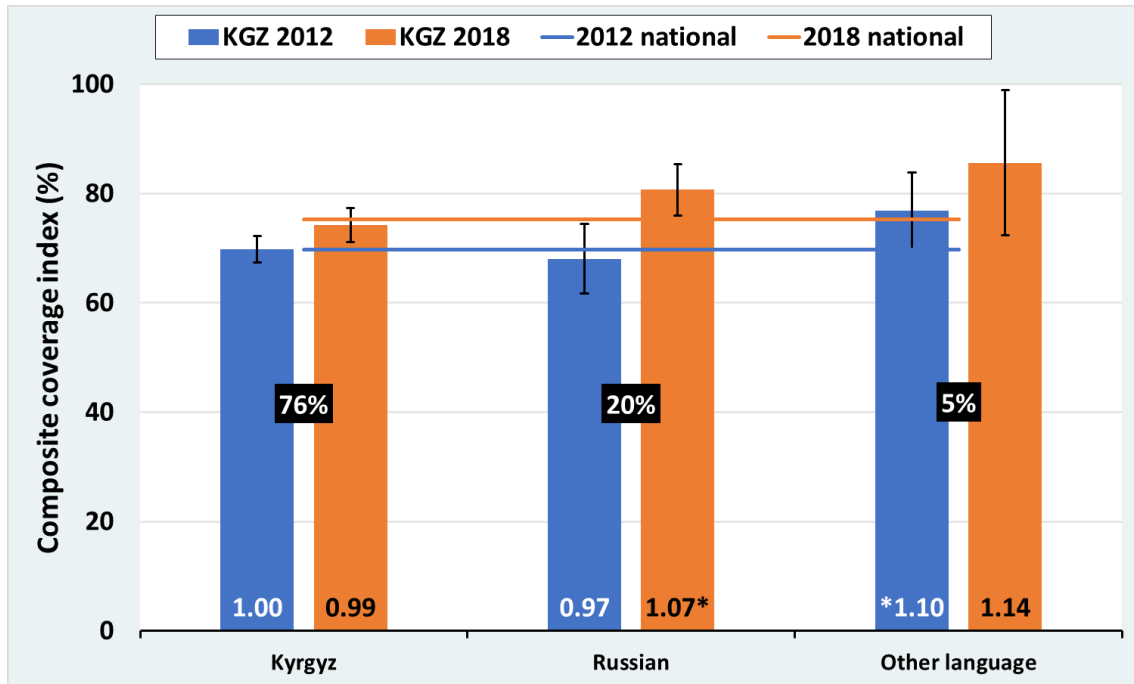

### Lao PDR

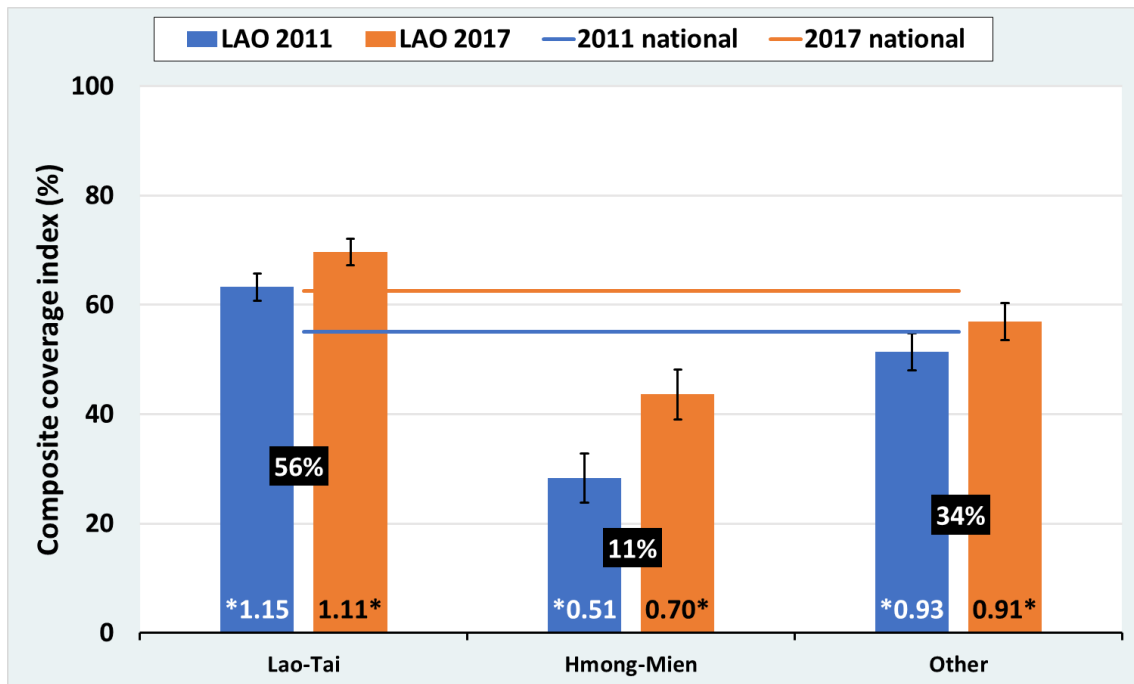

Malawi

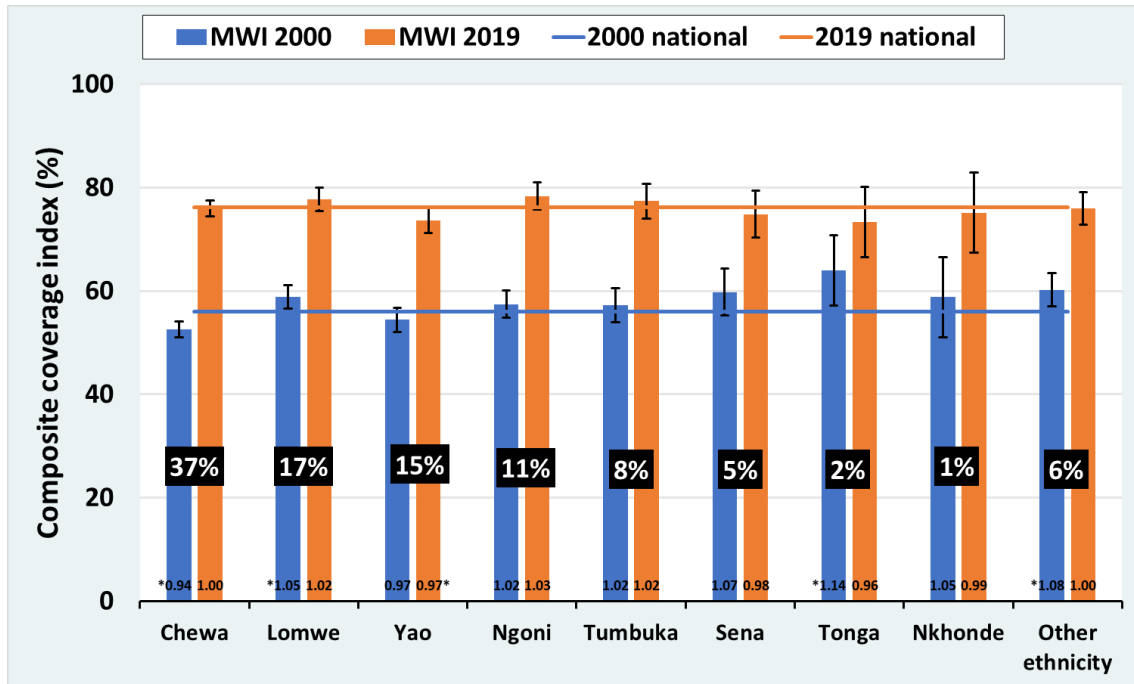

Mali

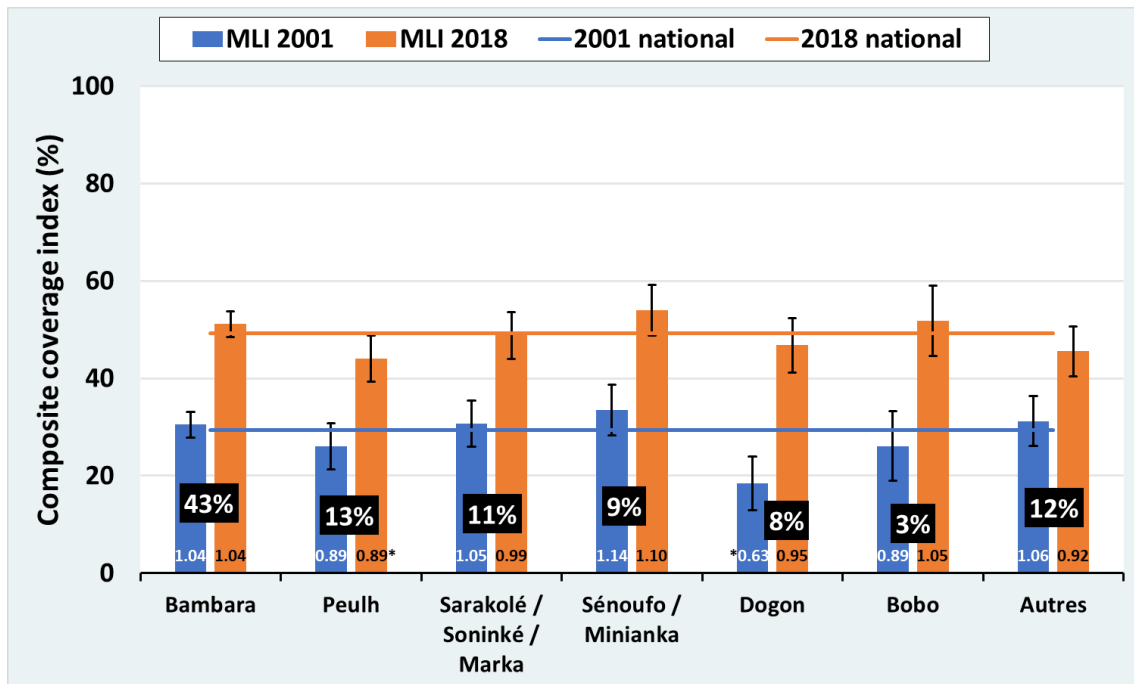

### Mauritania

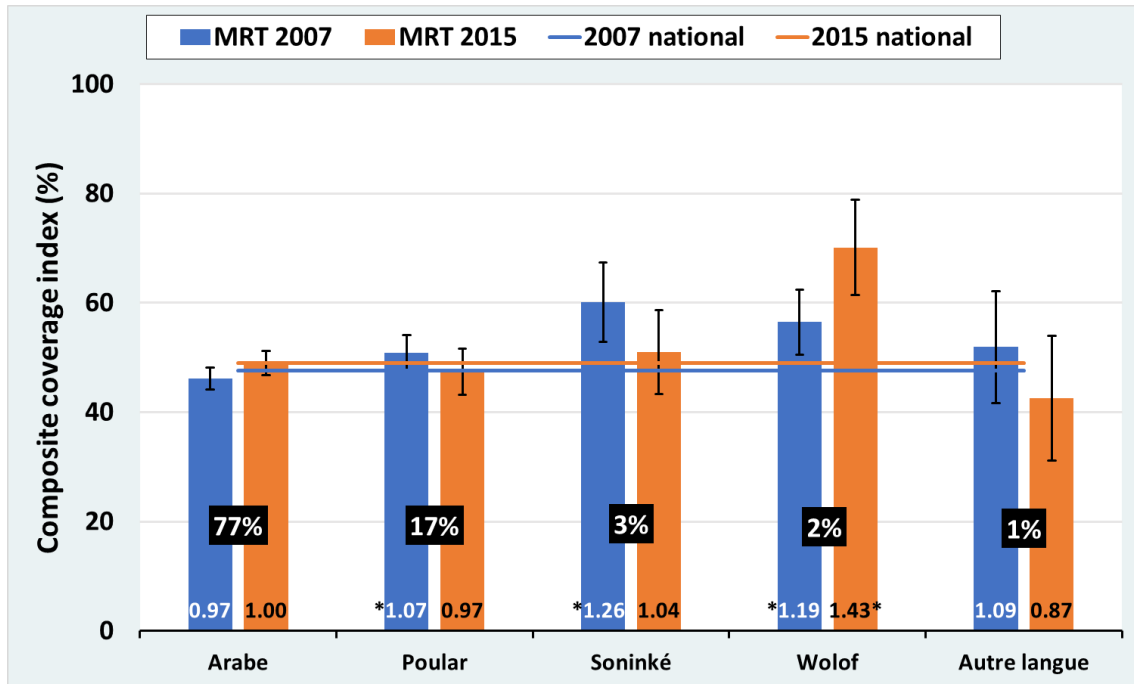

### Moldova

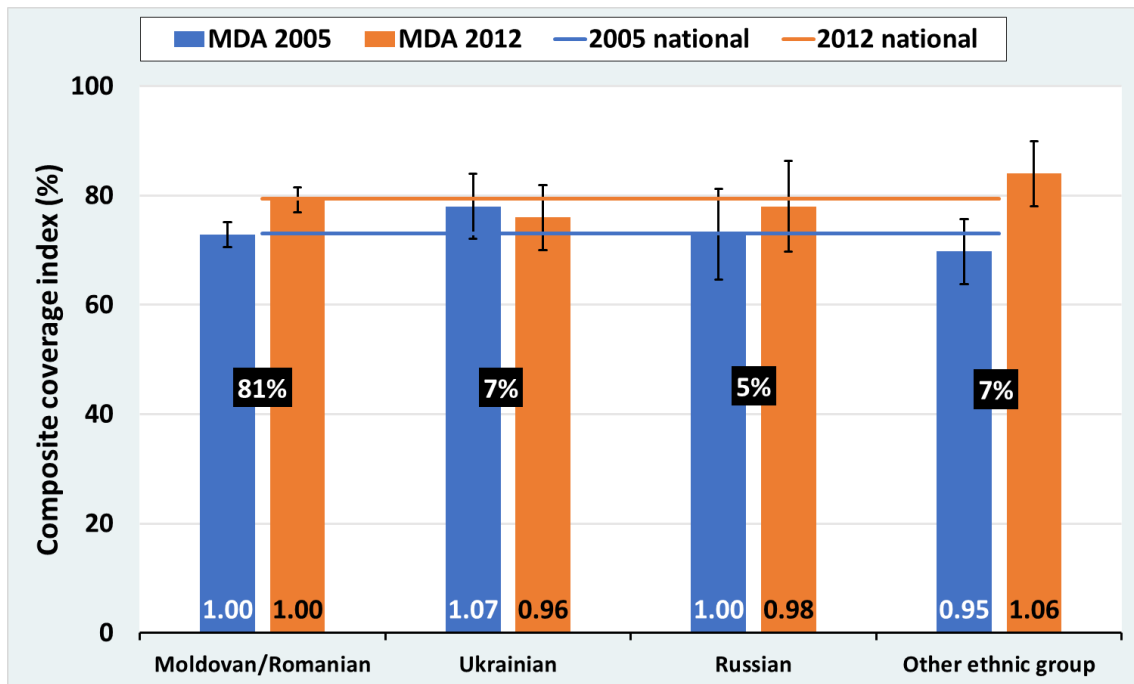

## Mongolia

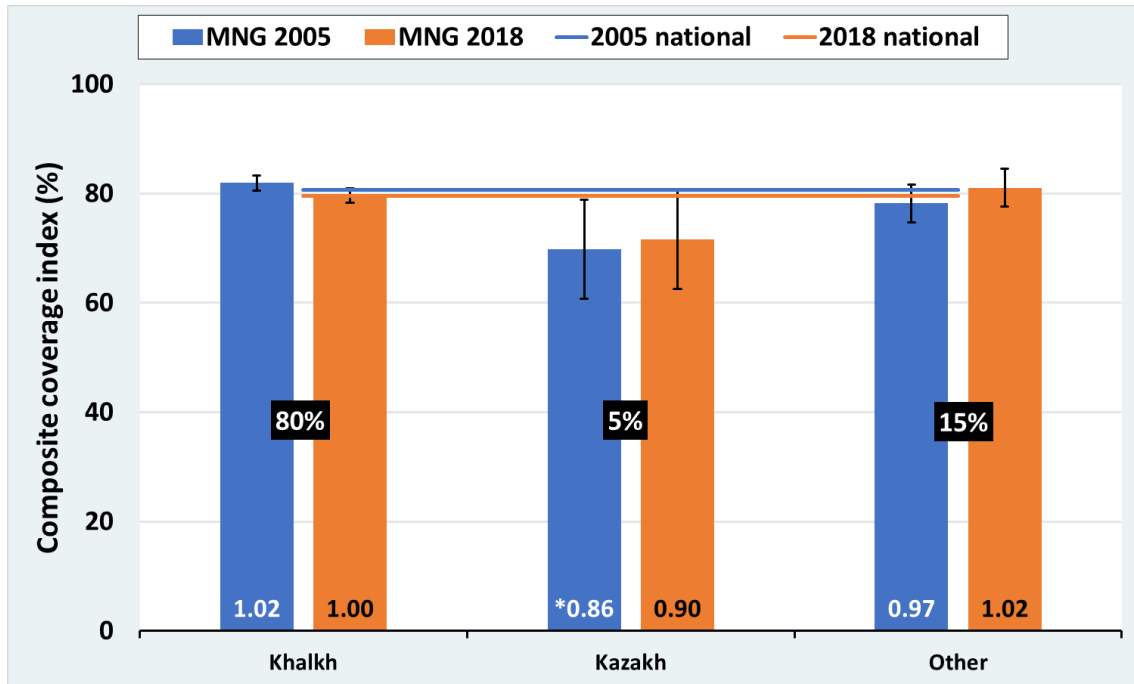

## Mozambique

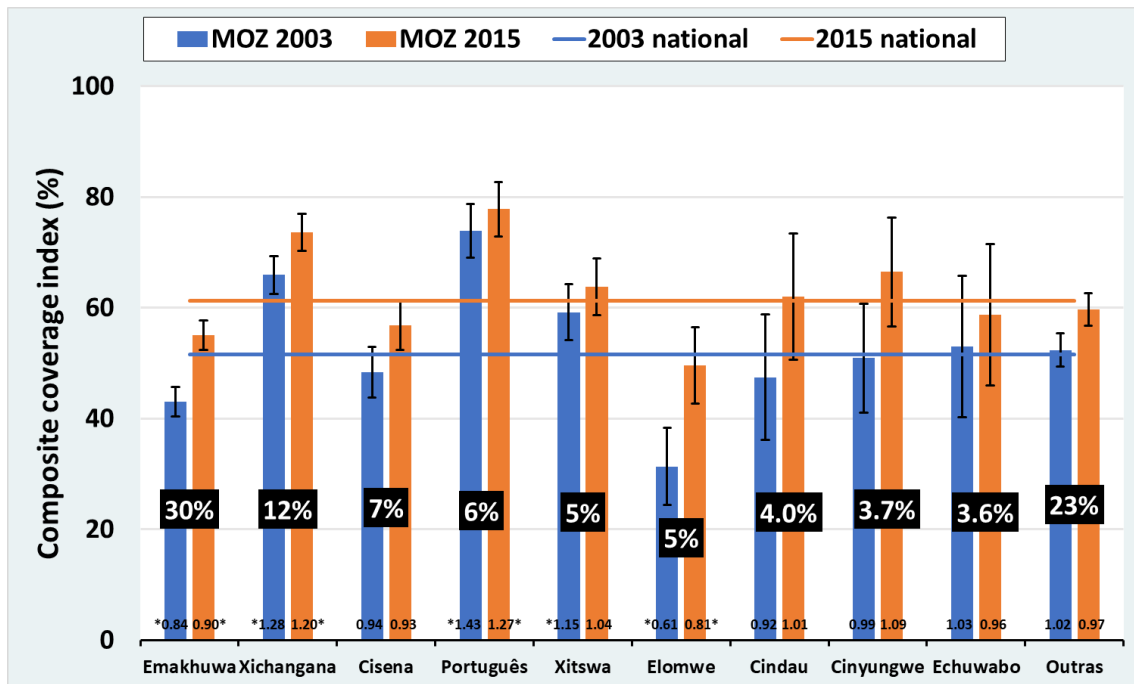

## Namibia

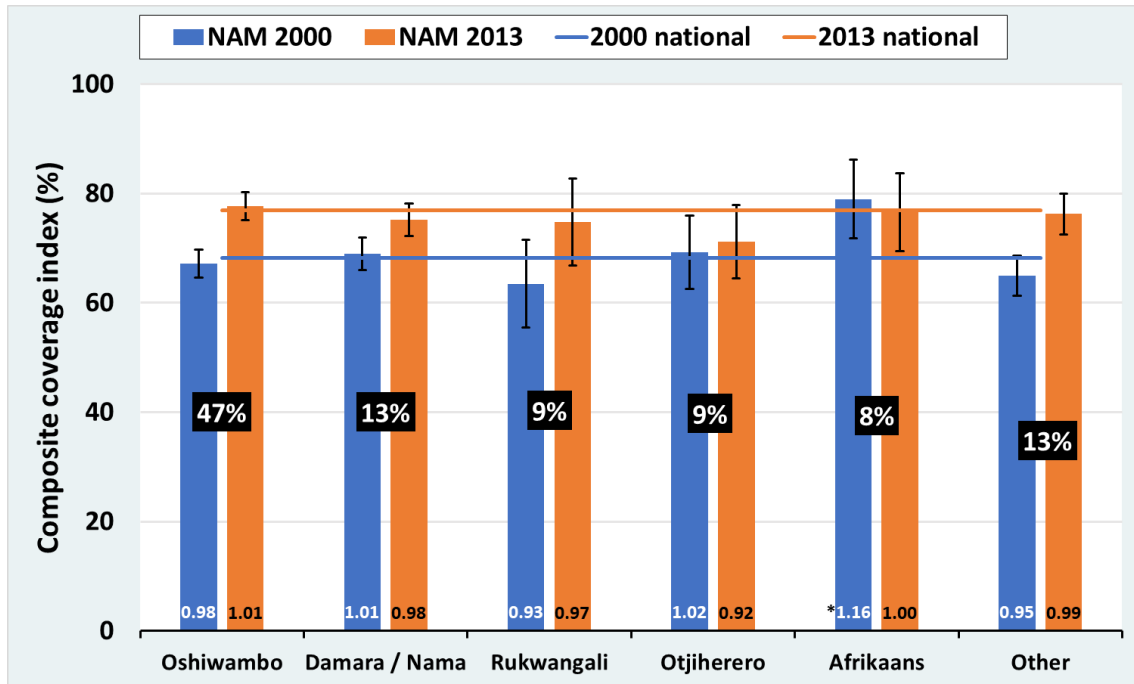

## Nepal

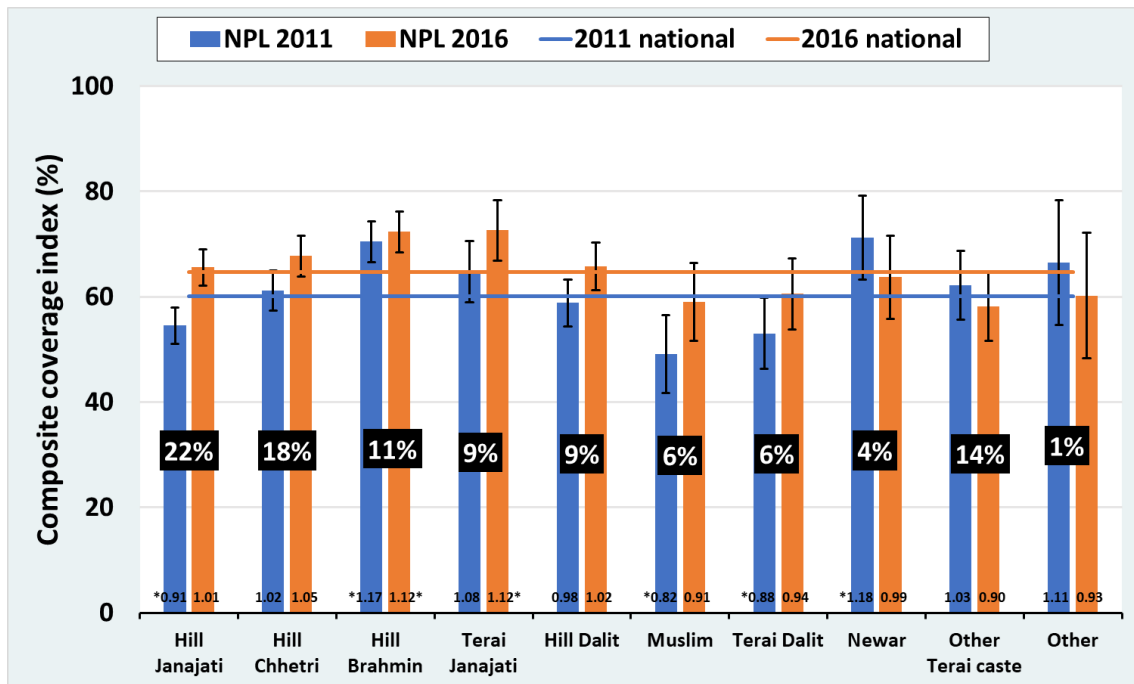



## Niger

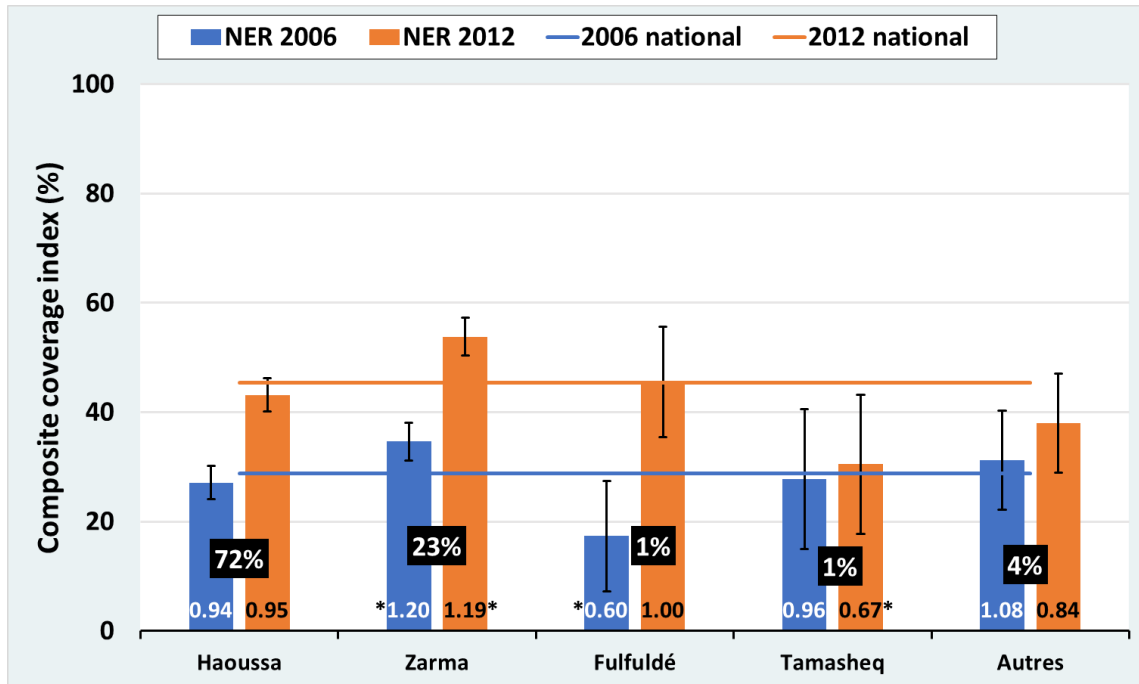

## Nigeria

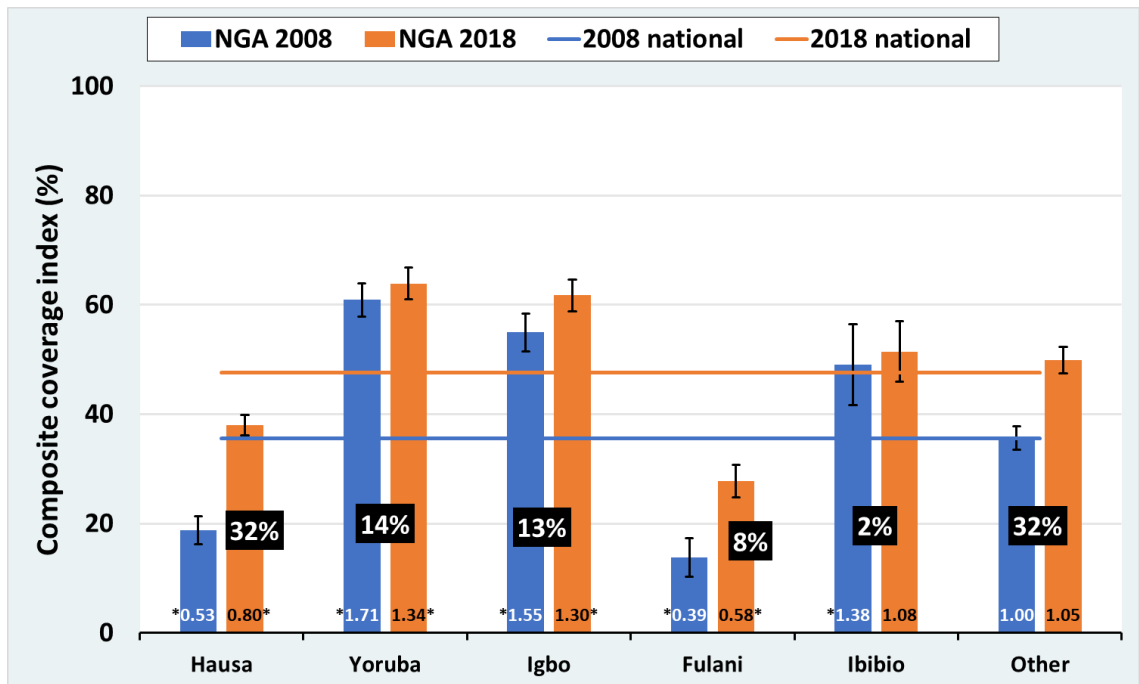

North Macedonia

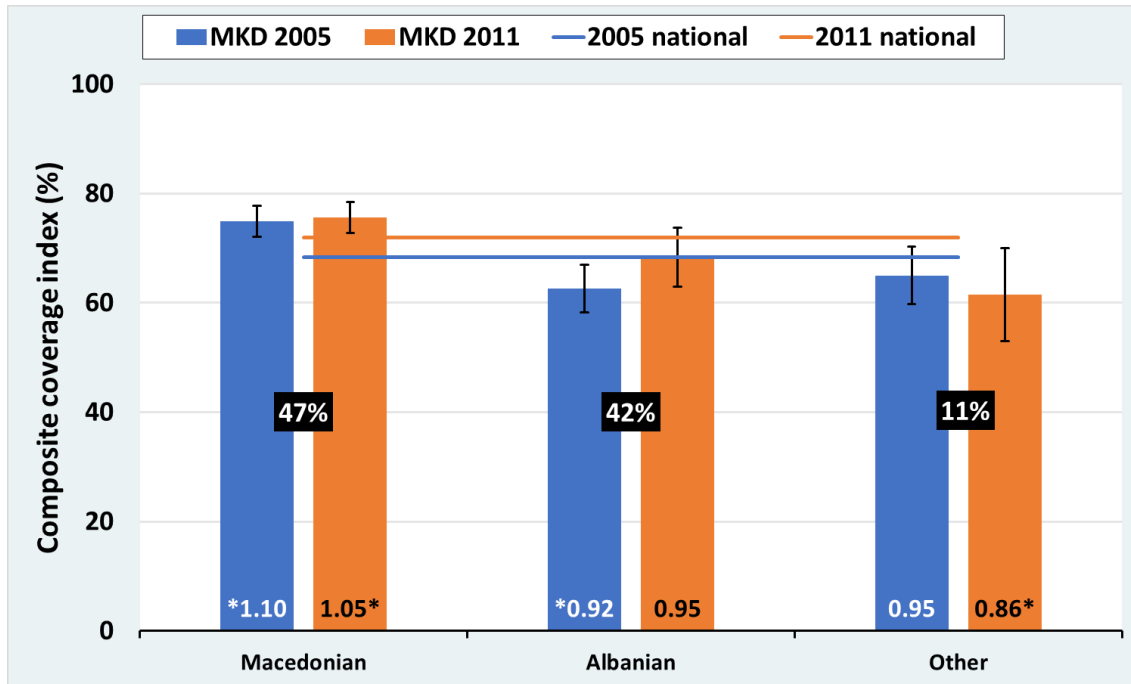

Pakistan

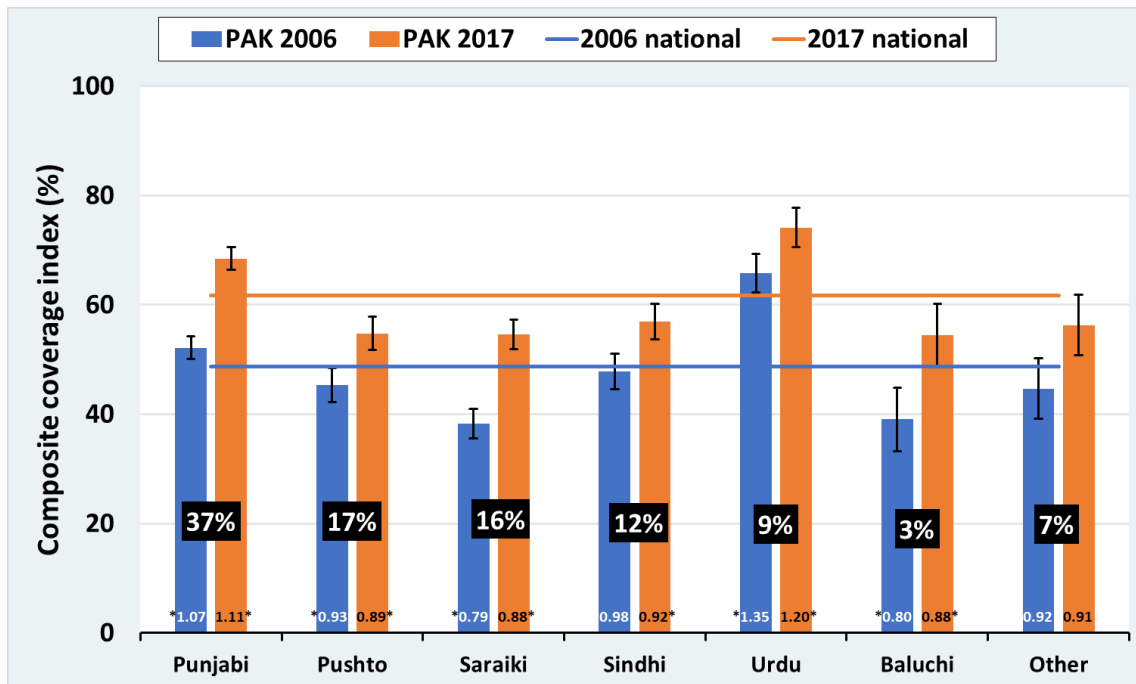

Peru

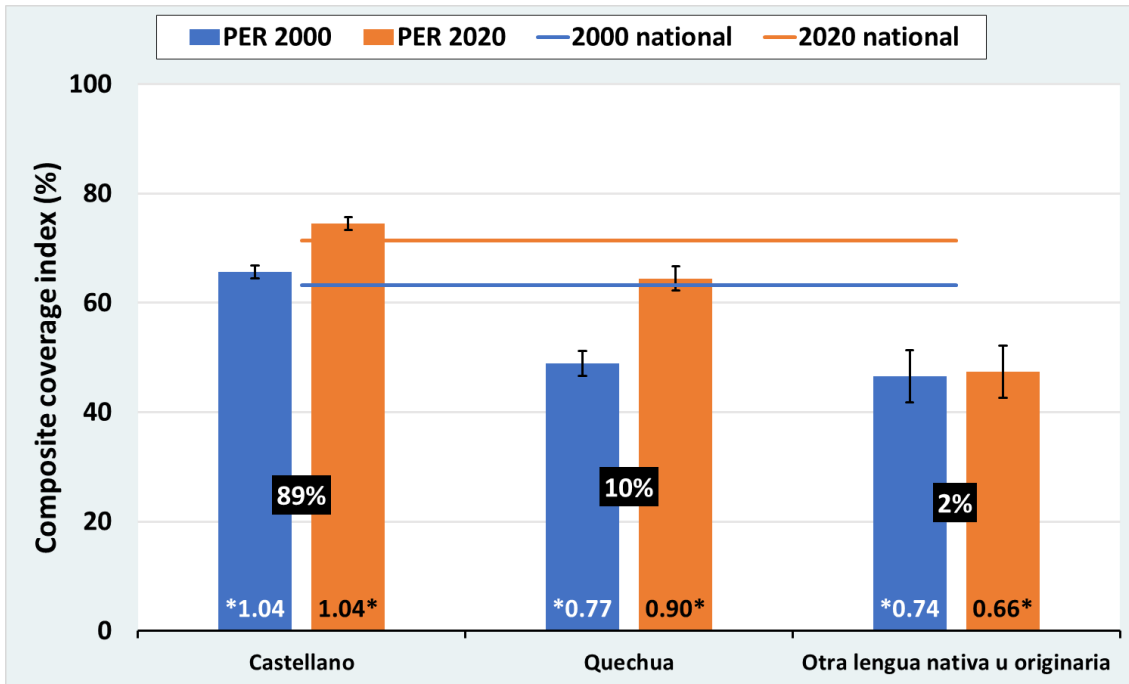

Philippines

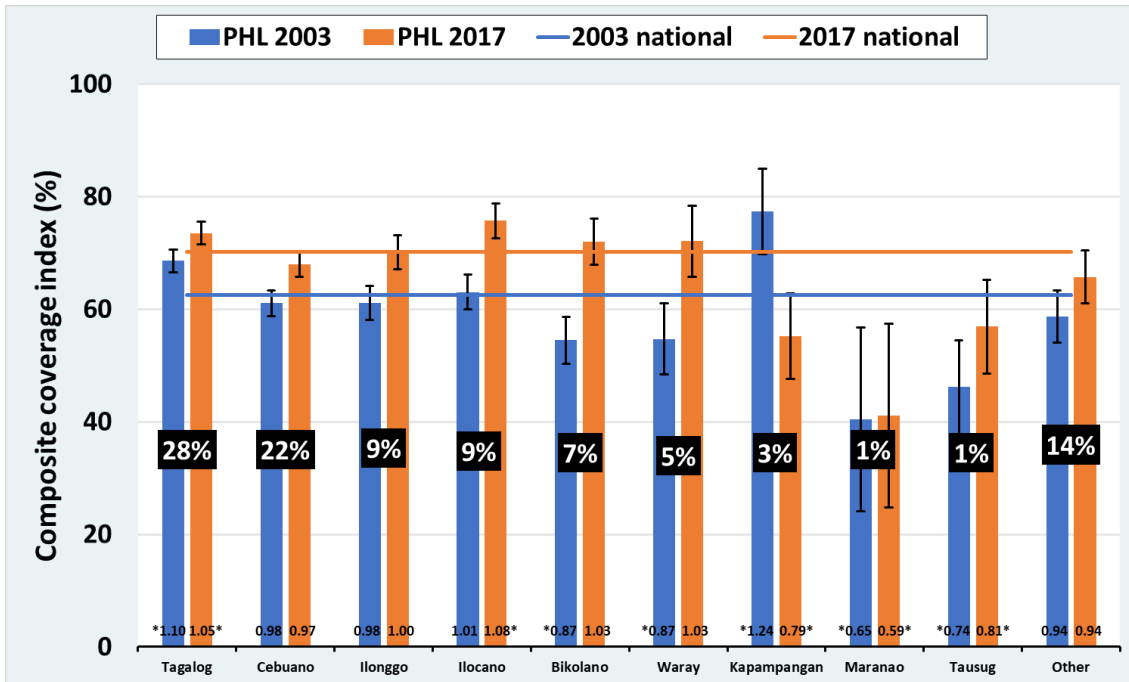

Sao Tome and Principe

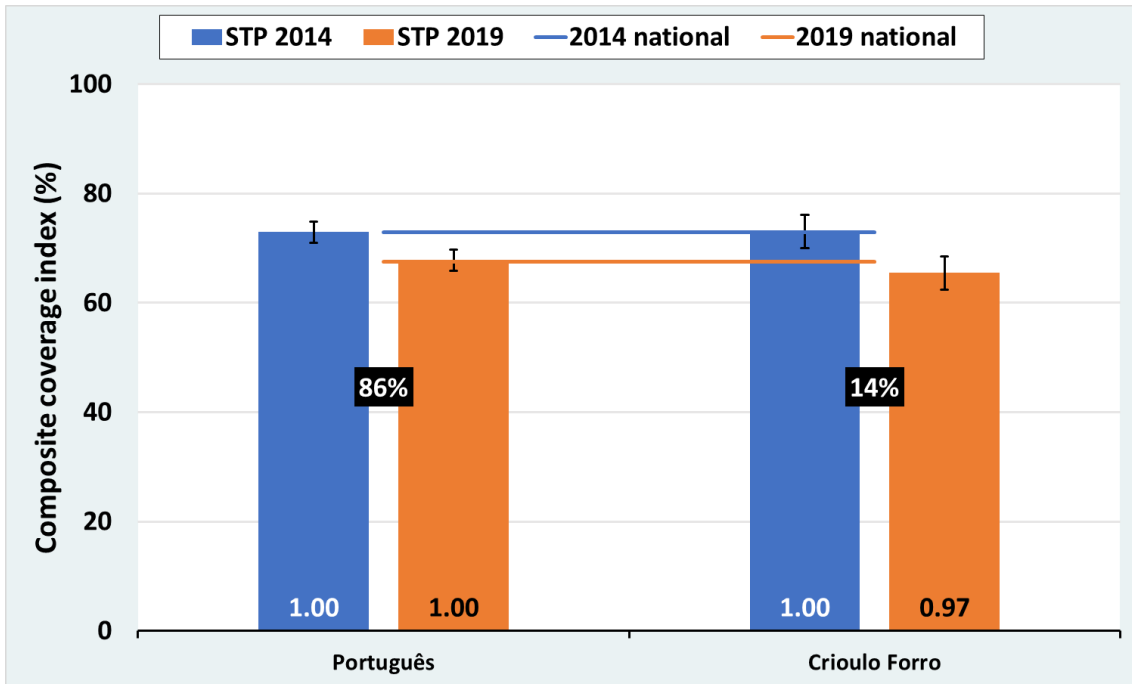

Senegal

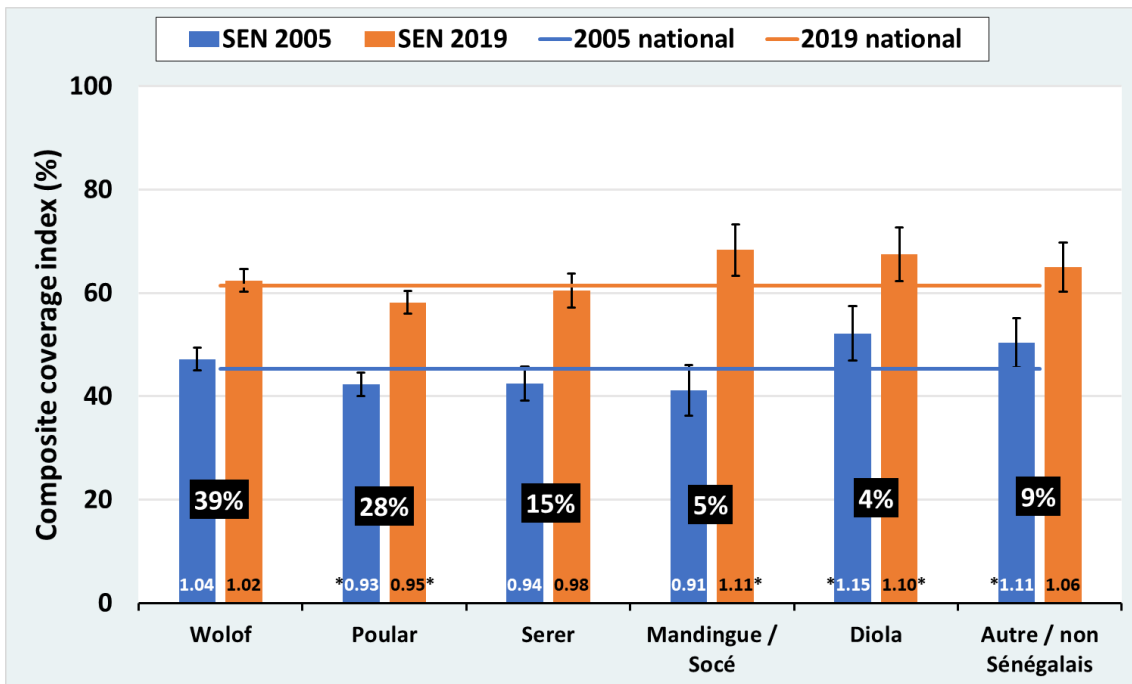

Sierra Leone

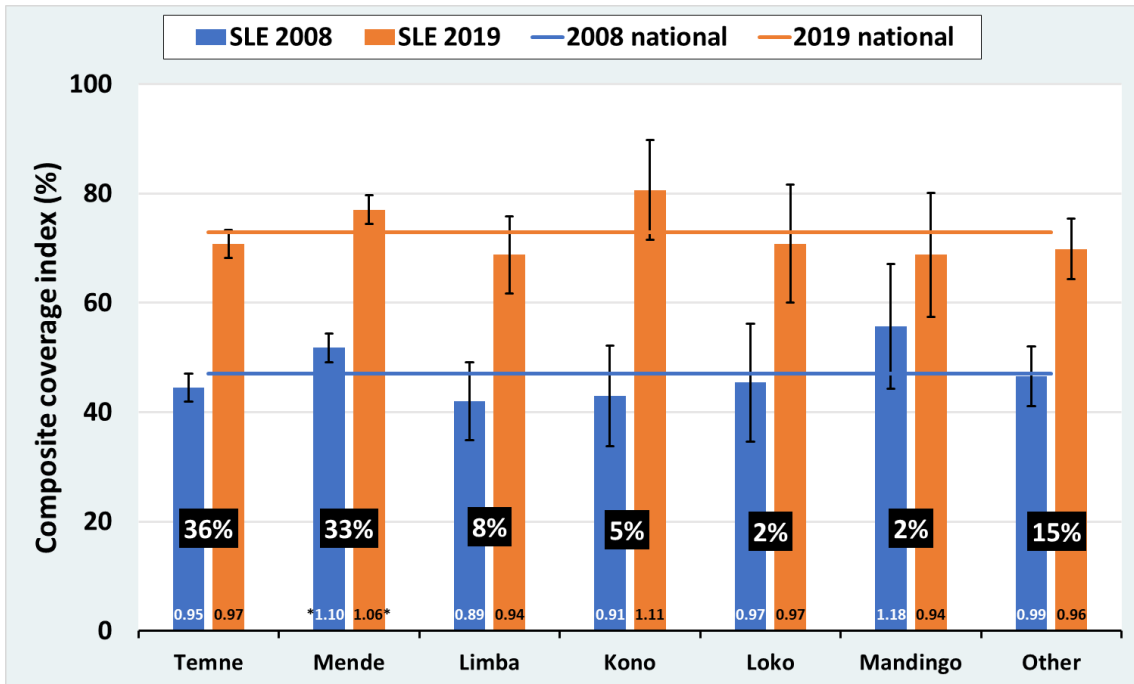

Tajikistan

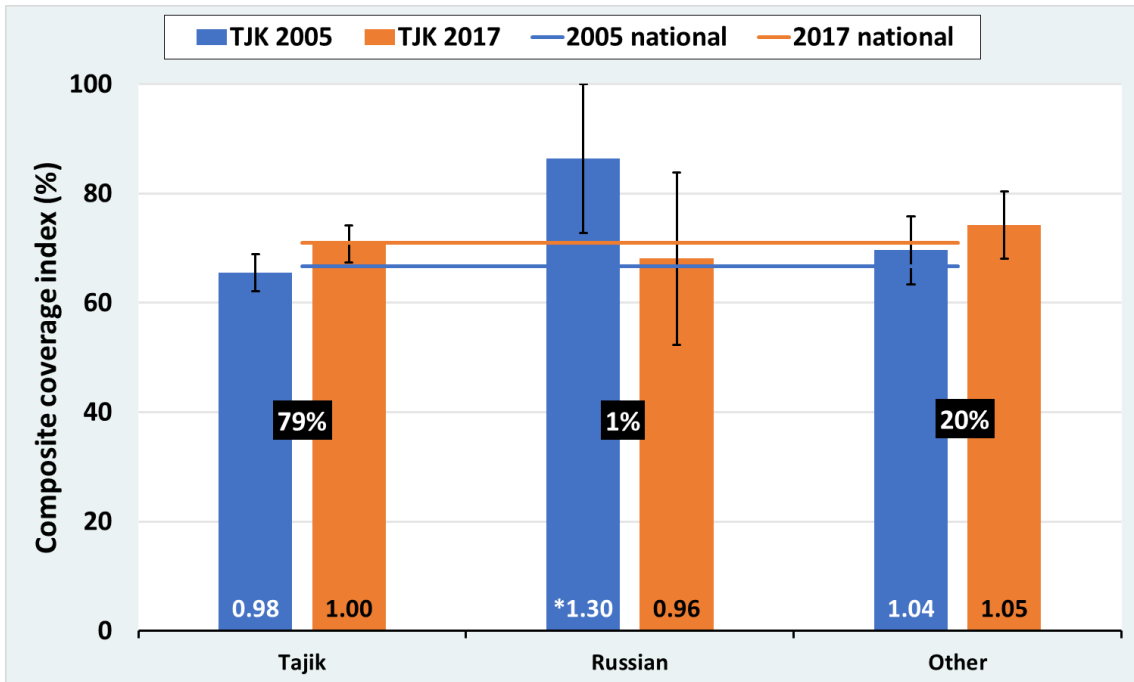

Timor-Leste

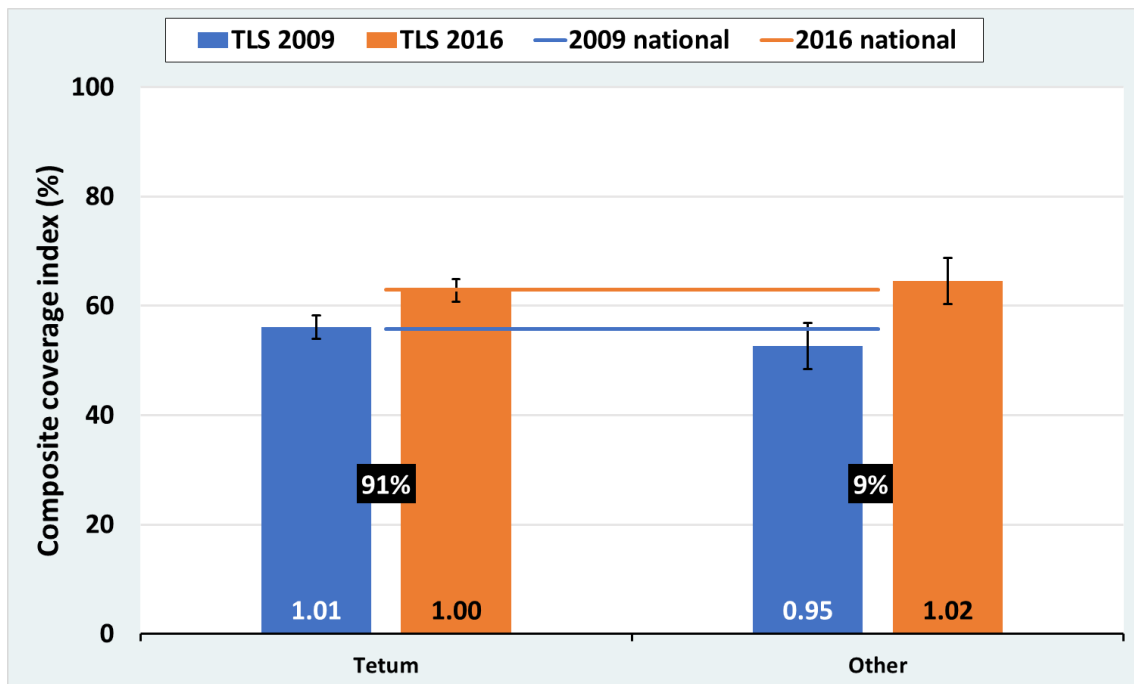

Togo

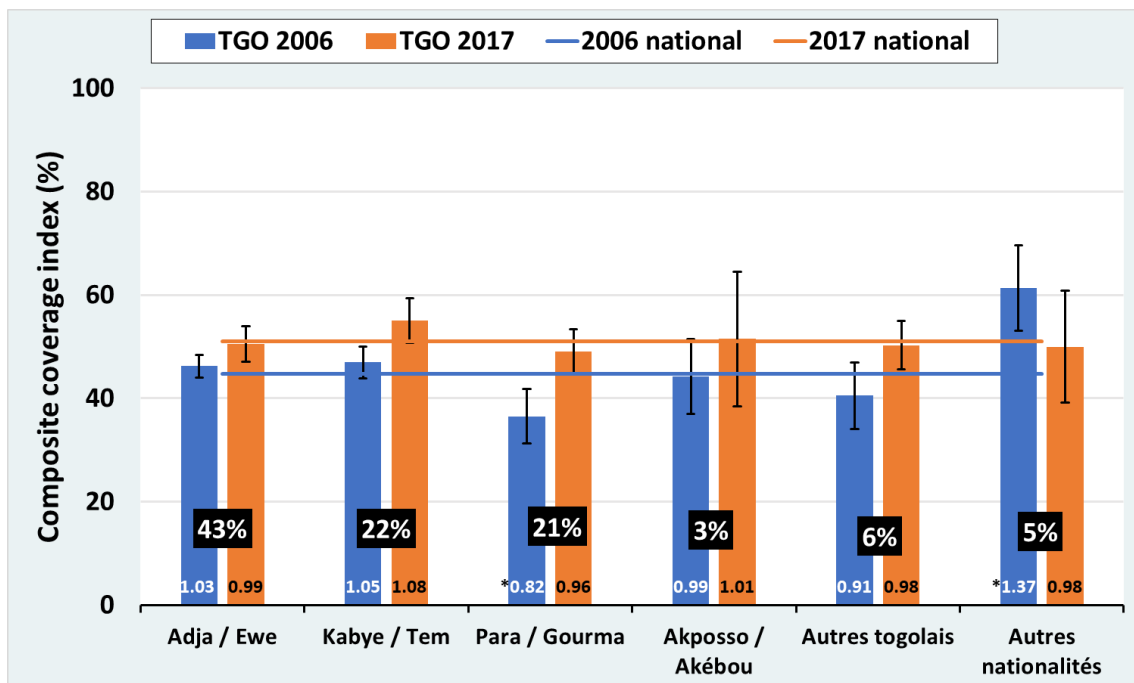

Turkmenistan

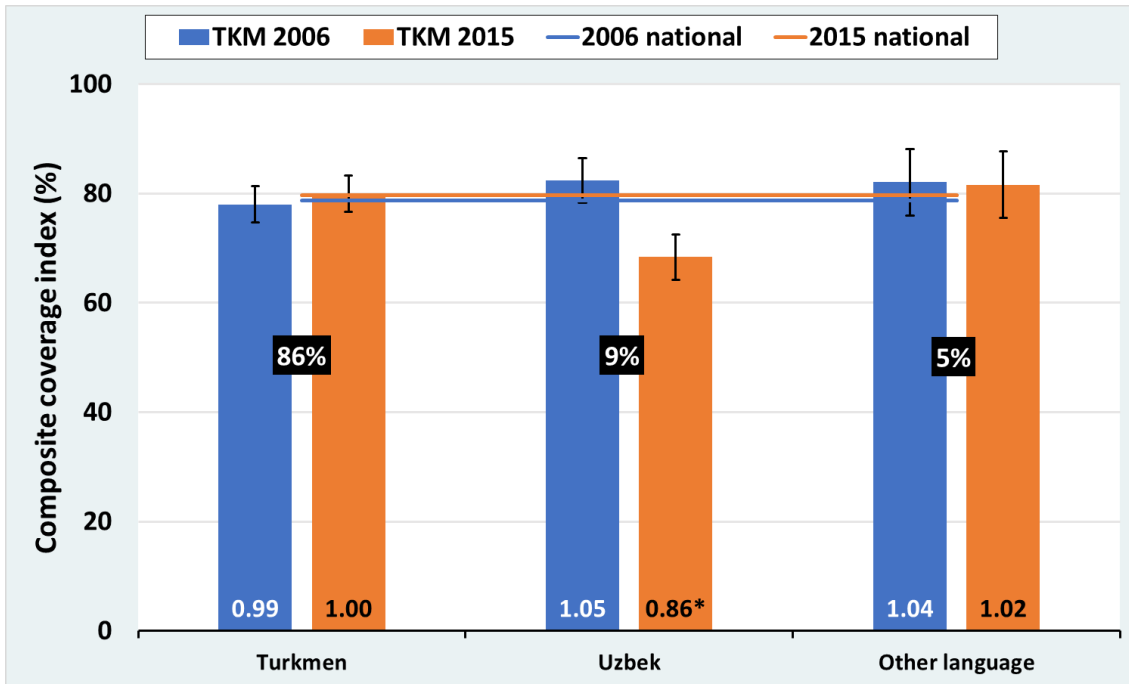

Uganda

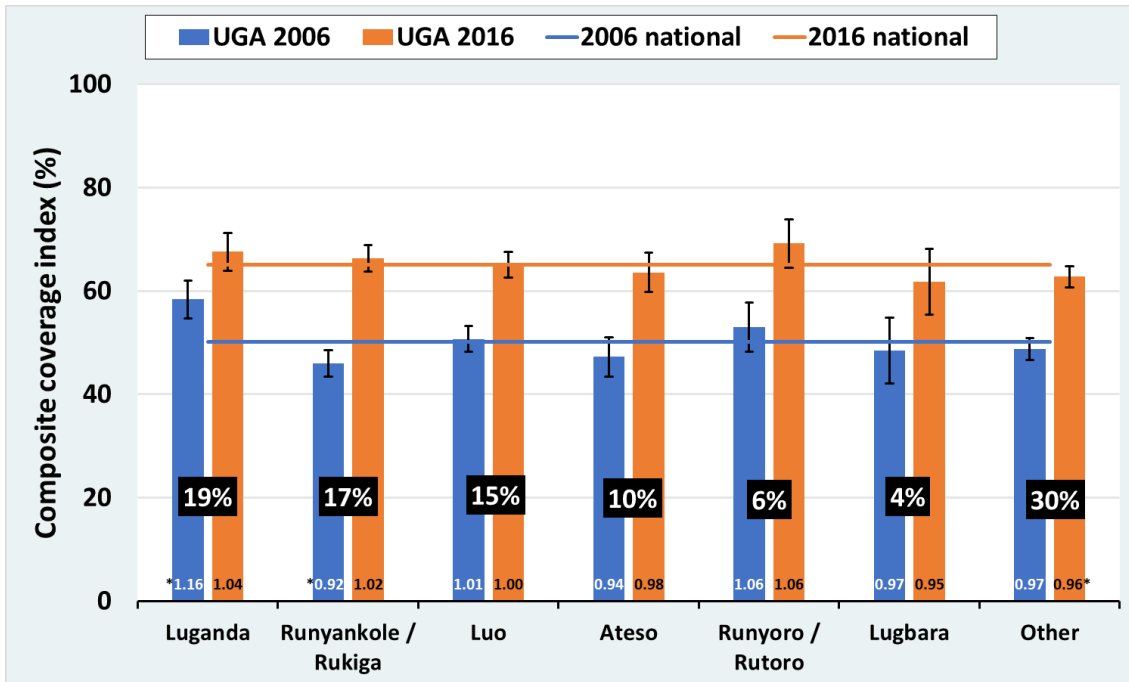

Vietnam

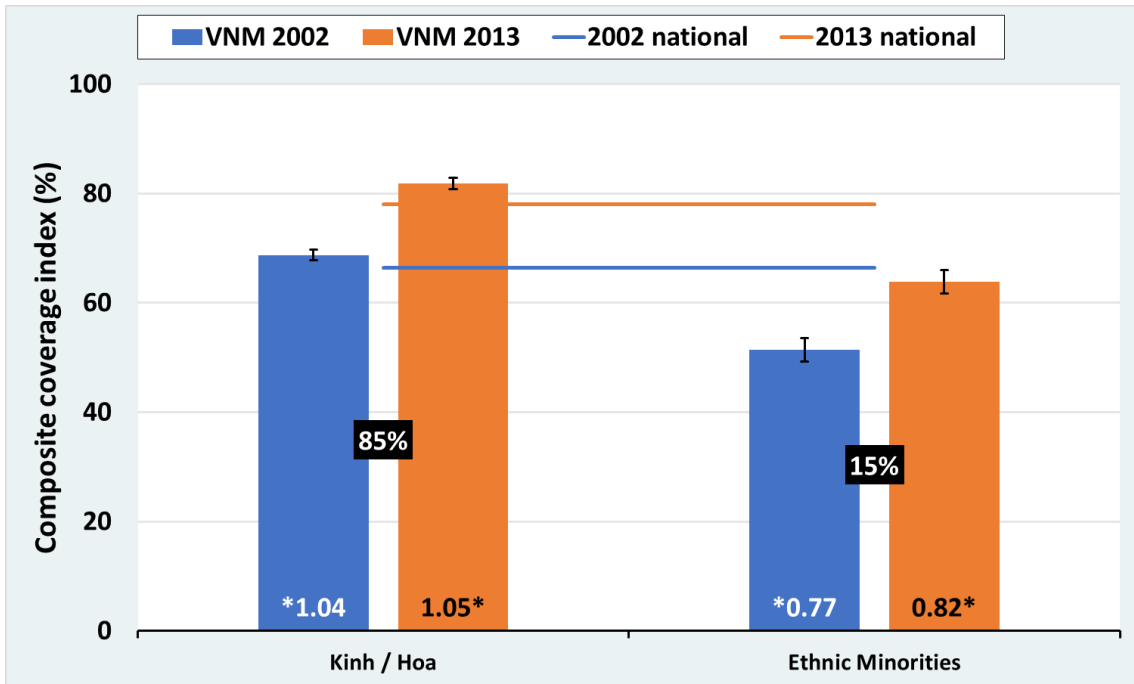

Zambia

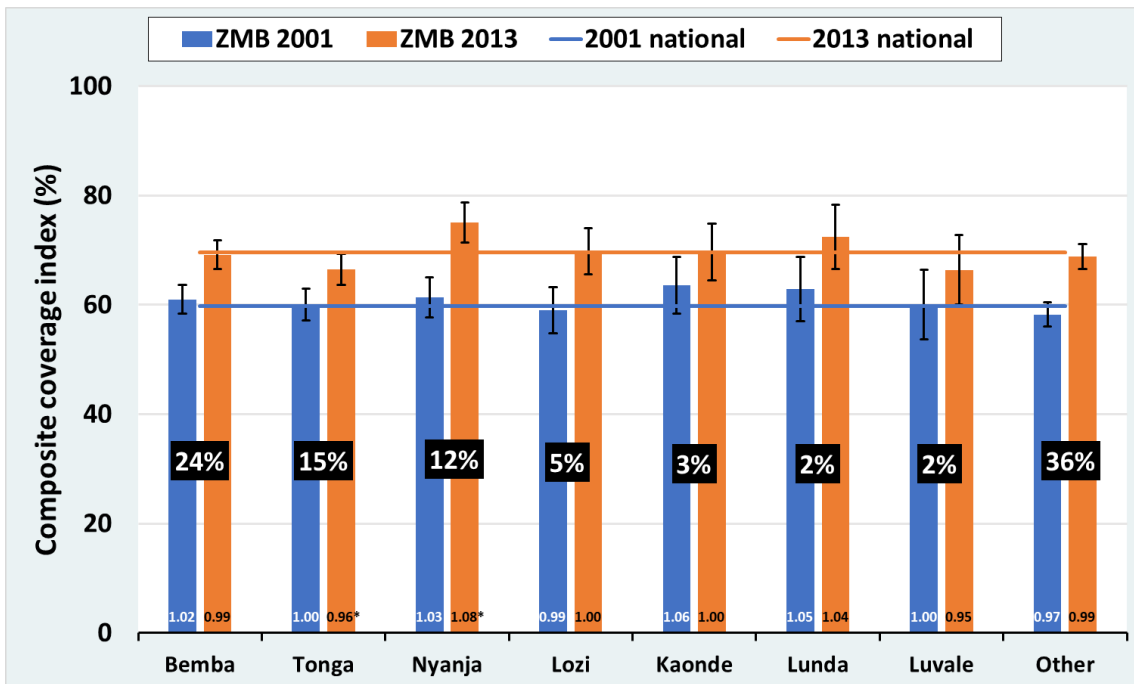

Supplement: MOESM5 [file 25296702]
