# Supplementary material for: Time trends in ethnic inequalities in child health and nutrition: analysis of 59 low and middle-income countries
Source: Springer Nature journal article supplement (doi:10.1186/s12939-023-01888-5), 2023-04-28

Supplementary figures 3. Under-five mortality rate by ethnic groups in the first and last surveys. Results for selected countries. The numbers in the black rectangles show the average proportion of the samples for each ethnic groups in the two surveys. The numbers at the bottom of the bars show the ratio between the rate in a particular ethnic group and the national rate for that point in time (\* statistically significant in relation to the respective national average).

Albania

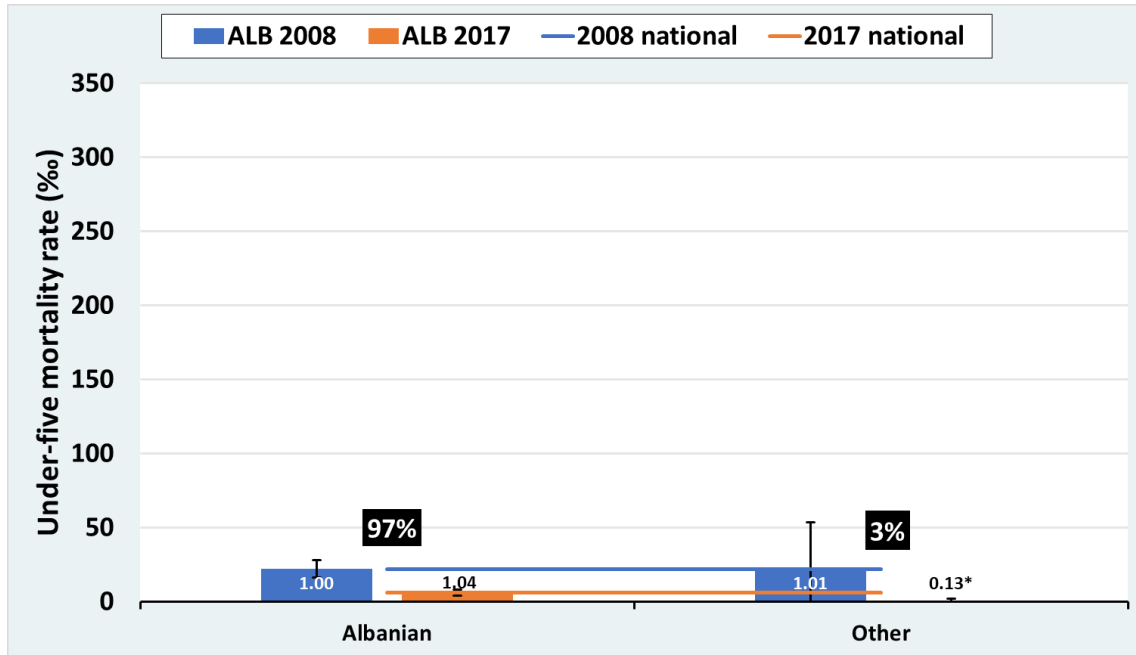

Benin

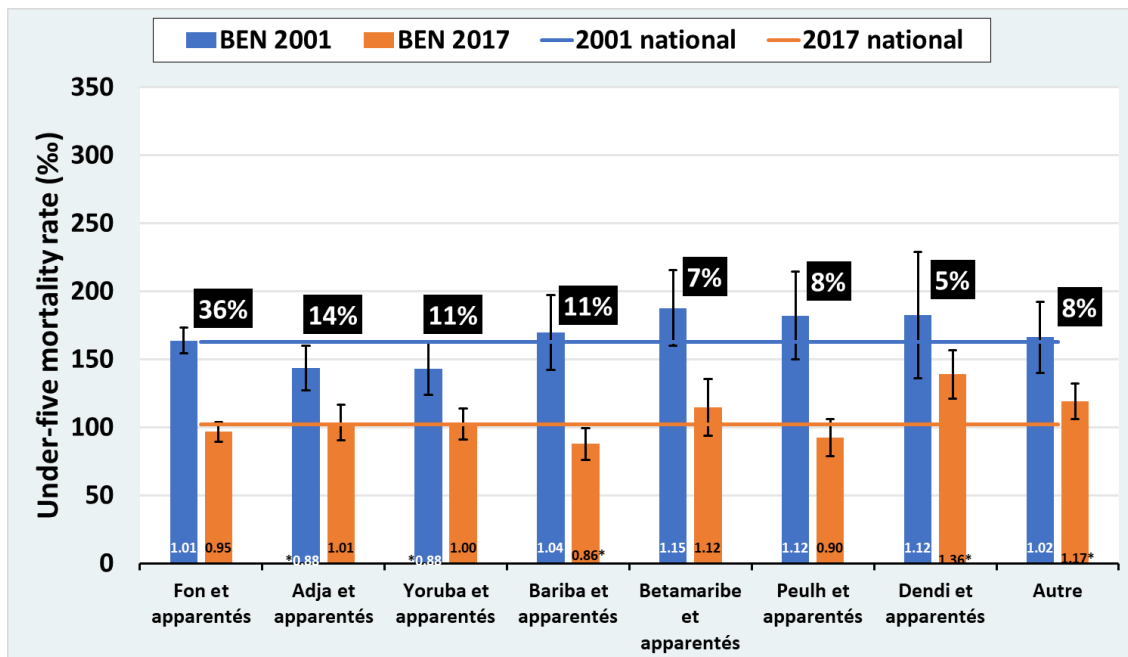

## Burkina Faso

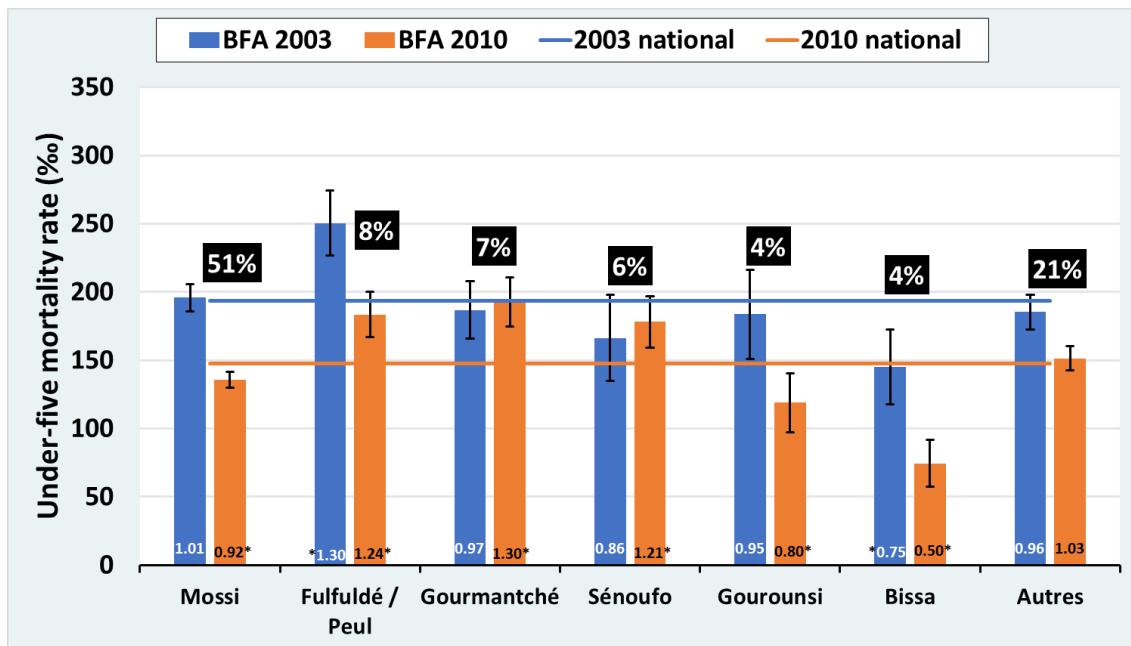

## Cameroon

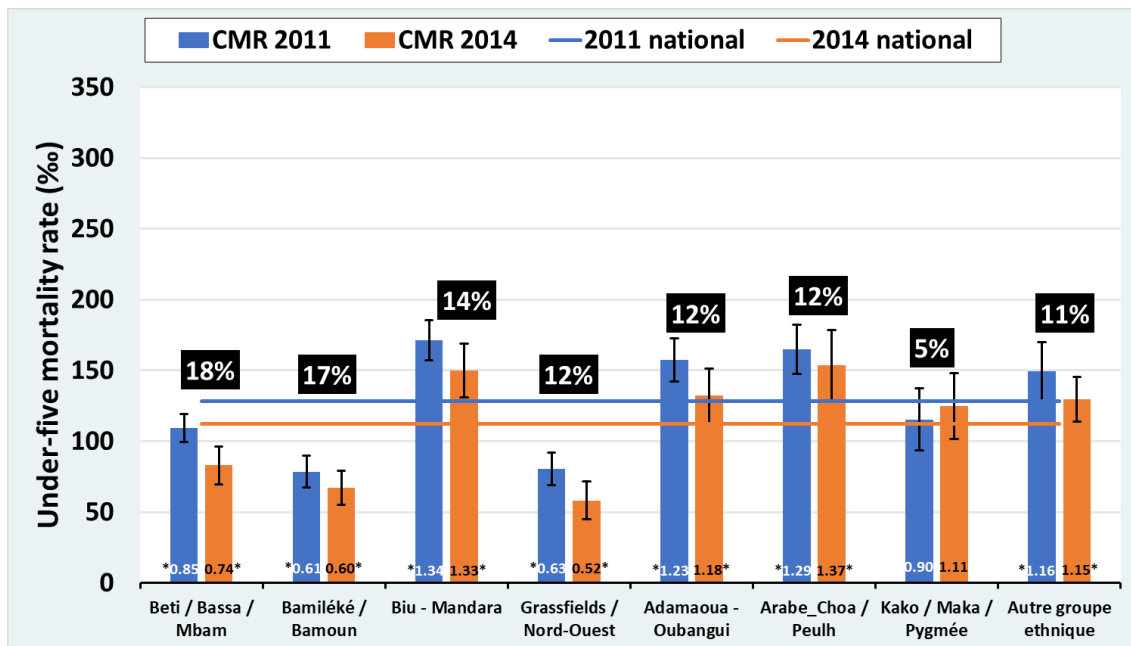

Chad

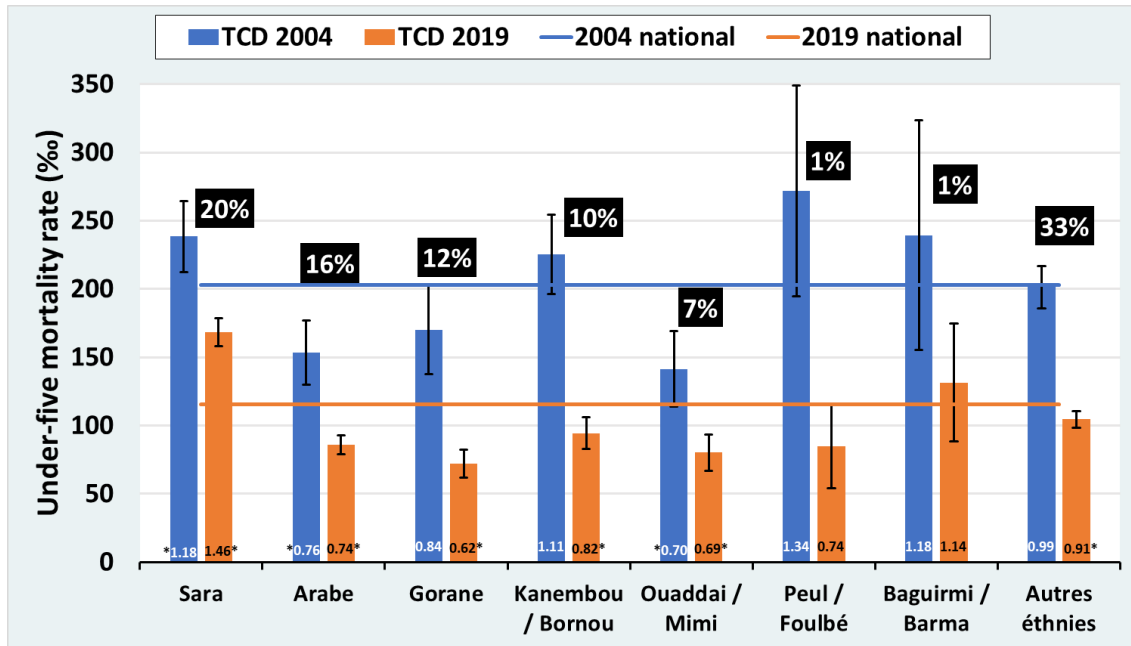

Colombia

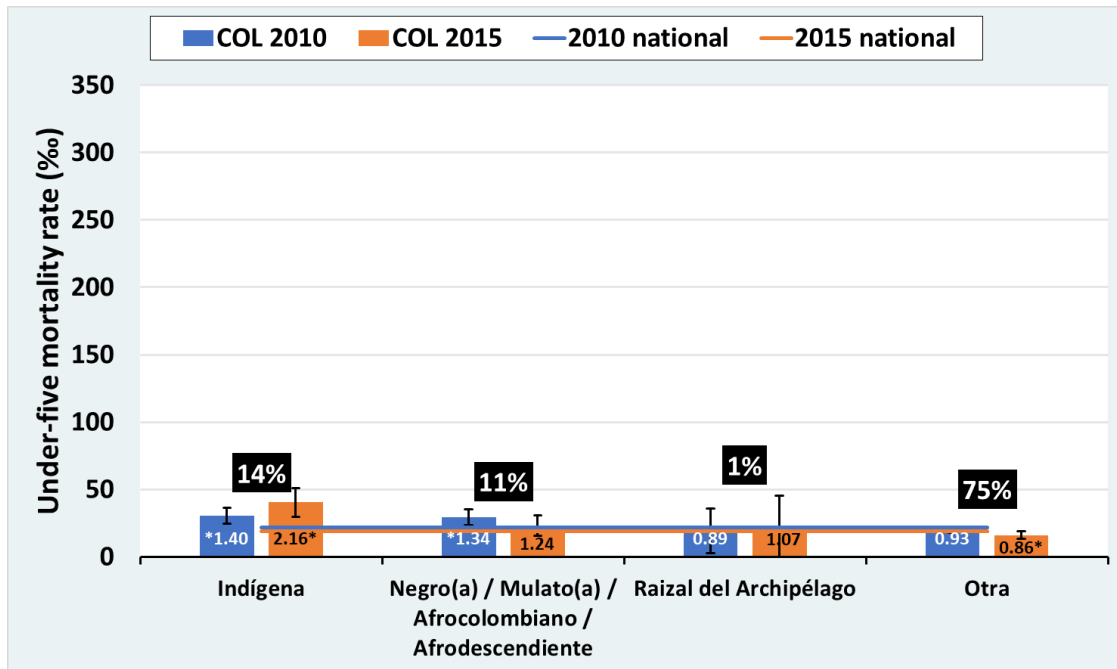

### Congo DR

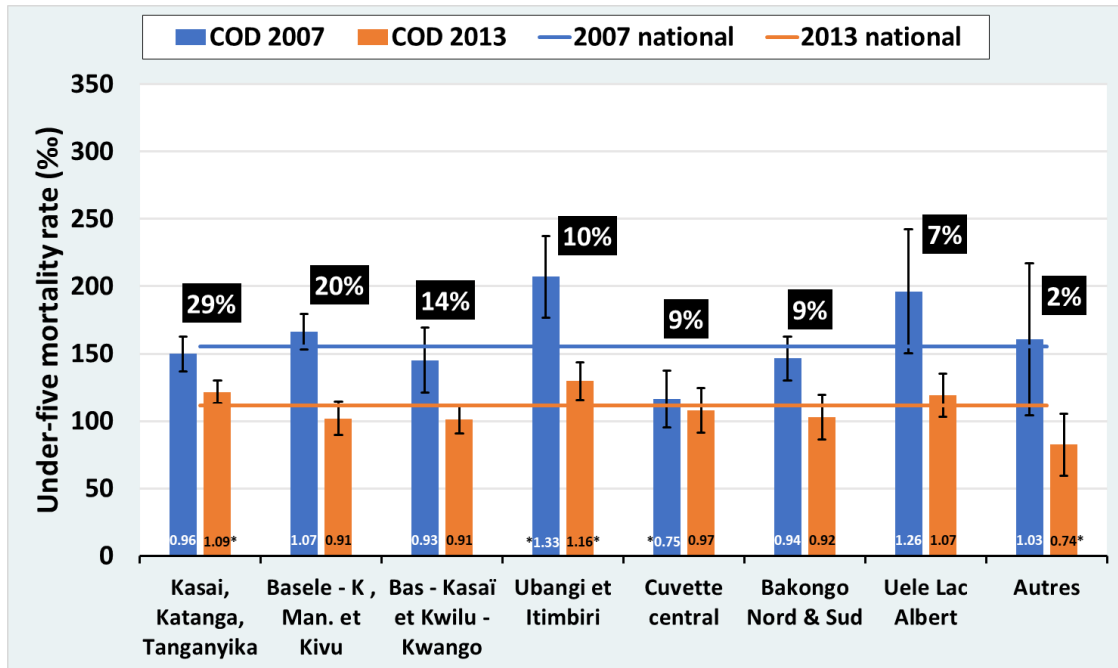

### Congo Republic

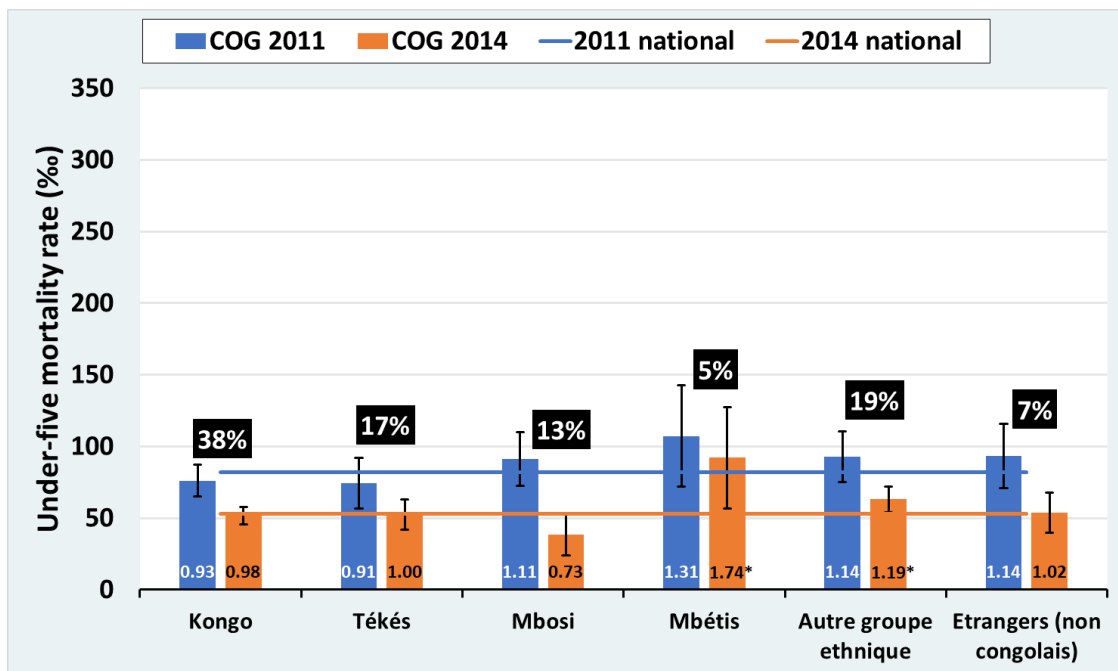

### Dominican Republic

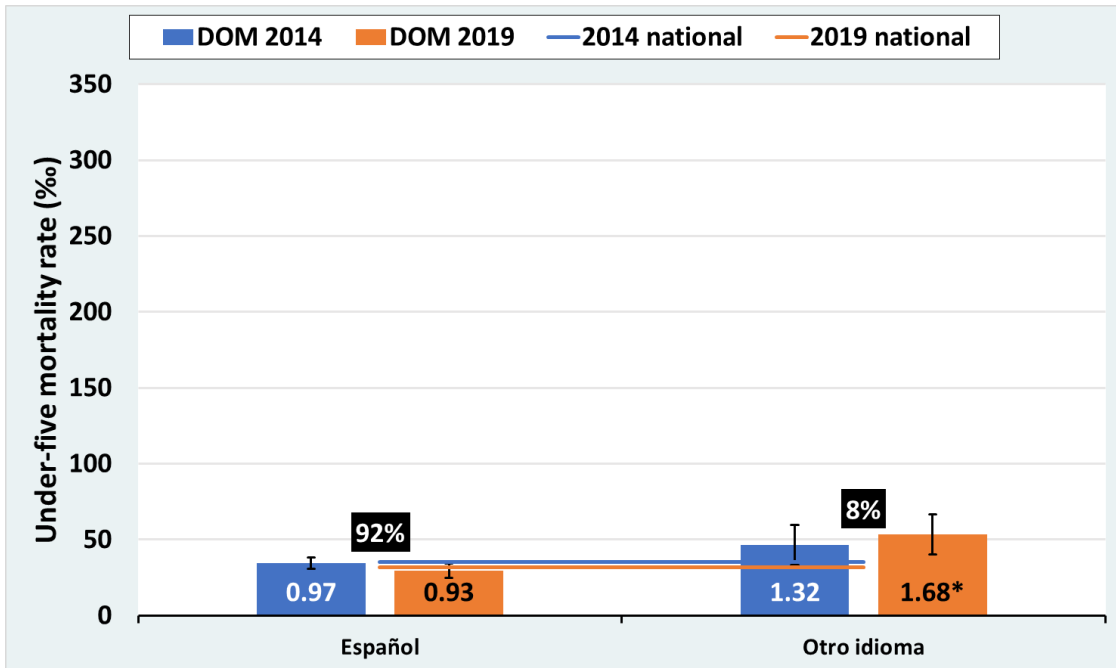

### Ethiopia

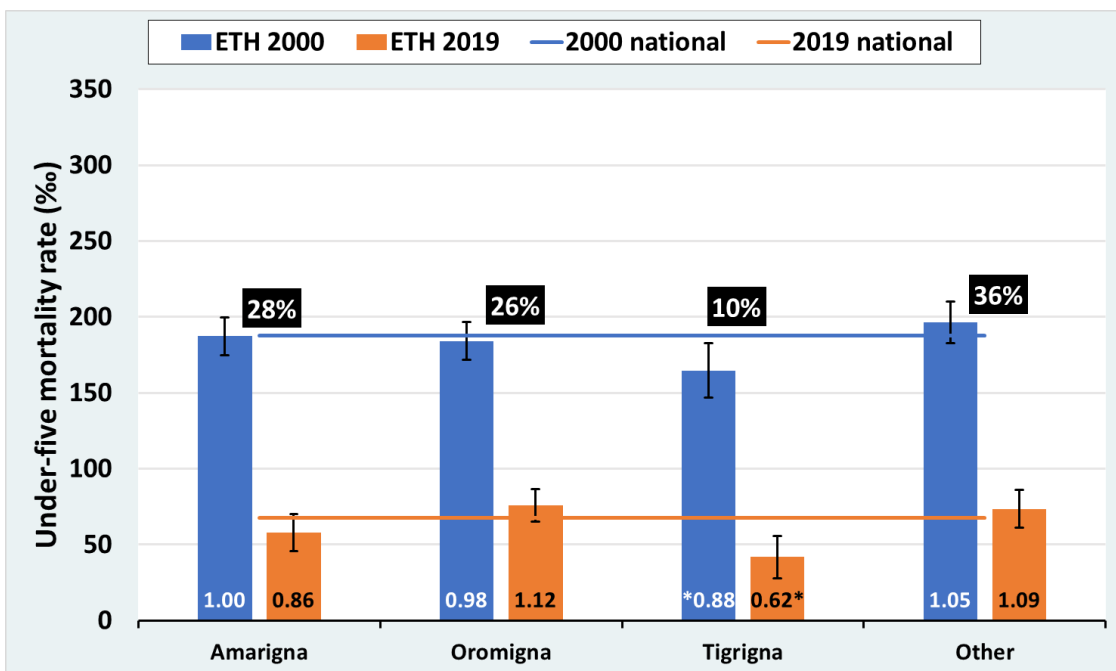

## Gabon

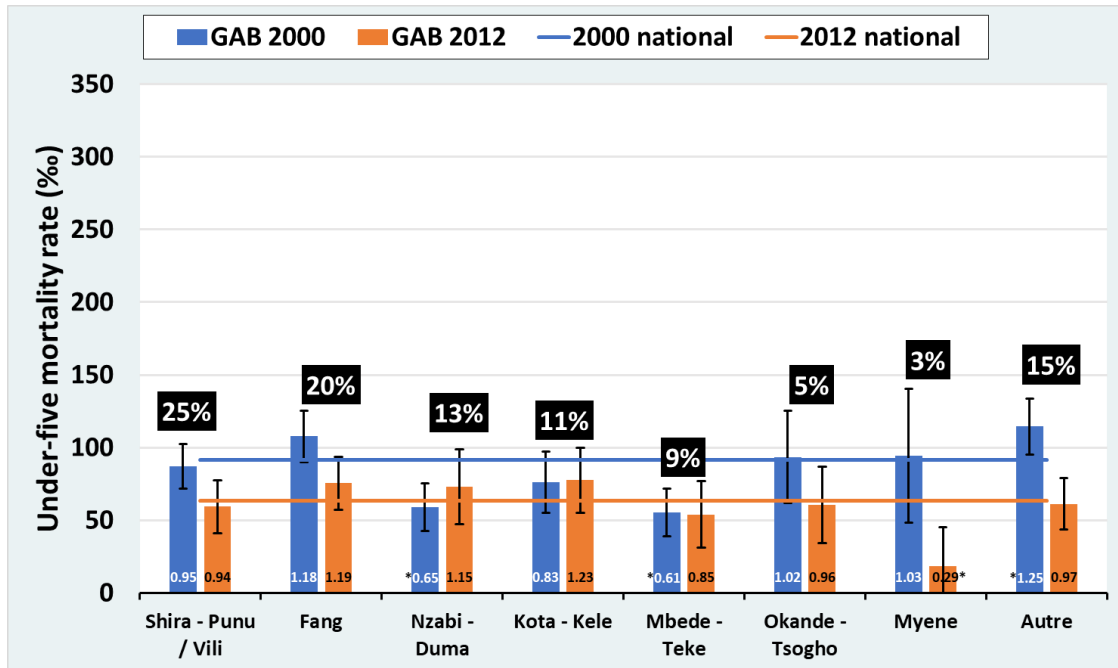

## Gambia

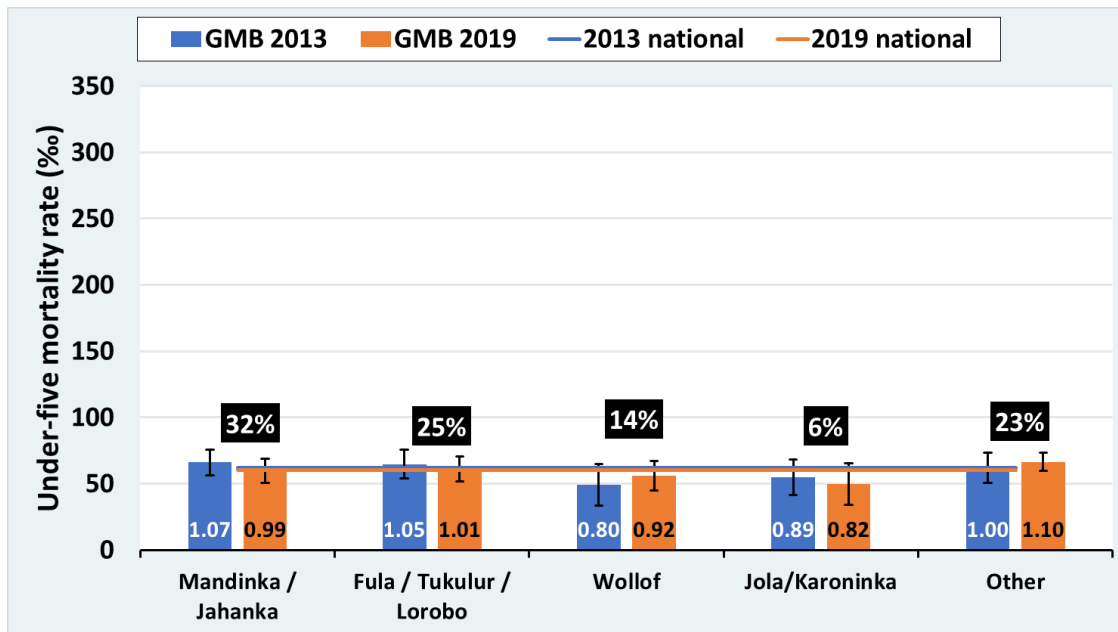

## Ghana

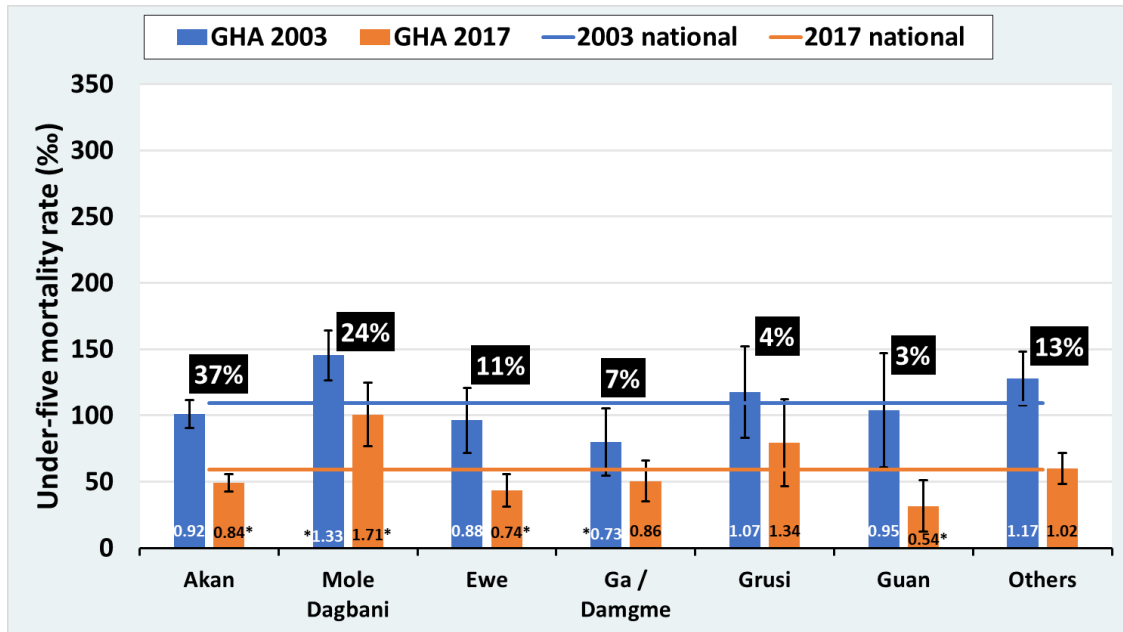

## Guinea

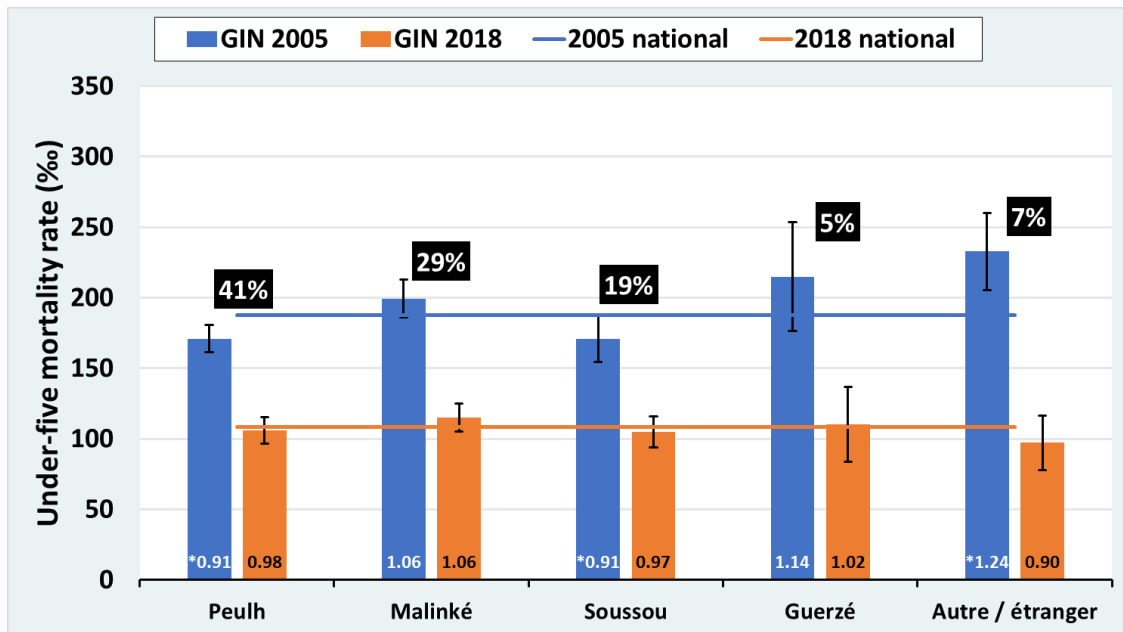

### Guyana

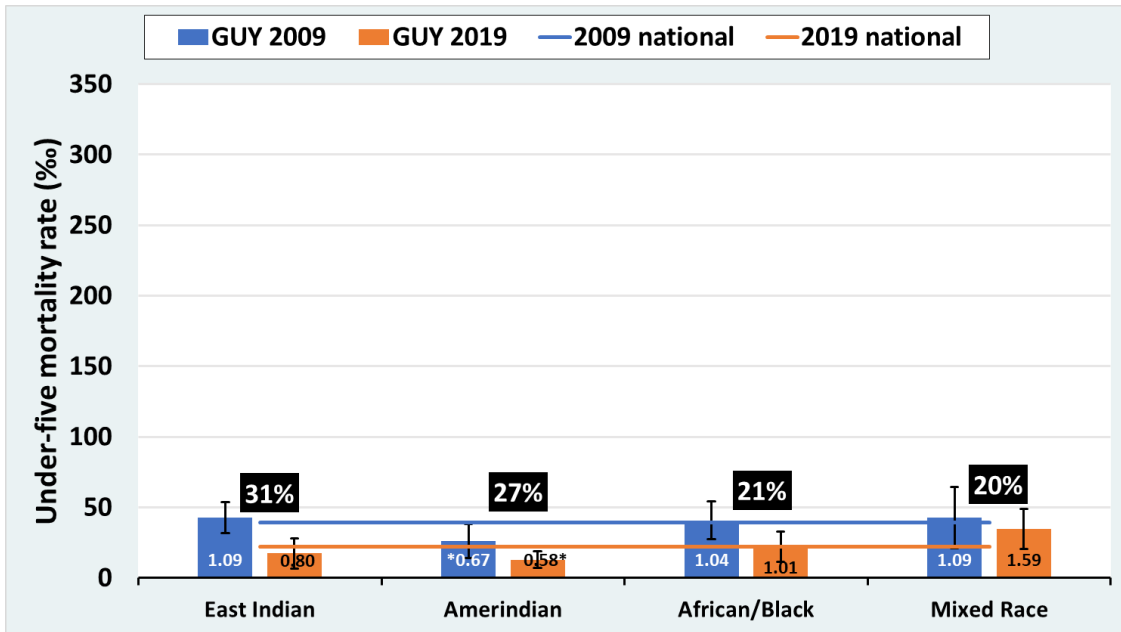

### Honduras

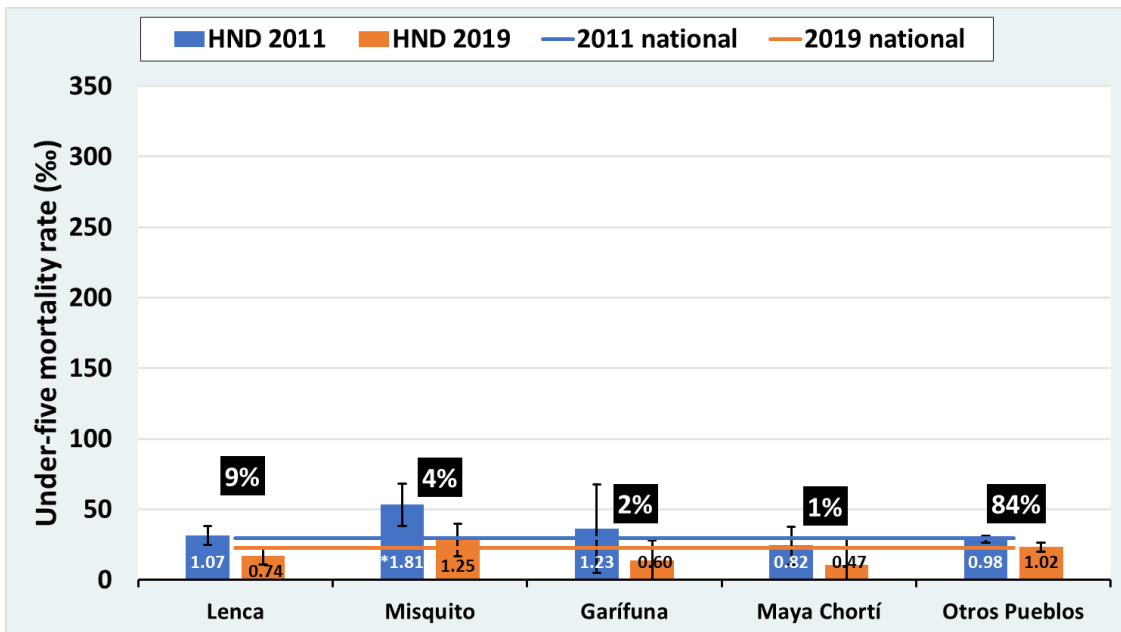



## India

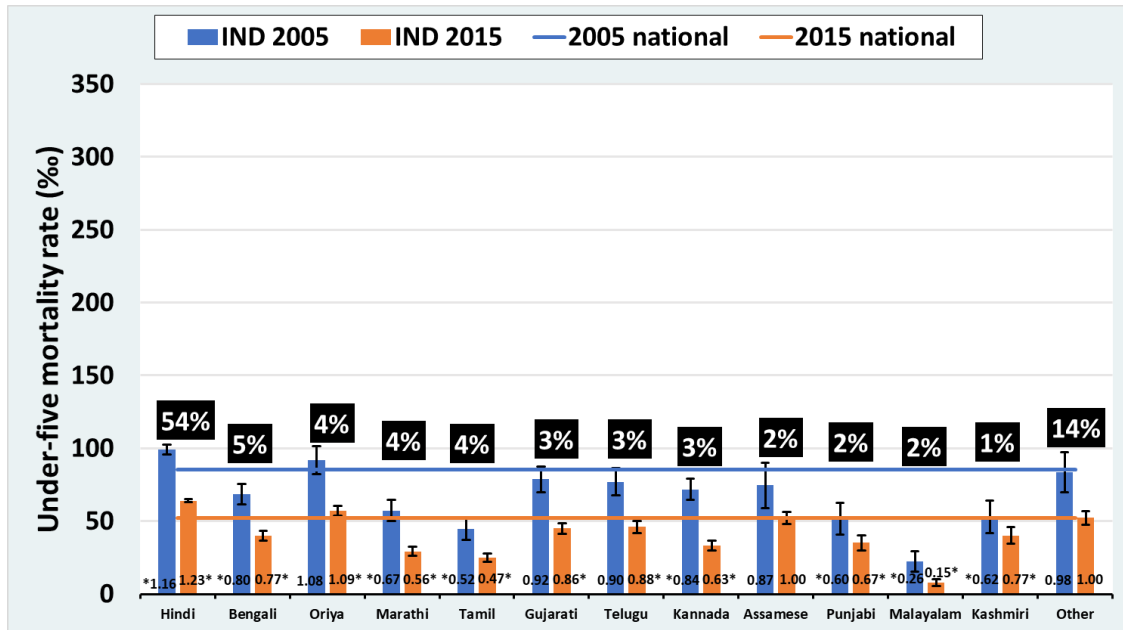

## Kenya

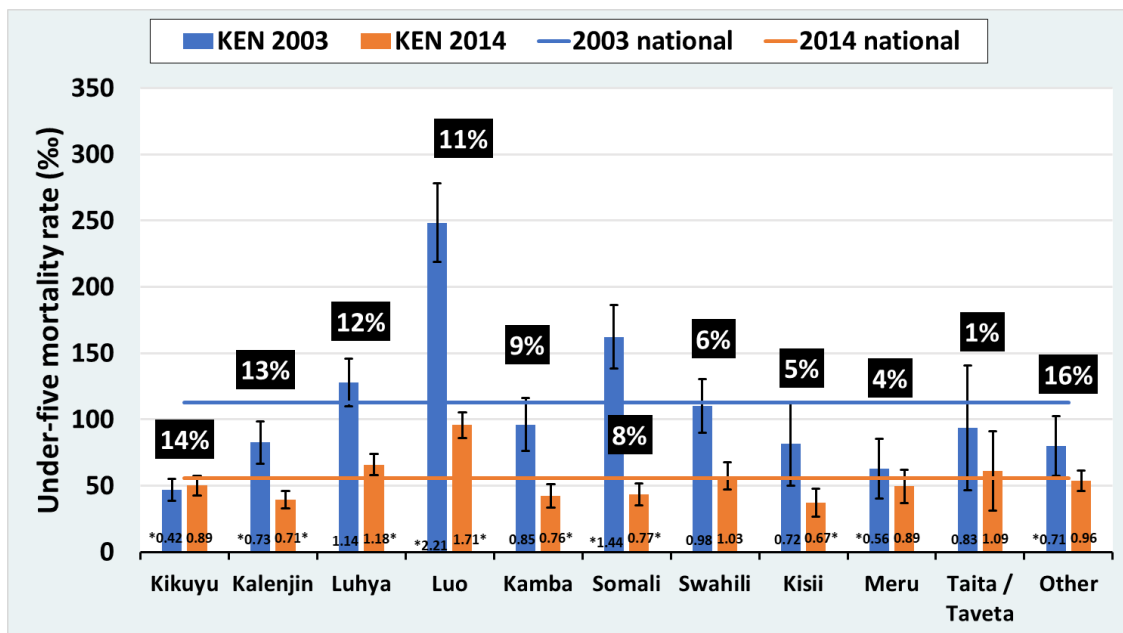

Kosovo

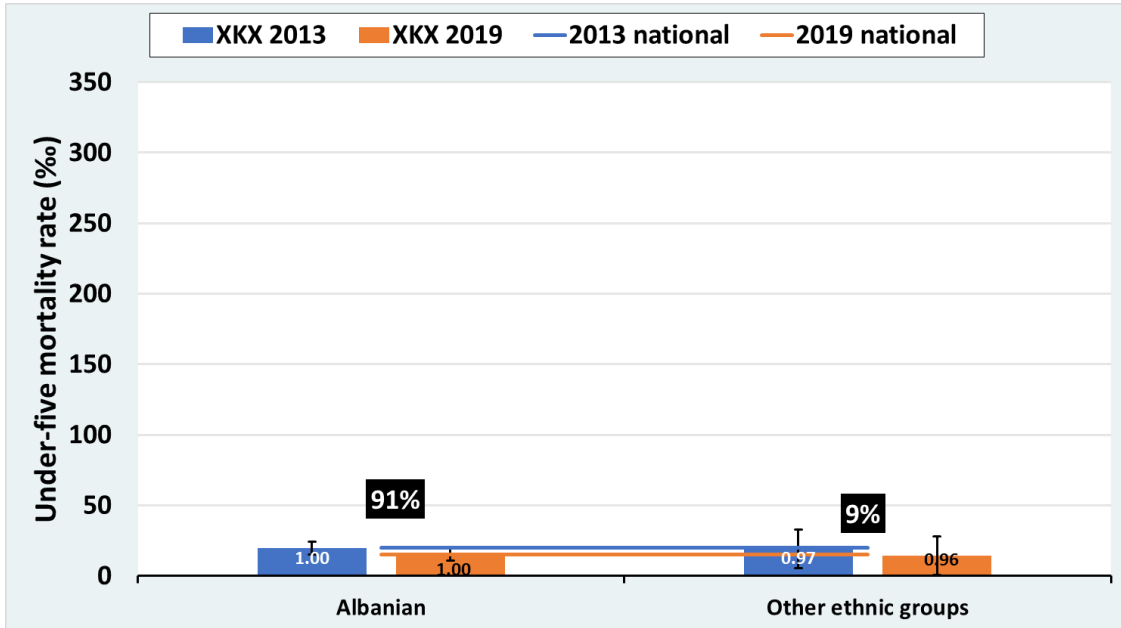

Kyrgyzstan

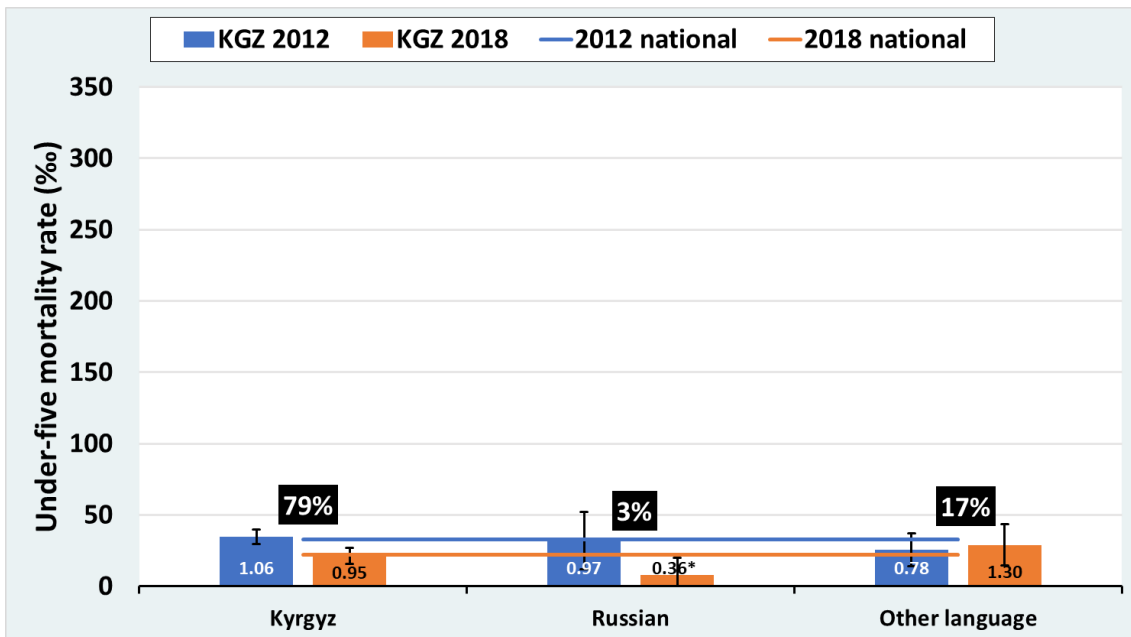

Lao PDR

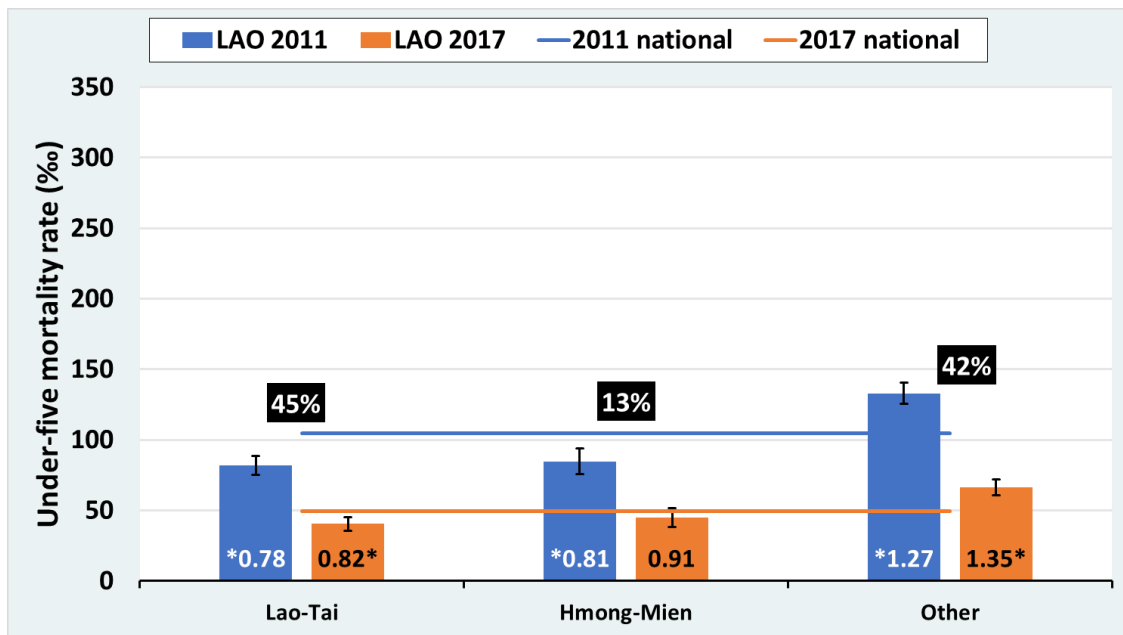

Malawi

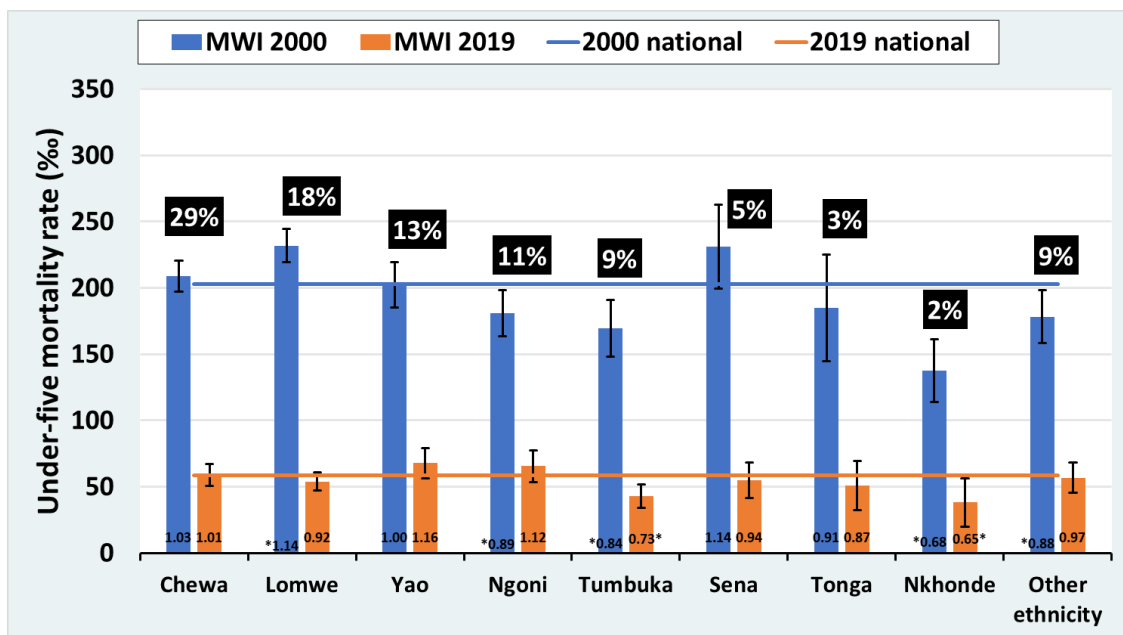

Mali

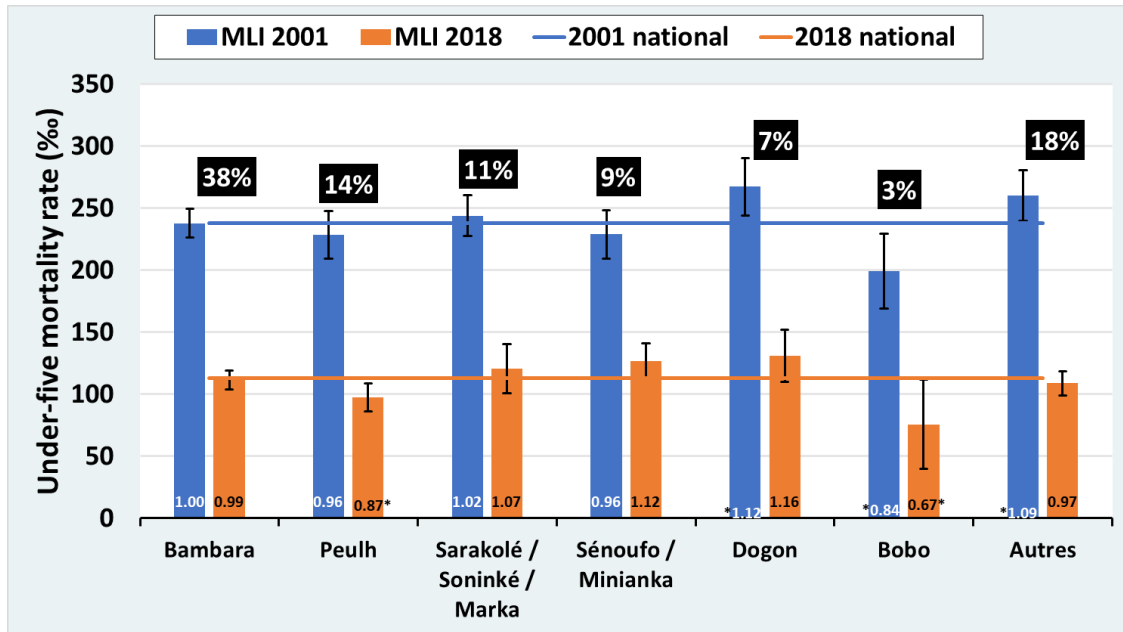

Mauritania

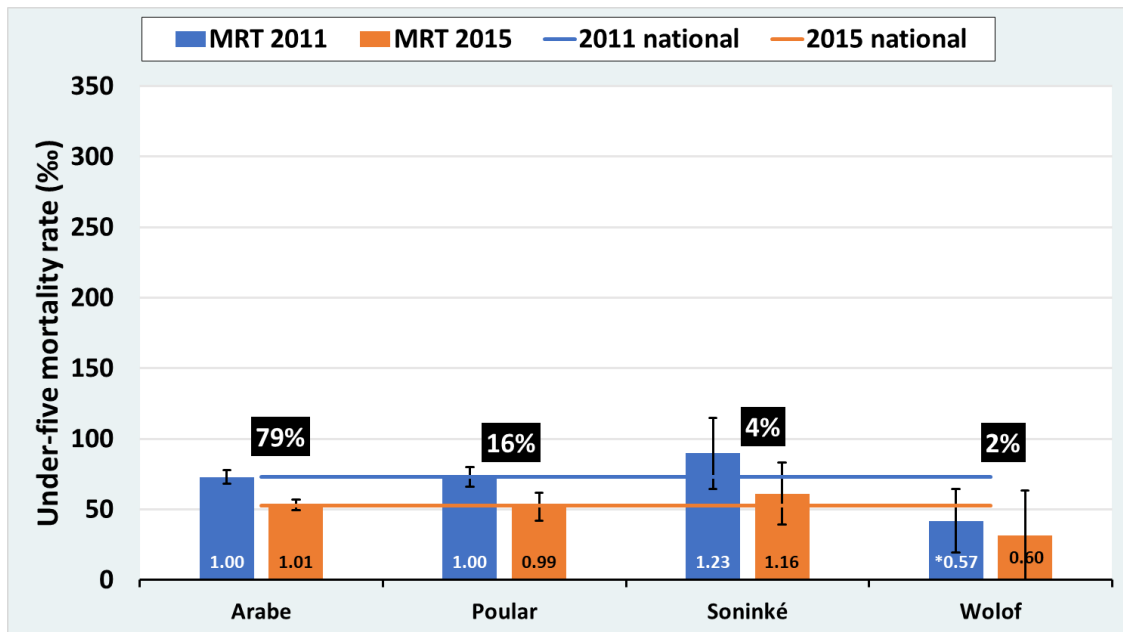

Moldova

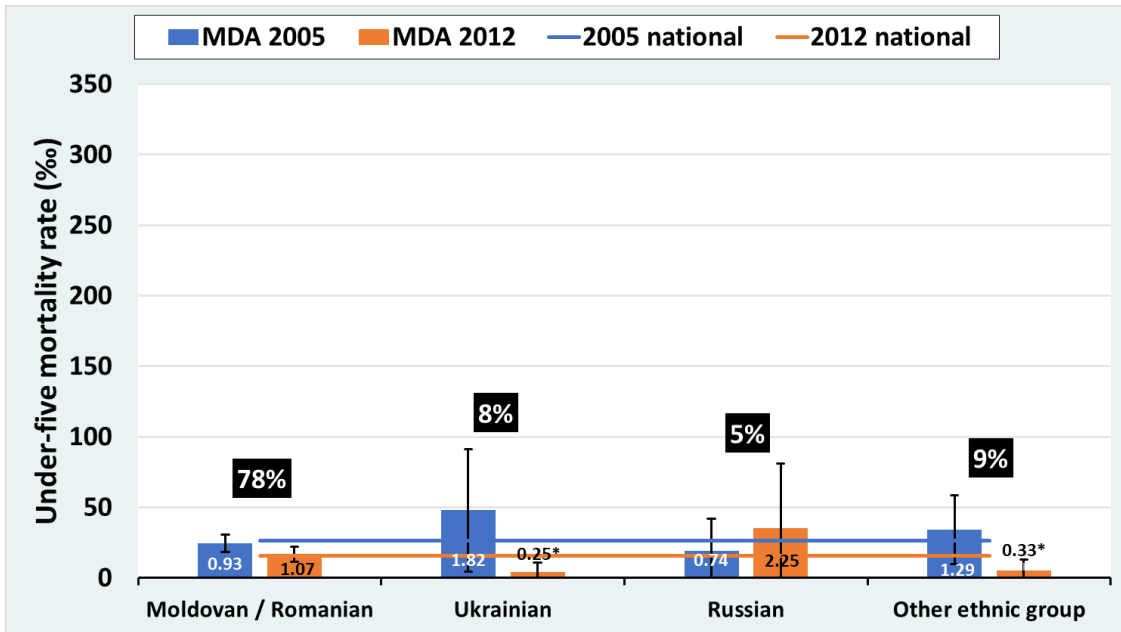

Mongolia

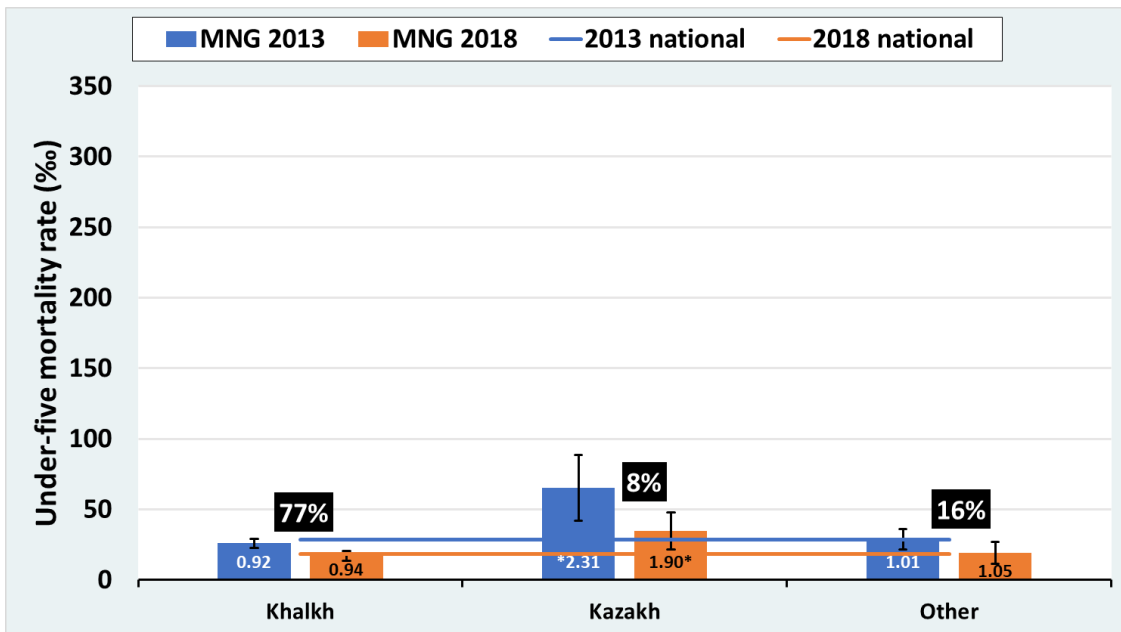

## Mozambique

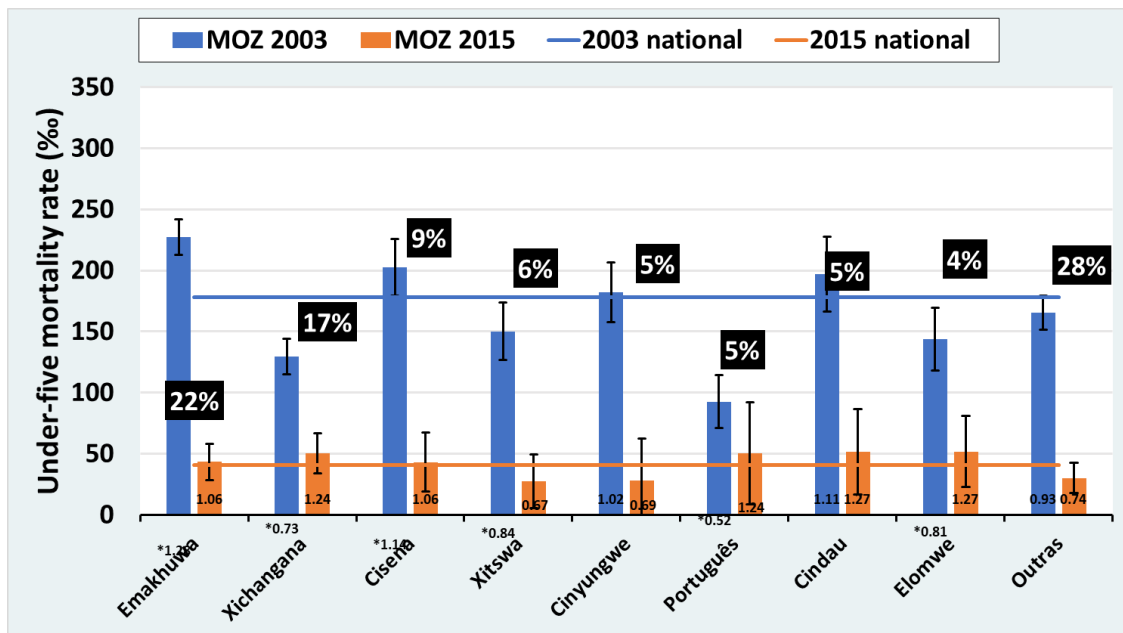

## Namibia

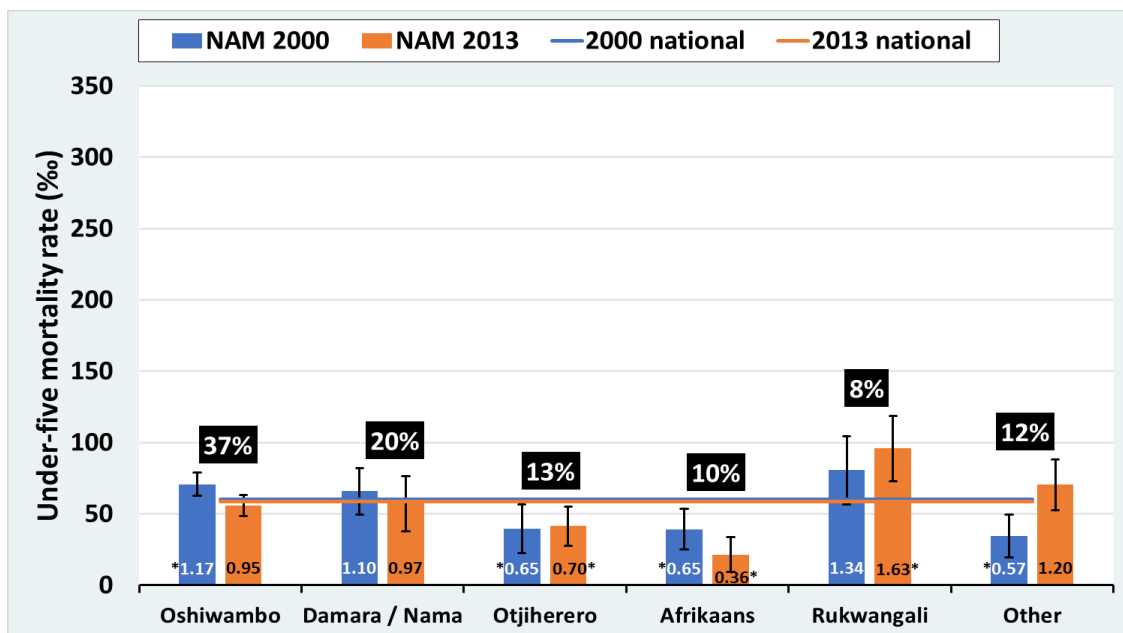

## Nepal

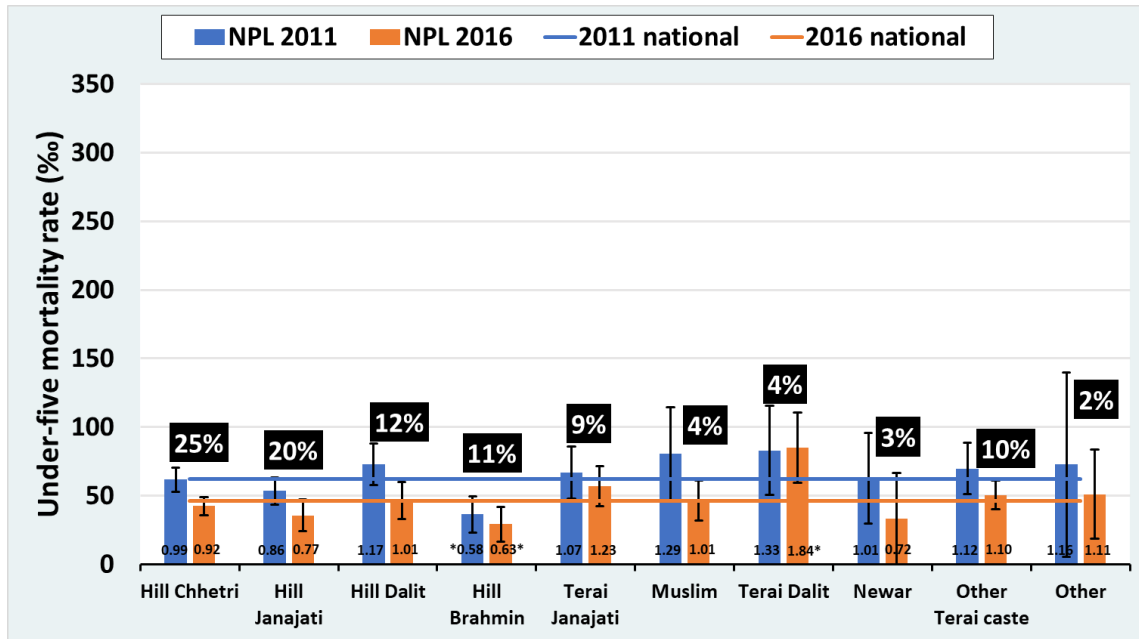

## Niger

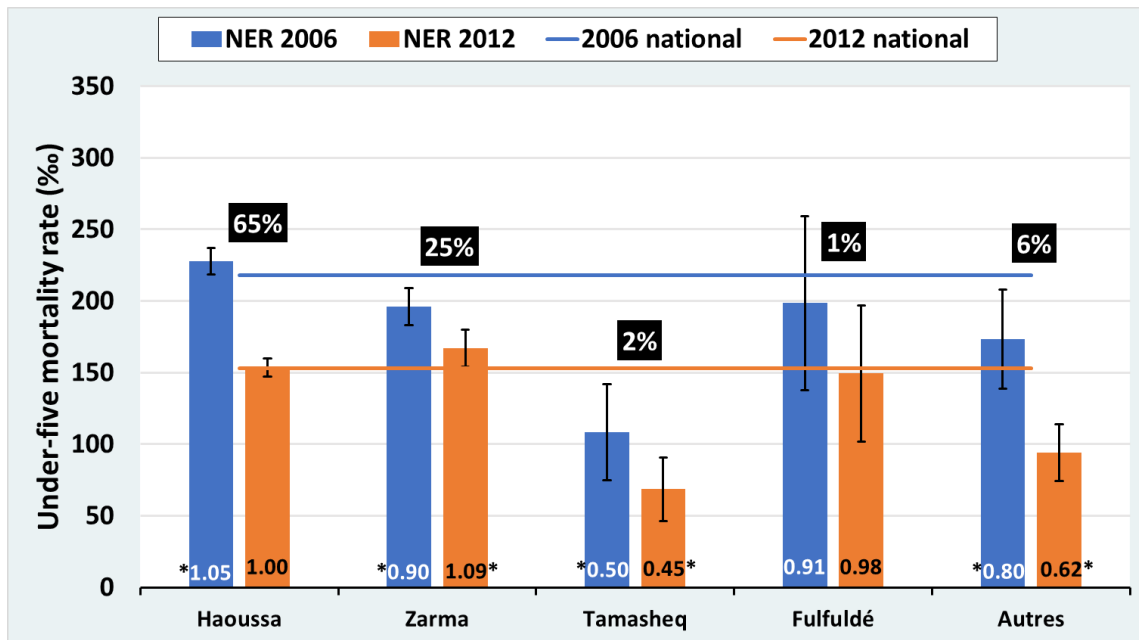

Nigeria

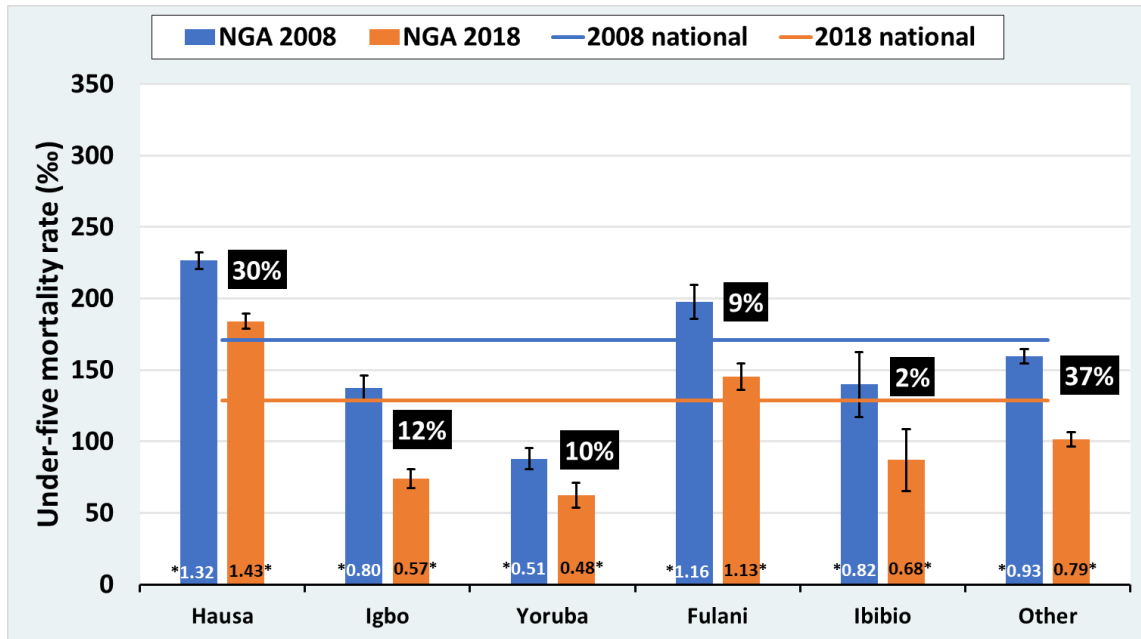

Pakistan

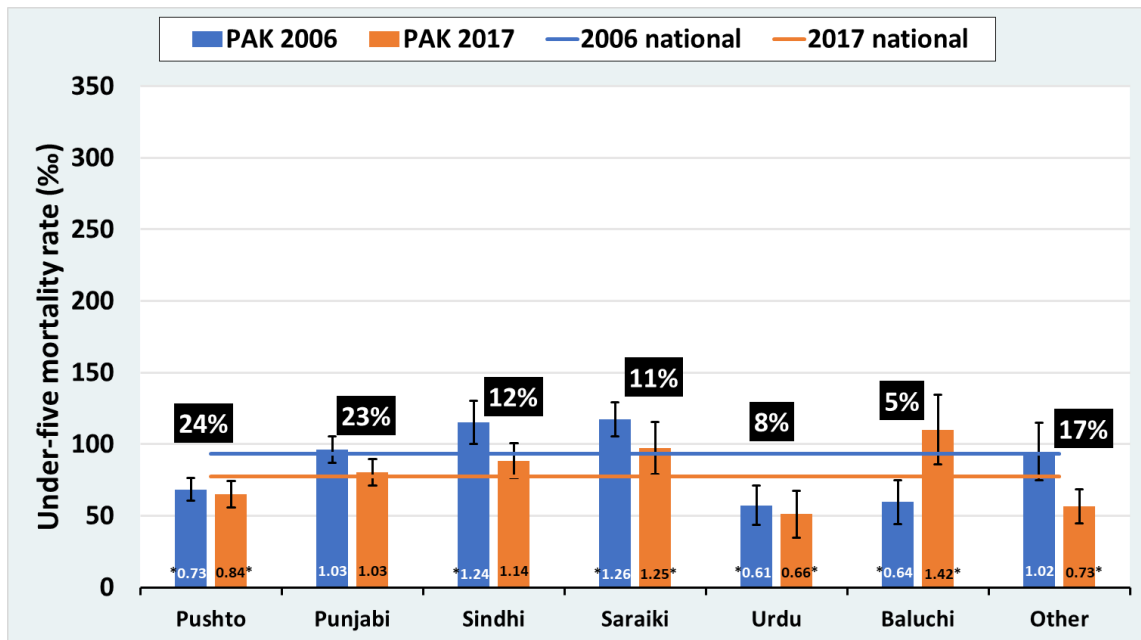



Peru

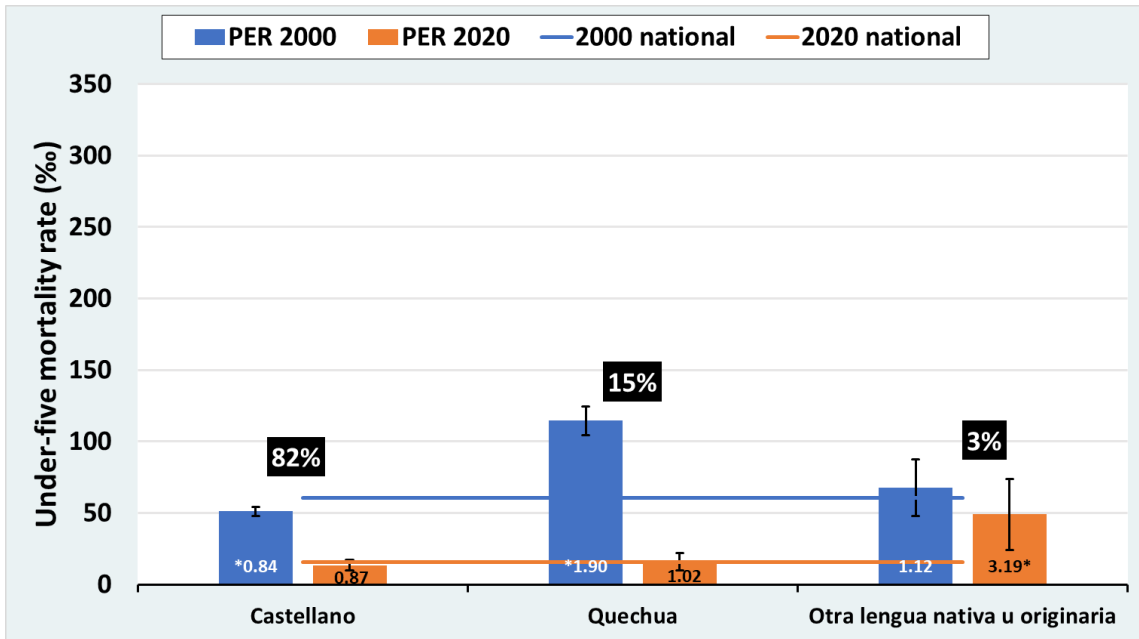

Philippines

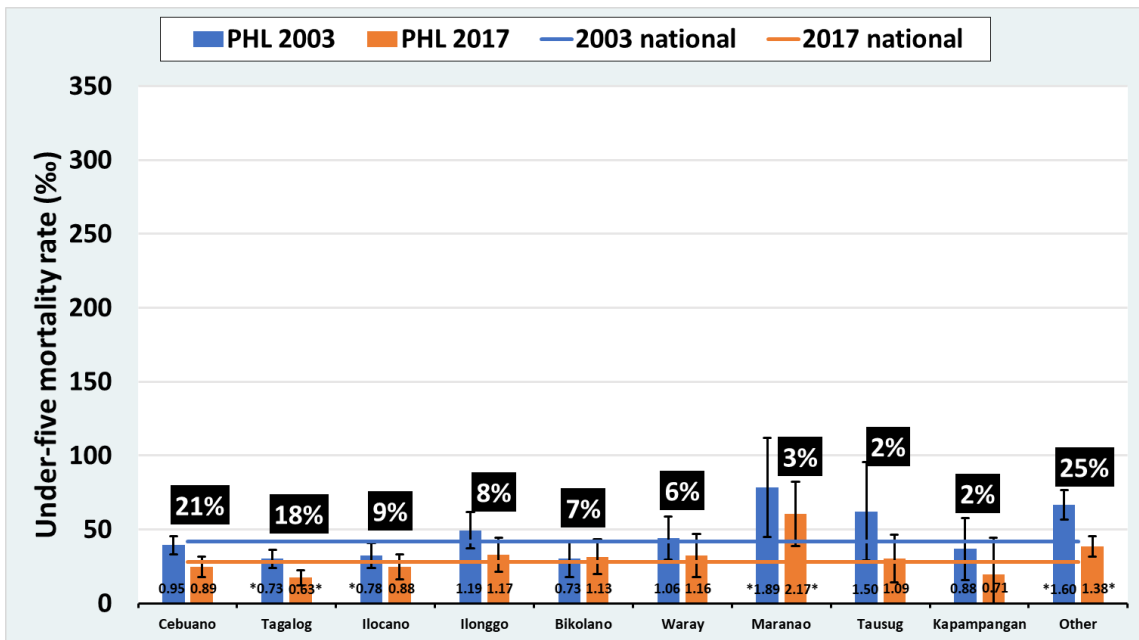

Sao Tome and Principe

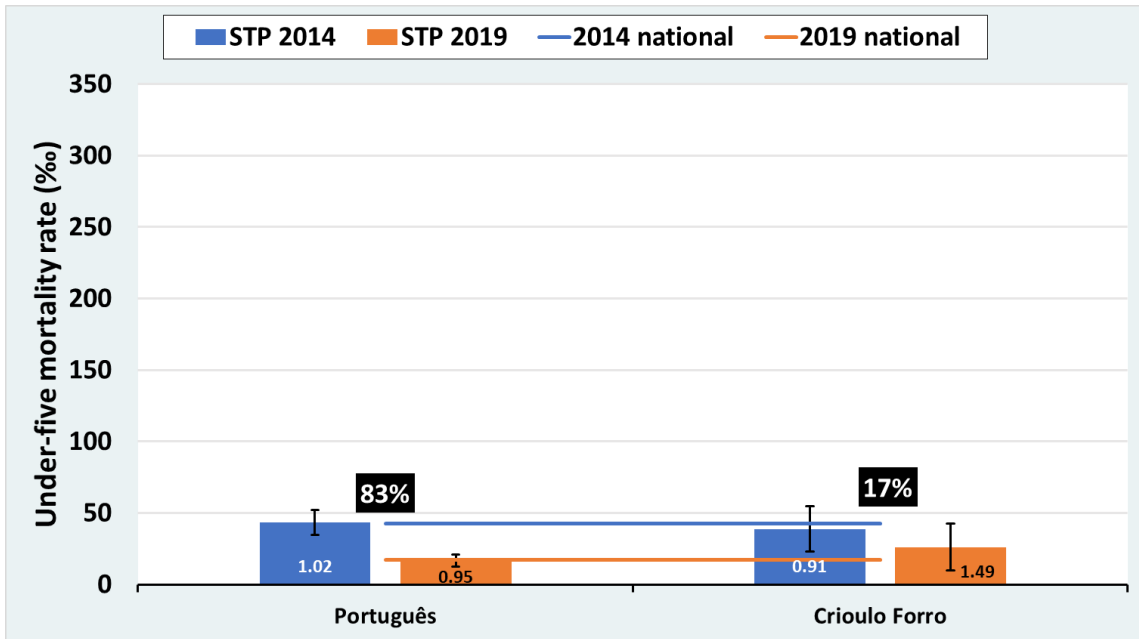

Senegal

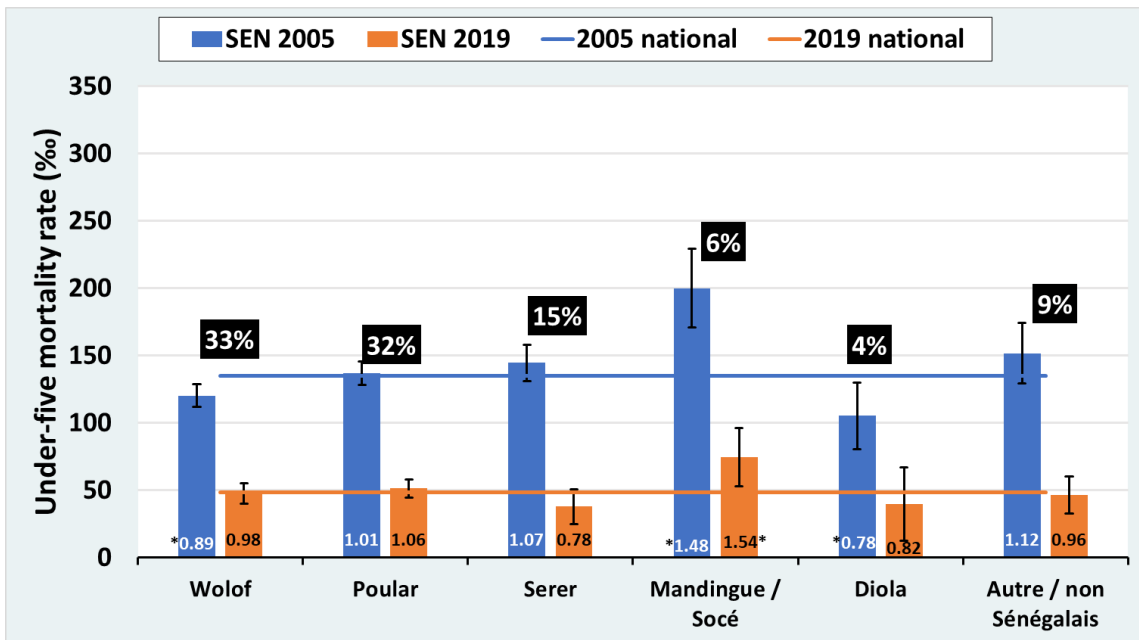

Sierra Leone

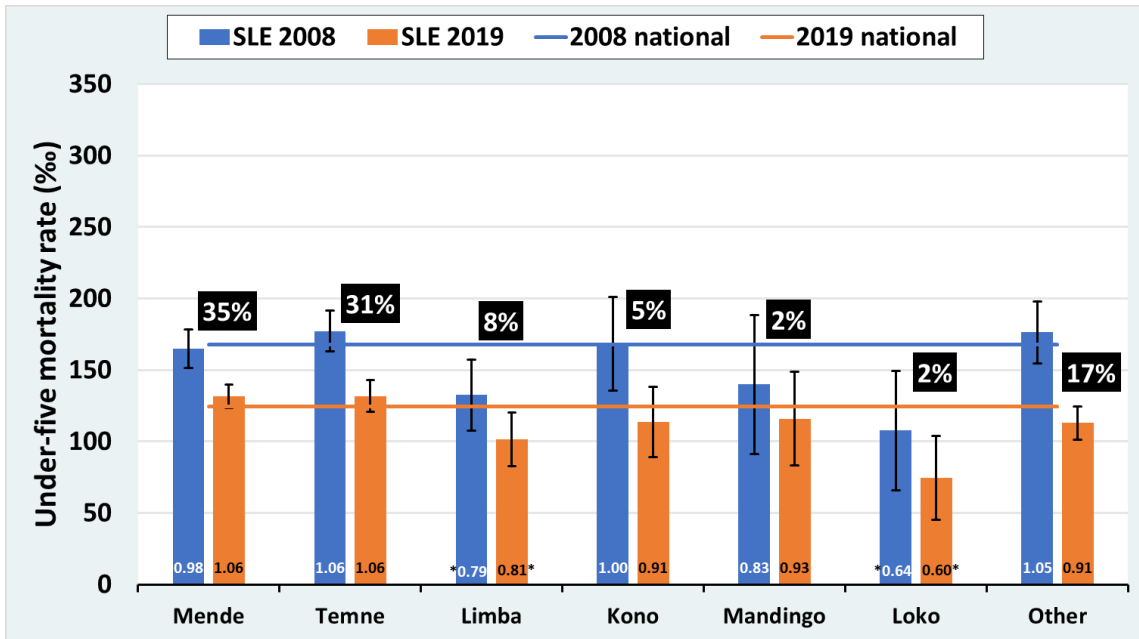

Tajikistan

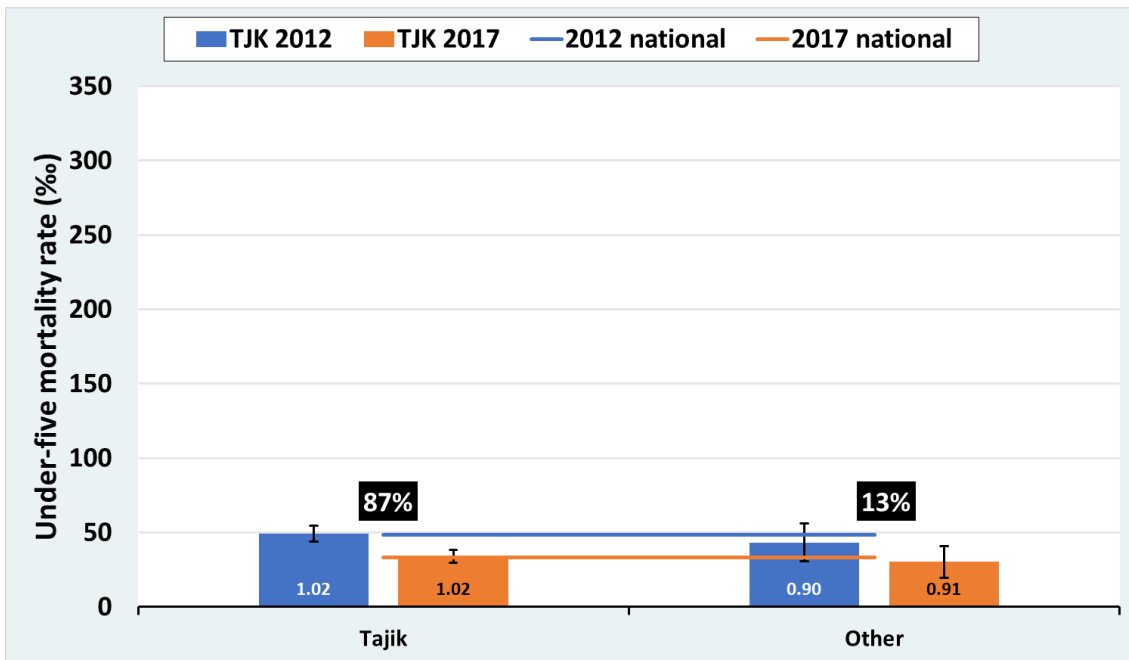

Timor-Leste

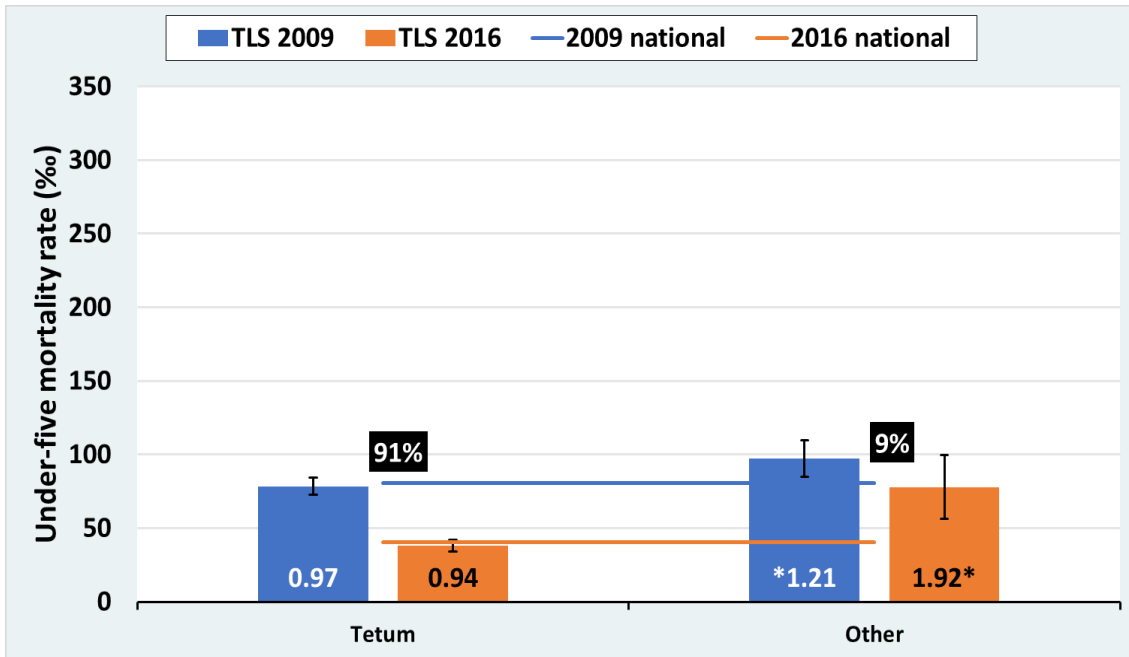

Togo

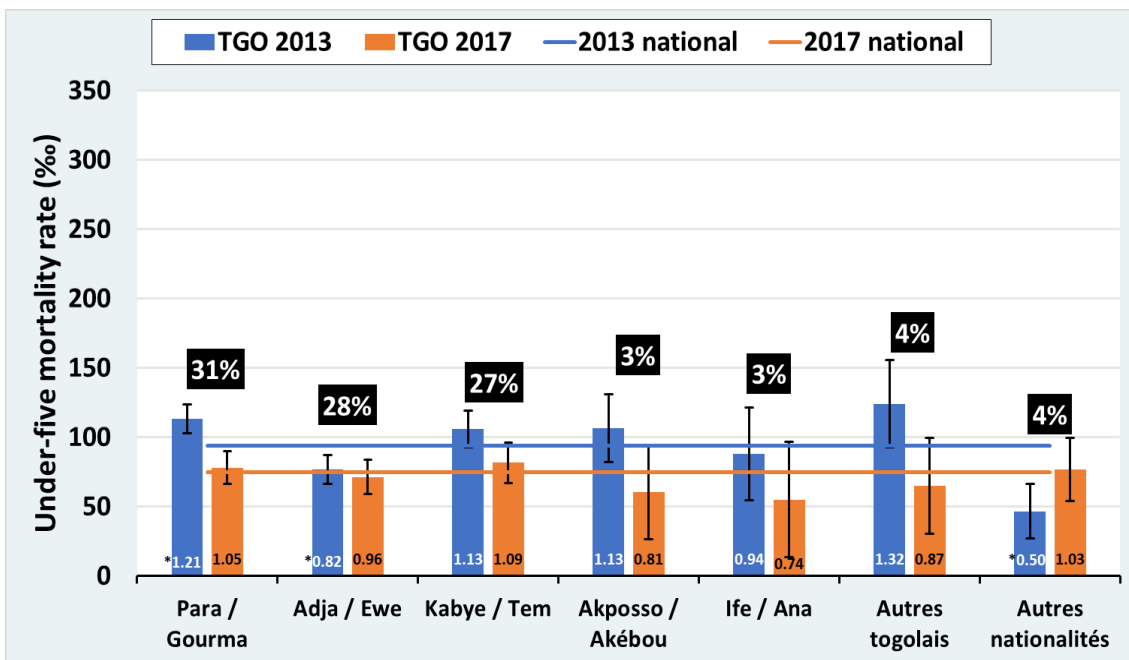

## Türkiye

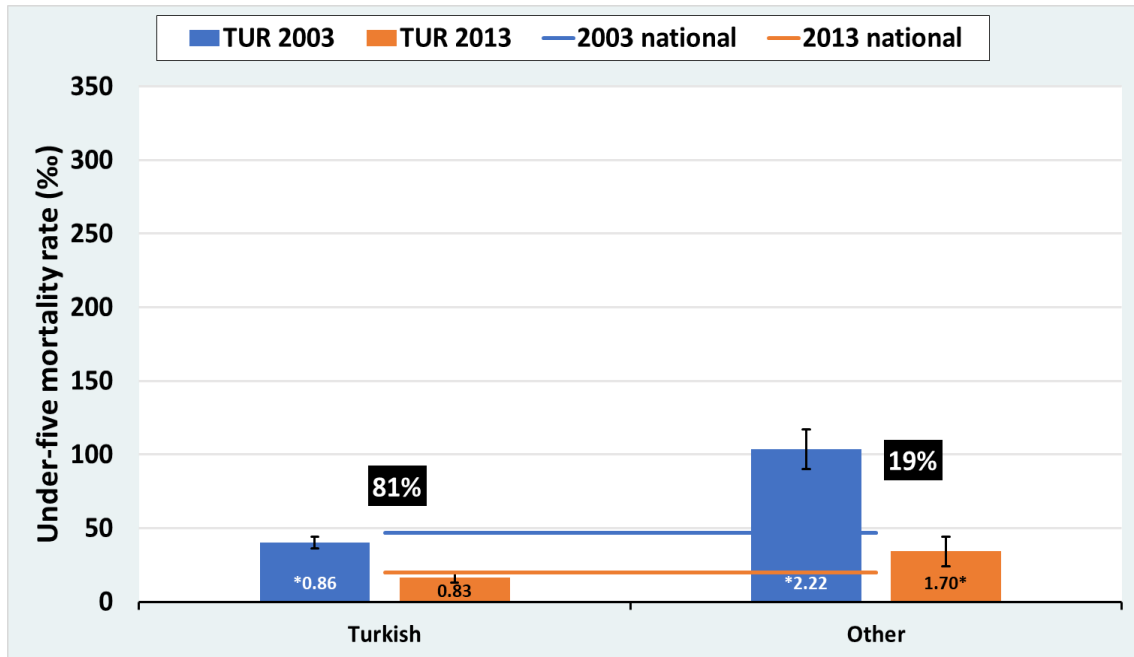

## Turkmenistan

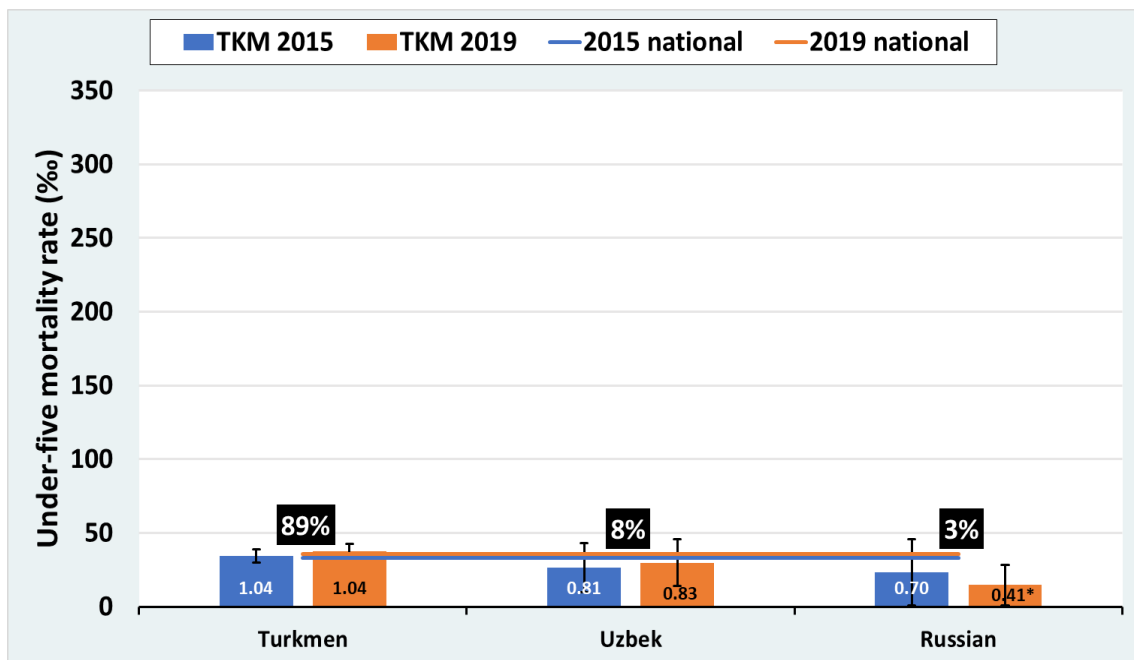

Uganda

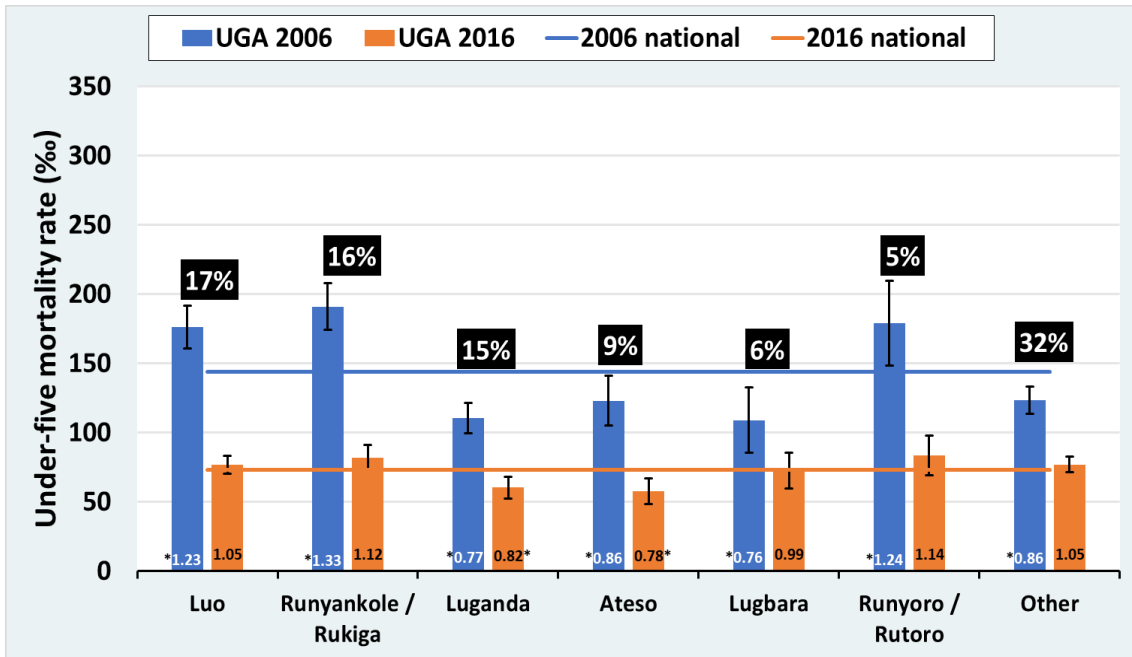

Vietnam

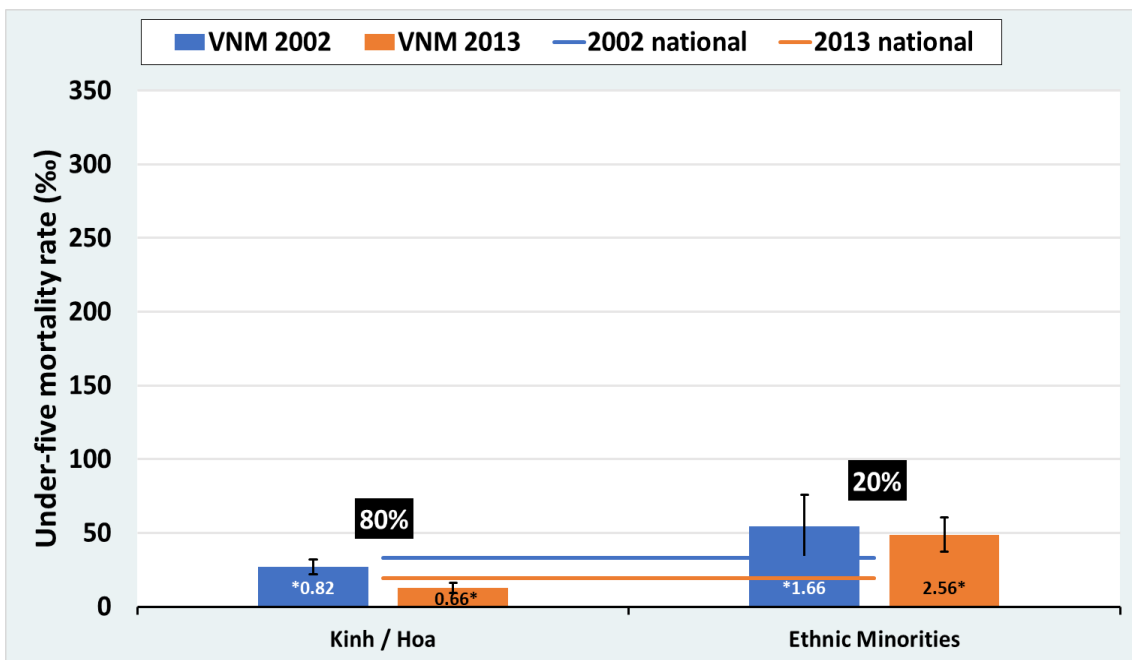

Zambia

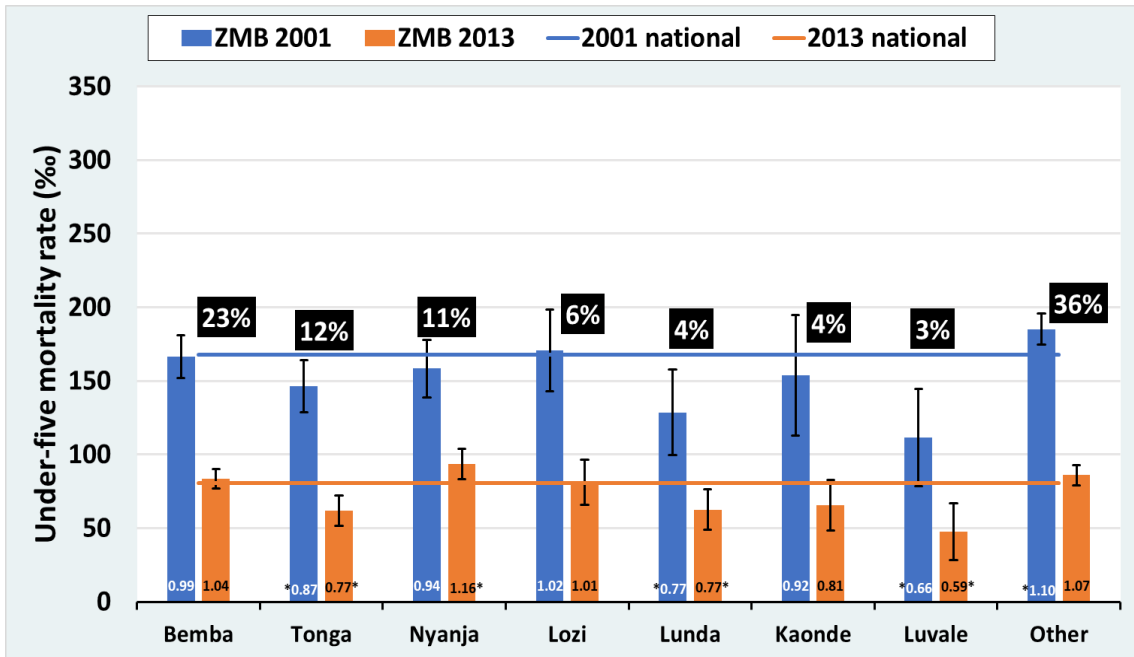

Zimbabwe

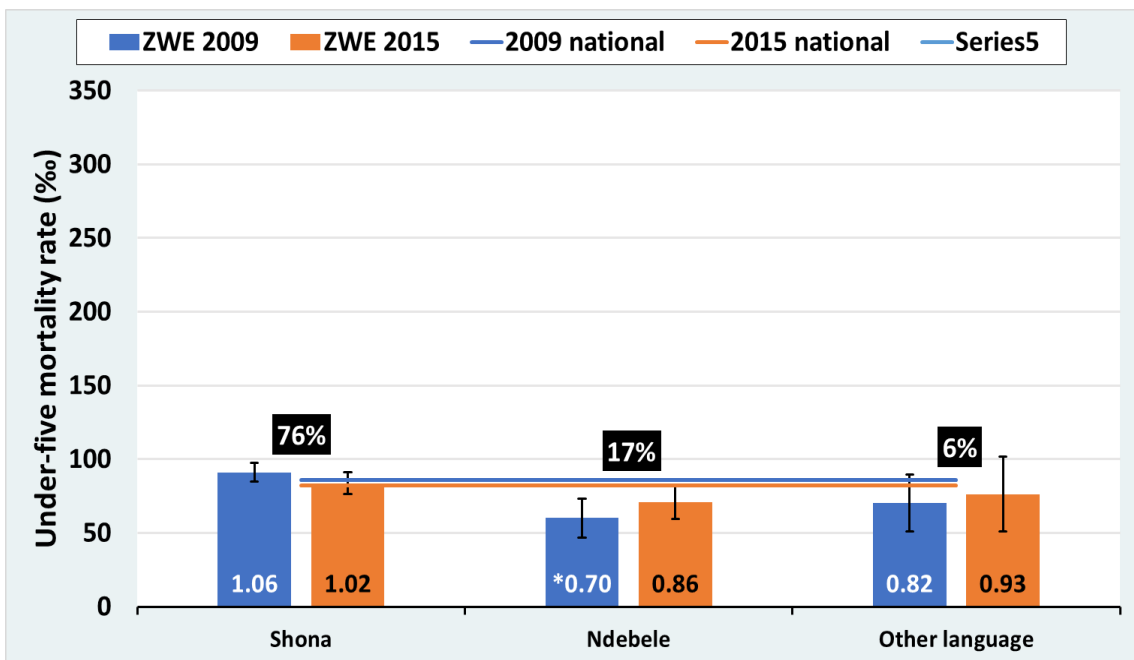

Supplement: MOESM6 [file 25296702]
